# Supplementary material for: Electrochemical cyclization ofN-cyanamide alkenes with CF3SO2Na to access C,N-(bis)trifluoromethylated cyclic amidines and related compounds
Source: Royal Society of Chemistry journal article supplement (doi:10.1039/d2qo01323a), 2022-01-01
Supplement: d2qo01323a1.pdf [file d2qo01323a1.pdf]

# Electrochemical cyclization of *N*-cyanamide alkenes with $\text{CF}_3\text{SO}_2\text{Na}$ to access *C*, *N*- (bis)trifluoromethylated cyclic amidines and related compounds

Zhihua Yan,<sup>a</sup> Wencheng Li,<sup>a</sup> Yuheng Wu,<sup>a</sup> Qibo Yan,<sup>a</sup> Zhonglin Wei,<sup>a</sup> Wei-Wei Liao\*<sup>a,b</sup>

<sup>a</sup> Department of Organic Chemistry, College of Chemistry, Jilin University, 2699 Qianjin Street, Changchun 130012, P R China.

<sup>b</sup> State Key Laboratory of Organometallic Chemistry, Shanghai Institute of Organic Chemistry, Chinese Academy of Sciences, Shanghai 200032, P R China

E-mail: [wlliao@jlu.edu.cn](mailto:wlliao@jlu.edu.cn)

## Table of Contents

|              |                                                                             |              |
|--------------|-----------------------------------------------------------------------------|--------------|
| <b>I.</b>    | <b>General Information.....</b>                                             | <b>SI-2</b>  |
| <b>II.</b>   | <b>Reaction Conditions Screening .....</b>                                  | <b>SI-3</b>  |
| <b>III.</b>  | <b>Preparation of Substrates.....</b>                                       | <b>SI-8</b>  |
| <b>IV.</b>   | <b>General Procedure and Experimental Details.....</b>                      | <b>SI-23</b> |
| <b>V.</b>    | <b>Scale-up Reaction and Synthetic Transformations.....</b>                 | <b>SI-44</b> |
| <b>VI.</b>   | <b>Control Experiments .....</b>                                            | <b>SI-47</b> |
| <b>VII.</b>  | <b>Cyclic Voltammetry (CV) Experiments.....</b>                             | <b>SI-52</b> |
| <b>VIII.</b> | <b>DFT Calculations.....</b>                                                | <b>SI-55</b> |
| <b>IX.</b>   | <b>References.....</b>                                                      | <b>SI-74</b> |
| <b>X.</b>    | <b>Crystal Data and Structure Refinements.....</b>                          | <b>SI-75</b> |
| <b>XI.</b>   | <b><sup>1</sup>H, <sup>13</sup>C and <sup>19</sup>F NMR Spectral Copies</b> |              |

## I. General Information

All reactions were carried out under inert atmospheric condition unless otherwise noted, and solvents were dried according to established procedures. Reactions were monitored by thin layer chromatography (TLC) visualizing with ultraviolet light (UV), and  $\text{KMnO}_4$ ; column chromatography purifications were carried out using silica gel. Proton nuclear magnetic resonance ( $^1\text{H}$  NMR) spectra were recorded on a 300, 400 or 500 MHz spectrometer in  $\text{CDCl}_3$  or DMSO, fluorine nuclear magnetic resonance ( $^{19}\text{F}$  NMR) spectra were recorded on a 376 or 470 MHz spectrometer in  $\text{CDCl}_3$  or DMSO, and carbon nuclear magnetic resonance ( $^{13}\text{C}$  NMR) spectra were recorded on 125 or 100 MHz spectrometer in  $\text{CDCl}_3$  or DMSO unless otherwise noted. Chemical shifts for protons are reported in parts per million downfield from tetramethylsilane (TMS) and are referenced to residual protium in the NMR solvent ( $\text{CHCl}_3 = \delta$  7.26 ppm, DMSO =  $\delta$  2.50 ppm). Chemical shifts for carbon are reported in parts per million downfield from tetramethylsilane (TMS) and are referenced to the carbon resonances of the solvent residual peak ( $\text{CDCl}_3 = \delta$  77.16 ppm, DMSO =  $\delta$  39.52 ppm). NMR data are presented as follows: chemical shift ( $\delta$  ppm), multiplicity (s = singlet, d = doublet, t = triplet, q = quartet, m = multiplet, br = broad), coupling constant in Hertz (Hz), integration. Mass spectra were recorded on the Bruker MicrOTOF Q II. Melting points were measured on a melting point apparatus and were uncorrected. Electrochemical reactions were performed under air using undivided glassware. Electrochemical reactions were conducted using DJS-292 potentiostat in constant current mode. Cyclic voltammetry experiments were carried out in DY2113 potentiostat (Digi Ivy).

## II. Reaction Conditions Screening

**Table S1. Optimized reaction conditions: effect of solvent <sup>a</sup>**

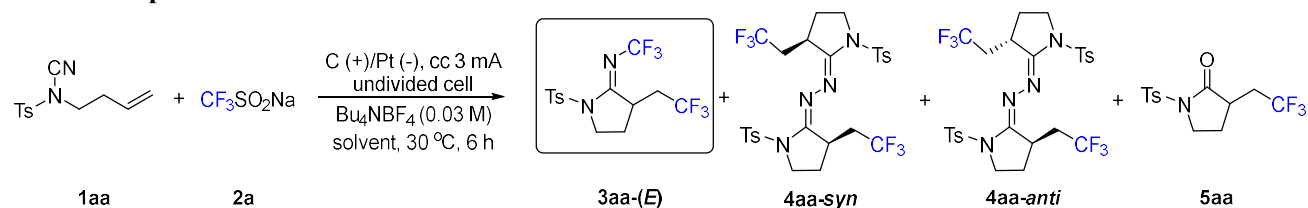

| Entry | Solvent                                   | Yield (%) <sup>b</sup> |                |                 |            |
|-------|-------------------------------------------|------------------------|----------------|-----------------|------------|
|       |                                           | <b>3aa</b>             | <b>4aa-syn</b> | <b>4aa-anti</b> | <b>5aa</b> |
| 1     | DCM/H <sub>2</sub> O (5/1)                | 30                     | 17             | 16              | 17         |
| 2     | CHCl <sub>3</sub> /H <sub>2</sub> O (5/1) | 28                     | 10             | 10              | 13         |
| 3     | THF/H <sub>2</sub> O (5/1)                | nd                     | nd             | nd              | 0          |
| 4     | dioxane/H <sub>2</sub> O (5/1)            | 8                      | 6              | 5               | < 1        |
| 5     | CH <sub>3</sub> CN/H <sub>2</sub> O (5/1) | 28                     | 12             | 14              | < 1        |
| 6     | Acetone/H <sub>2</sub> O (5/1)            | 30                     | 5              | 5               | < 1        |
| 7     | DMF/H <sub>2</sub> O (5/1)                | 12                     | 5              | 4               | 6          |
| 8     | HFIP/H <sub>2</sub> O (5/1)               | 27                     | 0              | 0               | 0          |
| 9     | CH <sub>3</sub> OH/H <sub>2</sub> O (5/1) | 11                     | 4              | 4               | < 1        |
| 10    | DCM/HFIP/H <sub>2</sub> O (5/1/1)         | 30                     | 14             | 13              | 7          |
| 11    | DCM                                       | 24                     | 5              | 3               | 0          |

<sup>a</sup> Reaction conditions: **1aa** (0.3 mmol), **2a** (0.9 mmol),  $\text{Bu}_4\text{NBF}_4$  (0.3 mmol) and solvent ( $c = 0.03$  M) in an undivided cell with graphite rod ( $\Phi$  6 mm) and Pt plate cathode ( $10 \times 10 \times 0.1$  mm), constant current = 3.0 mA, 30 °C, 6 h. <sup>b</sup> Determined by <sup>1</sup>H NMR analysis using 1,3,5-trimethylbenzene as the internal standard.

**Table S2. Optimized reaction conditions: effect of electrolyte <sup>a</sup>**

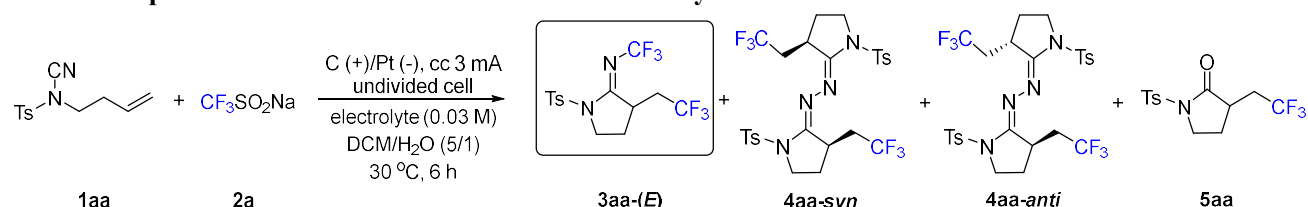

| Entry | Electrolyte                | Yield (%) <sup>b</sup> |                |                 |            |
|-------|----------------------------|------------------------|----------------|-----------------|------------|
|       |                            | <b>3aa</b>             | <b>4aa-syn</b> | <b>4aa-anti</b> | <b>5aa</b> |
| 1     | $\text{Bu}_4\text{NBF}_4$  | 30                     | 18             | 16              | 17         |
| 2     | $\text{LiClO}_4$           | 0                      | 0              | 0               | 0          |
| 3     | $\text{Bu}_4\text{NClO}_4$ | 24                     | 17             | 19              | 13         |
| 4     | $\text{Bu}_4\text{NPF}_6$  | 25                     | 15             | 15              | 24         |
| 5     | TBAB                       | 16                     | 8              | 9               | 18         |
| 6     | $\text{Bu}_4\text{NOAc}$   | 16                     | 3              | 3               | 8          |
| 7     | $\text{Et}_4\text{NOTs}$   | 6                      | 0              | 0               | 0          |

<sup>a</sup> Reaction conditions: **1aa** (0.3 mmol), **2a** (0.9 mmol),  $\text{Bu}_4\text{NBF}_4$  (0.3 mmol) and DCM/H<sub>2</sub>O (5/1) ( $c = 0.03$  M) in an undivided cell with graphite rod ( $\Phi$  6 mm) and Pt plate cathode ( $10 \times 10 \times 0.1$  mm), constant current = 3.0 mA, 30 °C, 6 h. <sup>b</sup> Determined by <sup>1</sup>H NMR analysis using 1,3,5-trimethylbenzene as the internal standard.

**Table S3. Optimized reaction conditions: effects of current, electrode and additive <sup>a</sup>**

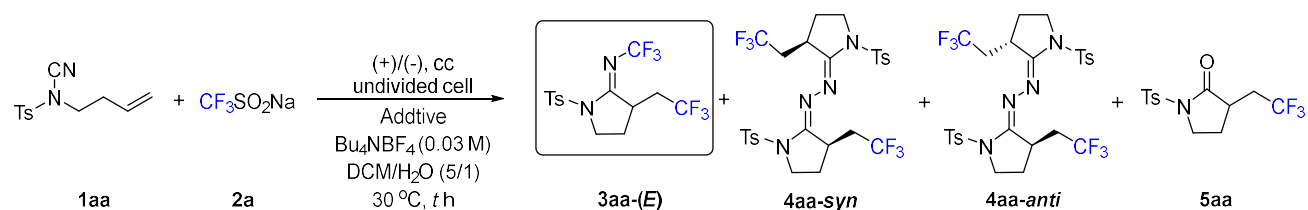

| Entry           | +/-        | I (mA) | $t$ (h) | Additive                        | Yield (%) <sup>b</sup> |                |                 |            |
|-----------------|------------|--------|---------|---------------------------------|------------------------|----------------|-----------------|------------|
|                 |            |        |         |                                 | <b>3aa</b>             | <b>4aa-syn</b> | <b>4aa-anti</b> | <b>5aa</b> |
| 1               | C/C        | 3      | 6       | -                               | 30                     | 18             | 16              | 17         |
| 2               | C/C        | 5      | 6       | -                               | 37                     | 17             | 17              | 25         |
| 3               | C/C        | 10     | 3       | -                               | 45                     | 3              | 3               | 36         |
| 4               | C/Pt       | 10     | 3       | -                               | 49                     | 3              | 3               | 40         |
| 5               | C/Fe       | 10     | 3       | -                               | 41                     | 4              | 4               | 28         |
| 6               | C-plate/Pt | 10     | 3       | -                               | 43                     | 3              | 4               | 37         |
| 7               | RVC/Pt     | 10     | 3       | -                               | 30                     | 15             | 15              | 18         |
| 8               | C/Pt       | 10     | 3       | TFA (3 eq)                      | 48                     | 3              | 3               | 39         |
| 9               | C/Pt       | 10     | 3       | AcOH (3 eq)                     | 49                     | 2              | 2               | 37         |
| 10              | C/Pt       | 10     | 3       | AcONa (3 eq)                    | 48                     | 2              | 2               | 34         |
| 11              | C/Pt       | 10     | 3       | $\text{KH}_2\text{PO}_4$ (3 eq) | 54                     | 2              | 3               | 31         |
| 12              | C/Pt       | 10     | 3       | $\text{K}_3\text{PO}_4$ (3 eq)  | 42                     | 2              | 3               | 30         |
| 13              | C/Pt       | 10     | 3       | $\text{KH}_2\text{PO}_4$ (1 eq) | 51                     | 6              | 6               | 32         |
| 14              | C/Pt       | 10     | 3       | $\text{KH}_2\text{PO}_4$ (5 eq) | 52                     | 9              | 9               | 23         |
| 15 <sup>c</sup> | C/Pt       | 10     | 3       | $\text{KH}_2\text{PO}_4$ (3 eq) | 56 (52)                | 14             | 16              | 9          |
| 16 <sup>c</sup> | C/Pt       | 20     | 3       | $\text{KH}_2\text{PO}_4$ (3 eq) | 65 (61)                | 0              | 0               | 24 (21)    |
| 17 <sup>c</sup> | C/Pt       | 28     | 3       | $\text{KH}_2\text{PO}_4$ (3 eq) | 52                     | 0              | 0               | 19         |

<sup>a</sup> Reaction conditions: **1aa** (0.3 mmol), **2a** (0.9 mmol),  $\text{Bu}_4\text{NBF}_4$  (0.3 mmol), additive and DCM/ $\text{H}_2\text{O}$  (5/1) ( $c = 0.03$  M) in an undivided cell with graphite rod ( $\Phi$  6 mm), C-plate ( $10 \times 10 \times 1$  mm), Ni ( $10 \times 10 \times 1$  mm), Fe ( $10 \times 10 \times 1$  mm), RVC (100 PPI, 1 cm  $\times$  1 cm  $\times$  1 cm) and Pt plate cathode ( $10 \times 10 \times 0.1$  mm) constant current, 30 °C. <sup>b</sup> Determined by  $^1\text{H}$  NMR analysis using 1,3,5-trimethylbenzene as the internal standard. Isolated yields were given in parentheses. <sup>c</sup> **2a** (1.2 mmol).

**Table S4. Optimized reaction conditions: effects of other parameters<sup>a</sup>**

| Entry           | <i>t</i> (h) | Additive                               | Yield (%) <sup>b</sup> |         |          |         |
|-----------------|--------------|----------------------------------------|------------------------|---------|----------|---------|
|                 |              |                                        | 3aa                    | 4aa-syn | 4aa-anti | 5aa     |
| 1               | 3            | KH <sub>2</sub> PO <sub>4</sub> (3 eq) | 64                     | 0       | 0        | 24      |
| 2               | 1            | KH <sub>2</sub> PO <sub>4</sub> (3 eq) | 63                     | 11      | 10       | 0       |
| 3               | 1.5          | KH <sub>2</sub> PO <sub>4</sub> (3 eq) | 63                     | 6       | 6        | 13      |
| 4               | 2            | KH <sub>2</sub> PO <sub>4</sub> (3 eq) | 64 (61)                | 0       | 0        | 22 (20) |
| 5 <sup>c</sup>  | 2            | KH <sub>2</sub> PO <sub>4</sub> (3 eq) | 56 (52)                | 0       | 0        | 19 (15) |
| 6 <sup>d</sup>  | 2            | KH <sub>2</sub> PO <sub>4</sub> (3 eq) | 56                     | 0       | 0        | 23      |
| 7 <sup>e</sup>  | 4            | KH <sub>2</sub> PO <sub>4</sub> (3 eq) | 56 (54)                | 0       | 0        | 23 (20) |
| 9 <sup>f</sup>  | 2            | -                                      | -                      | -       | -        | -       |
| 10 <sup>g</sup> | 2            | KH <sub>2</sub> PO <sub>4</sub> (3 eq) | -                      | -       | -        | -       |
| 11 <sup>h</sup> | 2            | KH <sub>2</sub> PO <sub>4</sub> (3 eq) | 60                     | trace   | trace    | 20      |

<sup>a</sup> Reaction conditions: **1aa** (0.3 mmol), **2a** (1.2 mmol), Bu<sub>4</sub>NBF<sub>4</sub> (0.3 mmol), additive and DCM/H<sub>2</sub>O (5/1) (*c* = 0.03 M) in an undivided cell with graphite rod (Φ 6 mm) and Pt plate cathode (10 × 10 × 0.1 mm), constant current = 20 mA, 30 °C. <sup>b</sup> Determined by <sup>1</sup>H NMR analysis using 1,3,5-trimethylbenzene as the internal standard. Isolated yields were given in parentheses. <sup>c</sup> (CF<sub>3</sub>SO<sub>2</sub>)<sub>2</sub>Zn (0.6 mmol). <sup>d</sup> Under N<sub>2</sub>. <sup>e</sup> Constant potential = 10 V (*I* = 17.6–14.3 mA). <sup>f</sup> The constant current mode cannot be supported due to the out of range of voltage when the reaction was performed with constant current = 20 mA without KH<sub>2</sub>PO<sub>4</sub>. <sup>g</sup> Without electricity. <sup>h</sup> IKA ElectraSyn 2.0. *I* = 20 mA: 1 h, 2.49 F·mol<sup>-1</sup>; 1.5 h, 3.74 F·mol<sup>-1</sup>; 2 h, 4.97 F·mol<sup>-1</sup>; 3 h, 7.5 F·mol<sup>-1</sup>.

**Table S5. Optimized reaction conditions: effect of mediator<sup>a</sup>**

| Entry | Mediator (mol %)                             | Yield (%) <sup>b</sup> |         |          |     |
|-------|----------------------------------------------|------------------------|---------|----------|-----|
|       |                                              | 3aa                    | 4aa-syn | 4aa-anti | 5aa |
| 1     | Mn(OAc) <sub>2</sub> ·4H <sub>2</sub> O (10) | 52                     | 15      | 15       | 11  |
| 2     | MnBr <sub>2</sub> ·4H <sub>2</sub> O (20)    | 53                     | 12      | 14       | 15  |
| 3     | KBr (100)                                    | 36                     | 13      | 14       | 15  |

<sup>a</sup> Reaction conditions: **1aa** (0.3 mmol), **2a** (1.2 mmol), Bu<sub>4</sub>NBF<sub>4</sub> (0.3 mmol), KH<sub>2</sub>PO<sub>4</sub> (3 equiv) and DCM/H<sub>2</sub>O (5/1) (*c* = 0.03 M) in an undivided cell with graphite rod (Φ 6 mm) and Pt plate cathode (10 × 10 × 0.1 mm), constant current, 30 °C. <sup>b</sup> Determined by <sup>1</sup>H NMR analysis using 1,3,5-trimethylbenzene as the internal standard.

**Table S6. Optimized reaction conditions for Dimer 4aa <sup>a</sup>**

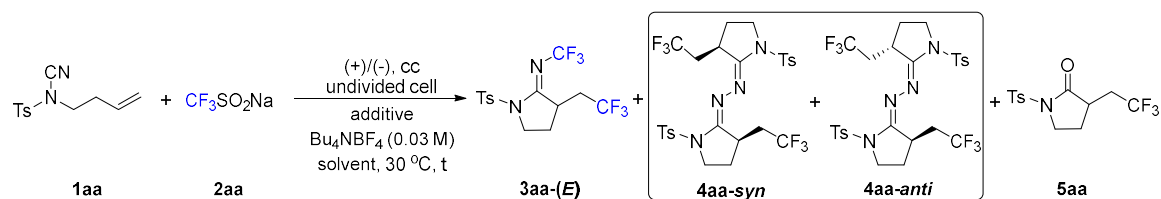

| Entry           | +/-        | I (mA) | t (h) | Additive                           | Yield (%) <sup>b</sup> |                |                 |            |
|-----------------|------------|--------|-------|------------------------------------|------------------------|----------------|-----------------|------------|
|                 |            |        |       |                                    | <b>3aa</b>             | <b>4aa-syn</b> | <b>4aa-anti</b> | <b>5aa</b> |
| 1               | C/C        | 3      | 6     | -                                  | 30                     | 17             | 18              | 16         |
| 2               | C/C        | 2      | 8     | -                                  | 28                     | 17             | 18              | 16         |
| 3               | C/C        | 1      | 16    | -                                  | 23                     | 18             | 19              | 21         |
| 4 <sup>c</sup>  | C/C        | 1      | 16    | -                                  | 23                     | 15             | 16              | 17         |
| 5               | C/Pt       | 1      | 16    | -                                  | 20                     | 17             | 17              | 24         |
| 6               | RVC/Pt     | 1      | 16    | -                                  | 16                     | 18             | 19              | 20         |
| 7               | C-plate/Pt | 1      | 16    | -                                  | 12                     | 15             | 15              | 12         |
| 8               | C/C        | 1      | 16    | $\text{KH}_2\text{PO}_4$ (3 equiv) | 22                     | 13             | 12              | 16         |
| 9               | C/C        | 1      | 16    | $\text{NaOAc}$ (3 equiv)           | 25 (23)                | 21(20)         | 21(21)          | 3          |
| 10              | C/C        | 1      | 16    | $\text{NaOAc}$ (1.5 equiv)         | 35                     | 19             | 17              | 14         |
| 11              | C/C        | 1      | 16    | $\text{NaOAc}$ (5 equiv)           | 26 (24)                | 24 (22)        | 22 (21)         | 2          |
| 12 <sup>d</sup> | C/C        | 1      | 16    | $\text{NaOAc}$ (5 equiv)           | 28                     | 19             | 17              | 0          |
| 13 <sup>e</sup> | C/C        | 1      | 16    | $\text{NaOAc}$ (3 equiv)           | 16                     | 21             | 22              | 0          |
| 14 <sup>f</sup> | C/C        | 1      | 16    | $\text{NaOAc}$ (3 equiv)           | 25 (23)                | 24 (26)        | 25 (27)         | 0          |

<sup>a</sup> Reaction conditions: **1aa** (0.3 mmol), **2a** (0.9 mmol, 3 equiv),  $\text{Bu}_4\text{NBF}_4$  (0.3 mmol),  $\text{KH}_2\text{PO}_4$  (3 equiv) and  $\text{DCM}/\text{H}_2\text{O}$  (5/1) ( $c = 0.03$  M) in an undivided cell, constant current, 30 °C. <sup>b</sup> Determined by <sup>1</sup>H NMR analysis using 1,3,5-trimethylbenzene as the internal standard. Isolated yields were given in parentheses. <sup>c</sup> **2a** (0.75 mmol, 2.5 equiv). <sup>d</sup>  $c = 0.015$  M. <sup>e</sup> Under nitrogen atmosphere. <sup>f</sup> IKA ElectraSyn 2.0. I = 1 mA, 16 h,  $1.99$  F  $\text{mol}^{-1}$ .

**Table S7. Optimized reaction conditions for 12a<sup>a</sup>**

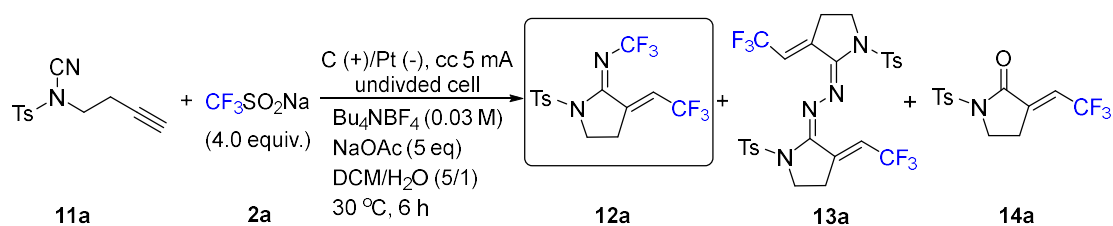

| Entry | Deviation from standard conditions                                             | Yield (%) <sup>b</sup> |            |            |
|-------|--------------------------------------------------------------------------------|------------------------|------------|------------|
|       |                                                                                | <b>12a</b>             | <b>13a</b> | <b>14a</b> |
| 1     | none                                                                           | 41 (38)                | < 1        | 4          |
| 2     | $\text{KH}_2\text{PO}_4$ (3 eq) instead of NaOAc (5 eq)                        | 30                     | 3          | 2          |
| 3     | NaOAc (3 eq) instead of NaOAc (5 eq)                                           | 36                     | 2          | 4          |
| 4     | $\text{Bu}_4\text{NClO}_4$ instead of $\text{Bu}_4\text{NBF}_4$                | 39                     | 2          | 5          |
| 5     | $\text{Bu}_4\text{NPF}_6$ instead of $\text{Bu}_4\text{NBF}_4$                 | 31                     | 2          | 10         |
| 6     | MeCN/ $\text{H}_2\text{O}$ (5/1) instead of DCM/ $\text{H}_2\text{O}$ (5/1)    | 12                     | 0          | 0          |
| 7     | Acetone/ $\text{H}_2\text{O}$ (5/1) instead of DCM/ $\text{H}_2\text{O}$ (5/1) | 0                      | 0          | 0          |
| 8     | DCM/ $\text{H}_2\text{O}$ (2/1) instead of DCM/ $\text{H}_2\text{O}$ (5/1)     | 37                     | 3          | 5          |
| 9     | DCM/ $\text{H}_2\text{O}$ (10/1) instead of DCM/ $\text{H}_2\text{O}$ (5/1)    | 27                     | 6          | 4          |
| 10    | C(+)/Ni(-) instead of C(+)/Pt(+)                                               | 31                     | 6          | 1          |
| 11    | C(+)/C(-) instead of C(+)/Pt(+)                                                | < 1                    | 0          | < 1        |
| 12    | C-plate(+)/Pt(-) instead of C(+)/Pt(+)                                         | 24                     | 9          | 1          |
| 13    | RVC(+)/Pt(-) instead of C(+)/Pt(+)                                             | 21                     | 4          | 1          |
| 14    | 2 mA, 8 h instead of 5 mA, 6 h                                                 | 19                     | 4          | 1          |
| 15    | 10 mA, 3 h instead of 5 mA, 6 h                                                | 37                     | 4          | 3          |
| 16    | cp = 5 V, 8 h instead of cc = 5 mA, 6 h                                        | 35                     | < 1        | 3          |
| 17    | under nitrogen atmosphere                                                      | 37                     | 5          | 4          |
| 18    | IKA ElectraSyn 2.0                                                             | 39                     | < 1        | < 1        |
| 19    | No electricity                                                                 | nd                     | nd         | nd         |

<sup>a</sup> Reaction conditions: **11a** (0.3 mmol), **2a** (1.2 mmol),  $\text{Bu}_4\text{NBF}_4$  (0.3 mmol), NaOAc (5 equiv) and DCM/ $\text{H}_2\text{O}$  (5/1) (c = 0.03 M) in an undivided cell with graphite rod ( $\Phi$  6 mm) and Pt plate cathode ( $10 \times 10 \times 0.1$  mm), constant current = 5 mA, 30 °C, 6 h. <sup>b</sup> Determined by  $^1\text{H}$  NMR analysis using 1,3,5-trimethylbenzene as the internal standard. Isolated yields were given in parentheses. **12a** (*E*-(C=N), *E*-(C=C))/**12a** (*E*-(C=N), *Z*-(C=C)) > 19/1; **13a** as an exclusive (*E*)-form. I = 5 mA, 6 h, 3.73 F mol<sup>-1</sup>.

### III. Preparation of Substrates

#### 1) Preparation of Substrates 1 and 8

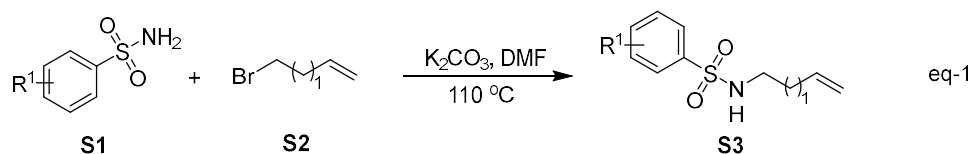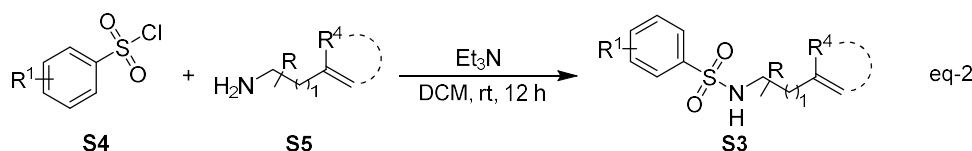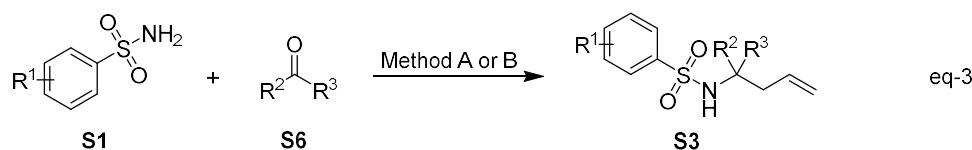

**Method A:** 1) PhCH<sub>2</sub>Br, Zn dust, THF, rt. 2) CH<sub>2</sub>=CHCH<sub>2</sub>ZnBr, 0 °C, 30 min  
**Method B:** SnCl<sub>2</sub>, NCS, allyltrimethylsilane, DCM, 6-20 h

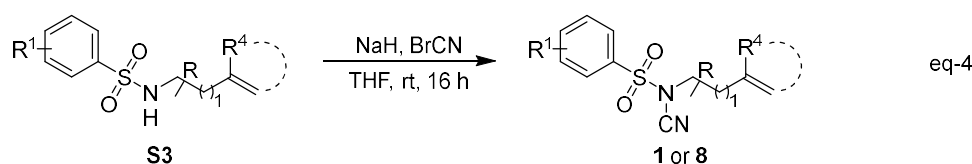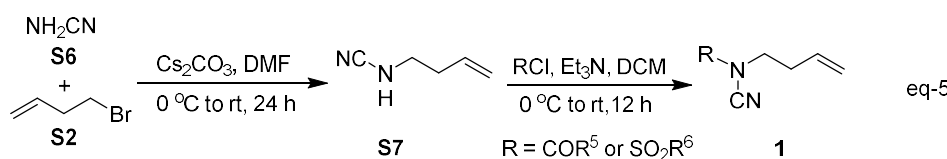

**Eq-1:** <sup>1</sup>To a round-bottomed flask equipped with a stirring bar was charged with aryl sulfonamide **S1** (1.2 equiv.), K<sub>2</sub>CO<sub>3</sub> (2 equiv.) and dry DMF (0.3 M). Bromide **S2** (1 equiv.) was slowly added and heated to 110 °C. The reaction was monitored by TLC. Upon completion, the reaction mixture was cooled to room temperature and added water and extracted with ethyl acetate. The combined organic layers were washed by brine and then dried over anhydrous Na<sub>2</sub>SO<sub>4</sub>, filtered, concentrated and eventually purified silica gel column chromatography with petroleum ether/ethyl acetate to give the desired compounds **S3**.

**Eq-2:** <sup>2</sup>To a solution of primary amine **S5** (1.0 equiv.) in DCM (0.5 M for amine) and triethylamine (1.5 equiv.) was added sulfonyl chloride **S4** (1.2 equiv.) in DCM (0.5 M for sulfonyl chloride) at 0 °C. The reaction mixture was warmed and stirred at room temperature. Upon completion, washed with HCl (0.5 M, aq.), dried over anhydrous Na<sub>2</sub>SO<sub>4</sub>, and concentrated under vacuum. The residue was purified by flash silica column chromatography to afford Ts-substituted amine **S3**.

**Eq-3: Method A:** <sup>3</sup>A Schlenk tube was charged with zinc dust (3 equiv.), evacuated, and backfilled with argon. Benzyl bromide (2 equiv.) and THF (0.5 M) were added. After the mixture was stirred at room temperature for 15 min, amide **S1** (1 equiv.) and aldehyde **S6** (1.5 equiv.) were successively added. The reaction mixture was stirred at room temperature until the amide disappeared as monitored by TLC. The mixture was quenched with brine and extracted with ethyl acetate. The organic layer was dried over Na<sub>2</sub>SO<sub>4</sub> and concentrated *in vacuo*. The residue was purified by column chromatography on silica gel or recrystallization to provide the desired product benzene sulfonyl



imine. Then to a solution of benzene sulfonyl imine in THF (0.2 M) at 0 °C, allyl zinc reagent was added slowly to the mixture. The reaction mixture was stirred at 0 °C. Upon completion, quenched with saturated NH<sub>4</sub>Cl and extracted with ethyl acetate. The organic layer was dried over Na<sub>2</sub>SO<sub>4</sub> and concentrated *in vacuo*. The residue was purified by column chromatography on silica gel or recrystallization to provide the desired product **S3**.

**Method B:**<sup>4</sup> To a solution of SnCl<sub>2</sub> (1.1 equiv.), TsNH<sub>2</sub> (1equiv.) and aldehyde or ketone (1 equiv.) in DCM (0.3 M) in an ice-bath, then NCS (1.1 equiv.) in DCM (0.2 M) was added, followed by allyl trimethylsilane (1.5 equiv.) The reaction mixture was stirred at room temperature. Upon completion, quenched with saturated NH<sub>4</sub>Cl and extracted with DCM. The organic layer was dried over Na<sub>2</sub>SO<sub>4</sub> and concentrated *in vacuo*. The residue was purified by column chromatography on silica gel or recrystallization to provide the desired product **S3**.

**Eq-4:**<sup>5</sup> A 50 mL flask with a stir-bar was charged with NaH (60% wt, 2 equiv.), which was then evacuated and backfilled with N<sub>2</sub> for three times. THF (0.3 M) was added and the solution was cooled to 0 °C. Then a THF solution of sulfonamide **S3** (1 equiv.) was added slowly to the solution and the reaction was kept at room temperature for 30 min. Then cyanogen bromide (2 equiv.) was added into the reaction solution. After the addition, the reaction mixture was stirred at room temperature overnight. Upon completion, saturated ammonium chloride was added and the mixture was extracted with EtOAc, and the combined organic layers were washed by brine and dried over Na<sub>2</sub>SO<sub>4</sub>, then filtered and concentrated under reduced pressure. The residue was purified by flash column chromatography to give the desired compounds **1** or **8**.

**Eq-5:**<sup>6</sup> To a flame-dried Schlenk tube equipped with a magnetic stir bar, a solution of NH<sub>2</sub>CN (**S6**, 3 equiv.) in DMF (0.25 M) was added, Cs<sub>2</sub>CO<sub>3</sub> (1 equiv) was added slowly in nitrogen atmosphere. Then **S2** (1 equiv.) was added dropwise *via* syringe to the solution at 0 °C. The tube was stirred at room temperature for 24 h. After completion, H<sub>2</sub>O was added to the solution. Then the aqueous phase was extracted with EtOAc, and the combined organic layers were washed by brine and dried over Na<sub>2</sub>SO<sub>4</sub>, then filtered and concentrated under reduced pressure. The residue was purified by flash chromatography to give the desired compounds **S7**. To a solution of cyanamide **S7** (1 equiv.) and Et<sub>3</sub>N (2 equiv.) in DCM (0.2 M) at 0 °C was slowly added acyl chloride (1.2 equiv.).<sup>7</sup> The resulting mixture was allowed to warm up to room temperature and stir for 12 h. Upon completion, the reaction mixture was quenched with H<sub>2</sub>O and the aqueous phase was extracted with DCM. The combined organic phases were washed with brine, dried over Na<sub>2</sub>SO<sub>4</sub>, filtered, and concentrated *in vacuo*. The residue was purified by flash chromatography to give the desired substrates.

Substrates **1aa-1ar**, **1aw** and **8i** were prepared according to the procedures of eq-1 and eq-4. Substrates **8a-8d**, **8k-8n**, were prepared according to the procedures of eq-2 and eq-4. Substrates **8e-8h**, **8j** were prepared according to the procedures of eq-3 and eq-4. Substrates **1as-1av**, **1ba**, **1ca**, **1fa**, **1ga** were prepared according to the procedures of eq-5.

## 2) Preparation of Substrates **11**

Substrates **11a** was prepared according to the known procedures<sup>8</sup> and similar procedure eq-4. Substrate **11b** was prepared according to the similar procedures of eq-3 and eq-4, and substrate **11d** was prepared according to the similar procedures of eq-2 and eq-4. Substrate **11c** was prepared according to the following procedures.

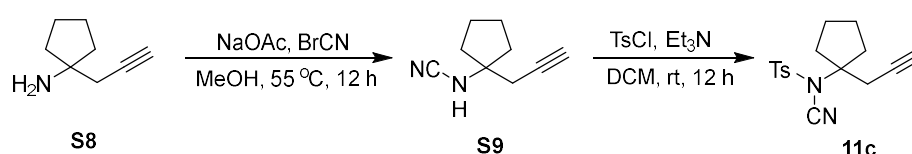

A solution of BrCN (1.2 equiv.) in MeOH (0.3 M) was slowly added to a mixture of aniline **S-8**<sup>9</sup> (1 equiv.) and NaOAc (3 equiv.) in MeOH (0.3 M) at 0 °C. The reaction mixture was stirred for 1 h, then was allowed to warm to room temperature and stir overnight. Upon completion, the reaction was neutralized with saturated aqueous NaHCO<sub>3</sub> and concentrated to a small volume. The residue was taken up to water and extracted with DCM. The combined organic extracts were washed with brine, dried over anhydrous Na<sub>2</sub>SO<sub>4</sub>, and concentrated. The product **S9** was purified by flash column chromatography. To a solution of primary amine **S9** (1.0 equiv.) in DCM (0.5 M for amine) and triethylamine (1.5 equiv.) was added tosyl chloride (1.2 equiv.) in DCM (0.5 M for TsCl) at 0 °C. The reaction mixture was warmed and stirred at room temperature. Upon completion, washed with HCl (1 M, aq.), dried over anhydrous Na<sub>2</sub>SO<sub>4</sub>, and concentrated under vacuum. The residue was purified by flash silica column chromatography to afford **11c**.

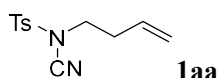

Purified by column chromatography (silica gel, EtOAc/Petroleum ether: 1/6) to afford the title compound (91% yield, 228 mg) as white solid, mp: 40 - 41 °C. <sup>1</sup>H NMR (400 MHz, CDCl<sub>3</sub>) δ 7.83 (d, *J* = 8.3 Hz, 2H), 7.41 (d, *J* = 8.2 Hz, 2H), 5.63 (ddt, *J* = 17.0, 10.2, 6.8 Hz, 1H), 5.15 – 5.06 (m, 2H), 3.44 (t, *J* = 7.2 Hz, 2H), 2.48 (s, 3H), 2.40 (q, *J* = 7.1 Hz, 2H). <sup>13</sup>C NMR (125 MHz, CDCl<sub>3</sub>) δ 146.56, 133.83, 132.09, 130.54, 127.96, 119.26, 108.57, 49.55, 32.17, 21.86. HRMS (ESI) *m/z*: [M + Na]<sup>+</sup> Calcd for C<sub>12</sub>H<sub>14</sub>N<sub>2</sub>NaO<sub>2</sub>S 273.0668; Found 273.0669.

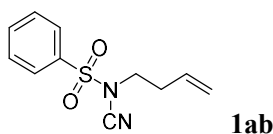

Purified by column chromatography (silica gel, EtOAc/Petroleum ether: 1/5) to afford the title compound (91% yield, 215 mg) as colorless oil. <sup>1</sup>H NMR (500 MHz, CDCl<sub>3</sub>) δ 7.96 (dd, *J* = 8.4, 1.1 Hz, 2H), 7.75 (t, *J* = 7.5 Hz, 1H), 7.63 (t, *J* = 7.9 Hz, 2H), 5.62 (ddt, *J* = 17.1, 10.2, 6.8 Hz, 1H), 5.14 – 5.06 (m, 2H), 3.47 (t, *J* = 7.2 Hz, 2H), 2.40 (q, *J* = 7.0 Hz, 2H). <sup>13</sup>C NMR (125 MHz, CDCl<sub>3</sub>) δ 136.81, 135.12, 131.97, 129.95, 127.85, 119.30, 108.35, 49.62, 32.11. HRMS (ESI) *m/z*: [M + H]<sup>+</sup> Calcd for C<sub>11</sub>H<sub>13</sub>N<sub>2</sub>O<sub>2</sub>S 237.0692; Found 237.0684.

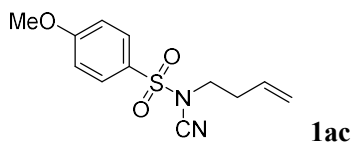

Purified by column chromatography (silica gel, EtOAc/Petroleum ether: 1/5) to afford the title compound (94% yield, 250 mg) as white solid, mp: 48 - 49 °C. <sup>1</sup>H NMR (500 MHz, CDCl<sub>3</sub>) δ 7.87 (d, *J* = 8.8 Hz, 2H), 7.05 (d, *J* = 9.0 Hz, 2H), 5.63 (ddt, *J* = 17.2, 10.3, 6.9 Hz, 1H), 5.15 – 5.07 (m, 2H), 3.91 (s, 3H), 3.43 (t, *J* = 7.2 Hz, 2H), 2.39 (q, *J* = 6.9 Hz, 2H). <sup>13</sup>C NMR (125 MHz, CDCl<sub>3</sub>) δ 164.88, 132.16, 130.30, 127.89, 119.16, 115.10, 108.71, 56.01, 49.39, 32.12. HRMS (ESI) *m/z*: [M + Na]<sup>+</sup> Calcd for C<sub>12</sub>H<sub>14</sub>N<sub>2</sub>NaO<sub>3</sub>S 289.0617; Found 289.0607.

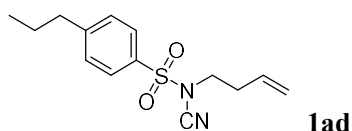

Purified by column chromatography (silica gel, EtOAc/Petroleum ether: 1/5) to afford the title compound (91% yield, 253 mg) as colorless oil.  $^1\text{H}$  NMR (400 MHz,  $\text{CDCl}_3$ )  $\delta$  7.85 (d,  $J = 8.3$  Hz, 2H), 7.41 (d,  $J = 8.3$  Hz, 2H), 5.62 (ddt,  $J = 17.1, 10.2, 6.8$  Hz, 1H), 5.14 – 5.04 (m, 2H), 3.45 (t,  $J = 7.2$  Hz, 2H), 2.70 (t,  $J = 7.4$  Hz, 2H), 2.40 (q,  $J = 7.0$  Hz, 2H), 1.74 – 1.63 (m, 2H), 0.96 (t,  $J = 7.3$  Hz, 3H).  $^{13}\text{C}$  NMR (125 MHz,  $\text{CDCl}_3$ )  $\delta$  151.08, 133.91, 132.06, 129.90, 127.89, 119.12, 108.50, 49.47, 37.97, 32.07, 24.10, 13.68. HRMS (ESI)  $m/z$ :  $[\text{M} + \text{H}]^+$  Calcd for  $\text{C}_{14}\text{H}_{19}\text{N}_2\text{O}_2\text{S}$  279.1162; Found 279.1158.

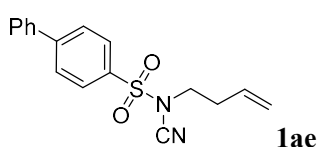

Purified by column chromatography (silica gel, EtOAc/Petroleum ether: 1/5) to afford the title compound (60% yield, 187 mg) as white solid, mp: 62 - 63 °C.  $^1\text{H}$  NMR (400 MHz,  $\text{CDCl}_3$ )  $\delta$  8.02 (d,  $J = 8.7$  Hz, 2H), 7.82 (d,  $J = 8.5$  Hz, 2H), 7.62 (d,  $J = 6.9$  Hz, 2H), 7.52 (t,  $J = 7.2$  Hz, 2H), 7.50 – 7.42 (m, 1H), 5.66 (ddt,  $J = 17.1, 10.2, 6.8$  Hz, 1H), 5.22 – 4.99 (m, 2H), 3.51 (t,  $J = 7.2$  Hz, 2H), 2.44 (q,  $J = 7.1$  Hz, 2H).  $^{13}\text{C}$  NMR (100 MHz,  $\text{CDCl}_3$ )  $\delta$  148.06, 138.56, 135.05, 132.01, 129.30, 129.17, 128.41, 127.47, 119.33, 108.46, 49.62, 32.17. HRMS (ESI)  $m/z$ :  $[\text{M} + \text{H}]^+$  Calcd for  $\text{C}_{17}\text{H}_{17}\text{N}_2\text{O}_2\text{S}$  313.1005; Found 313.0998.

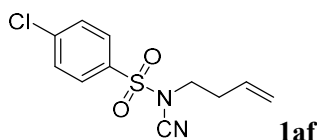

Purified by column chromatography (silica gel, EtOAc/Petroleum ether: 1/5) to afford the title compound (91% yield, 246 mg) as white solid, mp: 77 - 78 °C.  $^1\text{H}$  NMR (300 MHz,  $\text{CDCl}_3$ )  $\delta$  7.89 (d,  $J = 8.6$  Hz, 2H), 7.60 (d,  $J = 8.6$  Hz, 2H), 5.63 (ddt,  $J = 17.0, 10.2, 6.8$  Hz, 1H), 5.21 – 5.04 (m, 2H), 3.48 (t,  $J = 7.1$  Hz, 2H), 2.42 (q,  $J = 7.0$  Hz, 2H).  $^{13}\text{C}$  NMR (125 MHz,  $\text{CDCl}_3$ )  $\delta$  141.79, 134.94, 131.66, 130.06, 129.07, 119.23, 107.86, 49.52, 31.89. HRMS (ESI)  $m/z$ :  $[\text{M} + \text{Na}]^+$  Calcd for  $\text{C}_{11}\text{H}_{11}\text{ClN}_2\text{NaO}_2\text{S}$  293.0122; Found 293.0113.

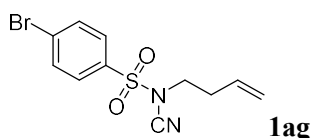

Purified by column chromatography (silica gel, EtOAc/Petroleum ether: 1/5) to afford the title compound (92% yield, 290 mg) as white solid, mp: 95 - 96 °C.  $^1\text{H}$  NMR (300 MHz,  $\text{CDCl}_3$ )  $\delta$  7.83 – 7.74 (m, 4H), 5.63 (ddt,  $J = 17.0, 10.1, 6.8$  Hz, 1H), 5.19 – 5.05 (m, 2H), 3.47 (t,  $J = 7.1$  Hz, 2H), 2.42 (q,  $J = 7.0$  Hz, 2H).  $^{13}\text{C}$  NMR (125 MHz,  $\text{CDCl}_3$ )  $\delta$

135.73, 133.31, 131.87, 130.67, 129.29, 119.52, 108.09, 49.78, 32.15. HRMS (ESI)  $m/z$ :  $[M + Na]^+$  Calcd for  $C_{11}H_{11}BrN_2NaO_2S$  336.9617; Found 336.9610.

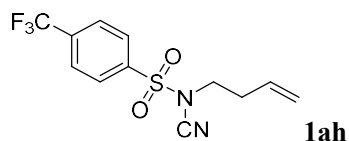

Purified by column chromatography (silica gel, EtOAc/Petroleum ether: 1/5) to afford the title compound (92% yield, 280 mg) as white solid, mp: 36 - 37 °C.  $^1H$  NMR (500 MHz,  $CDCl_3$ )  $\delta$  8.09 (d,  $J = 8.3$  Hz, 2H), 7.90 (d,  $J = 8.3$  Hz, 2H), 5.62 (ddt,  $J = 17.1, 10.2, 6.8$  Hz, 1H), 5.18 – 5.00 (m, 2H), 3.51 (t,  $J = 7.1$  Hz, 2H), 2.43 (q,  $J = 7.0$  Hz, 2H).  $^{13}C$  NMR (125 MHz,  $CDCl_3$ )  $\delta$  140.28, 136.66 (q,  $J = 33.2$  Hz), 131.75, 128.53, 127.15, 122.92 (q,  $J = 273.5$  Hz), 119.65, 50.03, 32.21. HRMS (ESI)  $m/z$ :  $[M + H]^+$  Calcd for  $C_{12}H_{12}F_3N_2O_2S$  305.0566; Found 305.0555.

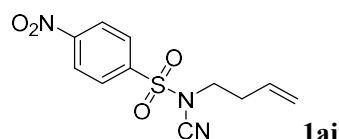

Purified by column chromatography (silica gel, EtOAc/Petroleum ether: 1/5) to afford the title compound (87% yield, 245 mg) as yellow solid, mp: 80 - 81 °C.  $^1H$  NMR (300 MHz,  $CDCl_3$ )  $\delta$  8.47 (d,  $J = 8.6$  Hz, 2H), 8.16 (d,  $J = 8.7$  Hz, 2H), 5.63 (ddt,  $J = 16.7, 9.8, 6.7$  Hz, 1H), 5.21 – 5.01 (m, 2H), 3.54 (t,  $J = 7.1$  Hz, 2H), 2.45 (q,  $J = 6.7$  Hz, 2H).  $^{13}C$  NMR (125 MHz,  $CDCl_3$ )  $\delta$  151.46, 142.14, 131.63, 129.34, 125.15, 119.85, 107.54, 50.22, 32.20. HRMS (ESI)  $m/z$ :  $[M + H]^+$  Calcd for  $C_{11}H_{12}N_3O_4S$  282.0543; Found 282.0547.

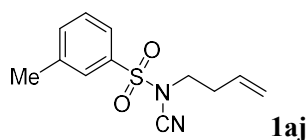

Purified by column chromatography (silica gel, EtOAc/Petroleum ether: 1/7) to afford the title compound (93% yield, 233 mg) as colorless oil.  $^1H$  NMR (300 MHz,  $CDCl_3$ )  $\delta$  7.78 – 7.70 (m, 2H), 7.58 – 7.46 (m, 2H), 5.63 (ddt,  $J = 17.0, 10.1, 6.8$  Hz, 1H), 5.15 – 5.05 (m, 2H), 3.45 (t,  $J = 7.2$  Hz, 2H), 2.47 (s, 3H), 2.40 (q,  $J = 7.0$  Hz, 2H).  $^{13}C$  NMR (125 MHz,  $CDCl_3$ )  $\delta$  140.41, 136.57, 135.85, 131.98, 129.67, 127.97, 124.97, 119.16, 108.37, 49.51, 32.09, 21.37. HRMS (ESI)  $m/z$ :  $[M + H]^+$  Calcd for  $C_{12}H_{15}N_2O_2S$  251.0849; Found 251.0841.

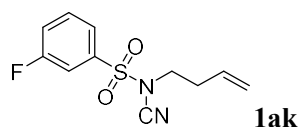

Purified by column chromatography (silica gel, EtOAc/Petroleum ether: 1/5) to afford the title compound (88% yield, 224 mg) as colorless oil.  $^1\text{H}$  NMR (500 MHz,  $\text{CDCl}_3$ )  $\delta$  7.79 – 7.75 (m, 1H), 7.68 – 7.61 (m, 2H), 7.49 – 7.43 (m, 1H), 5.63 (ddt,  $J = 17.1, 10.2, 6.8$  Hz, 1H), 5.15 – 5.08 (m, 2H), 3.50 (t,  $J = 7.1$  Hz, 2H), 2.43 (q,  $J = 7.0$  Hz, 2H).  $^{13}\text{C}$  NMR (125 MHz,  $\text{CDCl}_3$ )  $\delta$  163.61, 161.59, 138.51 (d,  $J = 6.6$  Hz), 131.84, 123.75, 122.47 (d,  $J = 21.1$  Hz), 119.47, 115.24 (d,  $J = 25.0$  Hz), 107.94, 49.86, 32.12. HRMS (ESI)  $m/z$ :  $[\text{M} + \text{H}]^+$  Calcd for  $\text{C}_{11}\text{H}_{12}\text{FN}_2\text{O}_2\text{S}$  255.0598; Found 255.0586.

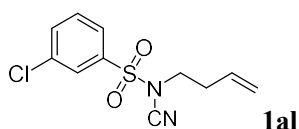

Purified by column chromatography (silica gel, EtOAc/Petroleum ether: 1/5) to afford the title compound (89% yield, 241 mg) as white solid, mp: 83 - 84 °C.  $^1\text{H}$  NMR (500 MHz,  $\text{CDCl}_3$ )  $\delta$  7.91 (s, 1H), 7.85 (d,  $J = 7.9$  Hz, 1H), 7.71 (d,  $J = 8.1$  Hz, 1H), 7.58 (t,  $J = 8.0$  Hz, 1H), 5.62 (ddt,  $J = 17.1, 10.2, 6.8$  Hz, 1H), 5.18 – 5.05 (m, 2H), 3.50 (t,  $J = 7.1$  Hz, 2H), 2.43 (q,  $J = 7.0$  Hz, 2H).  $^{13}\text{C}$  NMR (125 MHz,  $\text{CDCl}_3$ )  $\delta$  138.40, 136.27, 135.26, 131.85, 131.28, 127.81, 126.03, 119.59, 107.94, 49.91, 32.19. HRMS (ESI)  $m/z$ :  $[\text{M} + \text{Na}]^+$  Calcd for  $\text{C}_{11}\text{H}_{11}\text{ClN}_2\text{NaO}_2\text{S}$  293.0122; Found 293.0120.

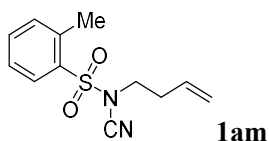

Purified by column chromatography (silica gel, EtOAc/Petroleum ether: 1/5) to afford the title compound (90% yield, 225 mg) as colorless oil.  $^1\text{H}$  NMR (400 MHz,  $\text{CDCl}_3$ )  $\delta$  8.00 (d,  $J = 7.9$  Hz, 1H), 7.60 (t,  $J = 7.9$  Hz, 1H), 7.42 – 7.38 (m, 2H), 5.54 (ddt,  $J = 17.0, 10.1, 6.8$  Hz, 1H), 5.13 – 5.03 (m, 2H), 3.43 (t,  $J = 7.1$  Hz, 2H), 2.72 (s, 3H), 2.40 (q,  $J = 7.4$  Hz, 2H).  $^{13}\text{C}$  NMR (125 MHz,  $\text{CDCl}_3$ )  $\delta$  138.93, 135.10, 135.01, 133.59, 132.04, 131.03, 126.90, 119.37, 108.30, 49.26, 32.17, 21.09. HRMS (ESI)  $m/z$ :  $[\text{M} + \text{H}]^+$  Calcd for  $\text{C}_{12}\text{H}_{15}\text{N}_2\text{O}_2\text{S}$  251.0849; Found 251.0843.

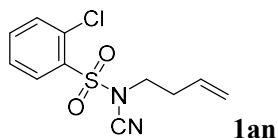

Purified by column chromatography (silica gel, EtOAc/Petroleum ether: 1/5) to afford the title compound (90% yield, 243 mg) as colorless oil.  $^1\text{H}$  NMR (400 MHz,  $\text{CDCl}_3$ )  $\delta$  8.15 (d,  $J = 8.2$  Hz, 1H), 7.69 – 7.58 (m, 2H), 7.53 – 7.45 (m, 1H), 5.63 (ddt,  $J = 17.0, 10.1, 6.9$  Hz, 1H), 5.21 – 5.05 (m, 2H), 3.56 (t,  $J = 7.2$  Hz, 2H), 2.46 (q,  $J = 7.0$  Hz, 2H).  $^{13}\text{C}$  NMR (125 MHz,  $\text{CDCl}_3$ )  $\delta$  135.98, 134.33, 133.11, 132.89, 132.70, 131.90, 127.65, 119.48, 107.68, 50.12, 32.34. HRMS (ESI)  $m/z$ :  $[\text{M} + \text{Na}]^+$  Calcd for  $\text{C}_{11}\text{H}_{11}\text{ClN}_2\text{NaO}_2\text{S}$  293.0122; Found 293.0121.

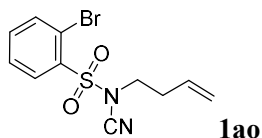

Purified by column chromatography (silica gel, EtOAc/Petroleum ether: 1/5) to afford the title compound (90% yield, 284 mg) as colorless oil.  $^1\text{H}$  NMR (400 MHz,  $\text{CDCl}_3$ )  $\delta$  8.21 – 8.15 (m, 1H), 7.88 – 7.75 (m, 1H), 7.60 – 7.42 (m, 2H), 5.64 (ddt,  $J = 17.0, 10.2, 6.8$  Hz, 1H), 5.23 – 4.95 (m, 2H), 3.56 (t,  $J = 7.2$  Hz, 2H), 2.47 (q,  $J = 7.0$  Hz, 2H).  $^{13}\text{C}$  NMR (125 MHz,  $\text{CDCl}_3$ )  $\delta$  136.31, 135.87, 133.36, 131.90, 128.20, 121.05, 119.48, 107.74, 50.13, 32.30. HRMS (ESI)  $m/z$ :  $[\text{M} + \text{Na}]^+$  Calcd for  $\text{C}_{11}\text{H}_{11}\text{BrN}_2\text{NaO}_2\text{S}$  336.9617; Found 336.9609.

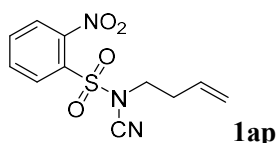

Purified by column chromatography (silica gel, EtOAc/Petroleum ether: 1/5) to afford the title compound (85% yield, 239 mg) as yellow solid, mp: 59 - 60 °C.  $^1\text{H}$  NMR (300 MHz,  $\text{CDCl}_3$ )  $\delta$  8.25 – 8.20 (m, 1H), 7.95 – 7.80 (m, 3H), 5.73 (ddt,  $J = 17.0, 10.1, 6.9$  Hz, 1H), 5.27 – 5.13 (m, 2H), 3.74 (t,  $J = 7.1$  Hz, 2H), 2.53 (q,  $J = 7.0$  Hz, 2H).  $^{13}\text{C}$  NMR (125 MHz,  $\text{CDCl}_3$ )  $\delta$  147.97, 136.27, 132.88, 132.45, 131.91, 129.94, 125.25, 119.68, 107.38, 50.77, 32.58. HRMS (ESI)  $m/z$ :  $[\text{M} + \text{H}]^+$  Calcd for  $\text{C}_{11}\text{H}_{12}\text{N}_3\text{O}_4\text{S}$  282.0543; Found 282.0533.

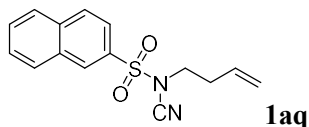

Purified by column chromatography (silica gel, EtOAc/Petroleum ether: 1/10) to afford the title compound (87% yield, 249 mg) as white solid, mp: 47 - 48 °C.  $^1\text{H}$  NMR (300 MHz,  $\text{CDCl}_3$ )  $\delta$  8.53 (s, 1H), 8.05 (t,  $J = 9.1$  Hz, 2H), 7.97 (d,  $J = 8.0$  Hz, 1H), 7.90 (dd,  $J = 8.7, 2.0$  Hz, 1H), 7.78 – 7.66 (m, 2H), 5.62 (ddt,  $J = 17.0, 10.1, 6.8$  Hz, 1H), 5.15 – 5.01 (m, 2H), 3.51 (t,  $J = 7.2$  Hz, 2H), 2.42 (q,  $J = 7.1$  Hz, 2H).  $^{13}\text{C}$  NMR (125 MHz,  $\text{CDCl}_3$ )  $\delta$  135.76, 133.47, 131.99, 130.46, 130.21, 130.11, 129.67, 128.38, 128.18, 121.91, 119.29, 108.47, 49.63, 32.16. HRMS (ESI)  $m/z$ :  $[\text{M} + \text{H}]^+$  Calcd for  $\text{C}_{15}\text{H}_{15}\text{N}_2\text{O}_2\text{S}$  287.0849; Found 287.0849.

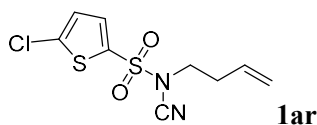

Purified by column chromatography (silica gel, EtOAc/Petroleum ether: 1/10) to afford the title compound (89% yield, 246 mg) as white solid, mp: 43 - 44 °C.  $^1\text{H}$  NMR (500 MHz,  $\text{CDCl}_3$ )  $\delta$  7.61 (d,  $J = 4.1$  Hz, 1H), 7.06 (d,  $J = 4.1$  Hz, 1H), 5.67 (ddt,  $J = 17.0, 10.1, 6.8$  Hz, 1H), 5.21 – 5.10 (m, 2H), 3.52 (t,  $J = 7.1$  Hz, 2H), 2.46 (q,  $J = 7.0$  Hz, 2H).  $^{13}\text{C}$  NMR (125 MHz,  $\text{CDCl}_3$ )  $\delta$  141.35, 134.92, 133.57, 131.79, 127.86, 119.54, 107.62, 50.04, 32.10. HRMS (ESI)  $m/z$ :  $[\text{M} + \text{Na}]^+$  Calcd for  $\text{C}_9\text{H}_9\text{ClN}_2\text{NaO}_2\text{S}_2$  298.9686; Found 298.9673.

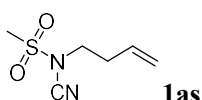

Purified by column chromatography (silica gel, EtOAc/Petroleum ether: 1/2) to afford the title compound (30% yield, 52 mg) as colorless oil.  $^1\text{H}$  NMR (400 MHz,  $\text{CDCl}_3$ )  $\delta$  5.77 (ddt,  $J = 17.1, 10.2, 6.9$  Hz, 1H), 5.33 – 5.18 (m, 2H), 3.63 (t,  $J = 7.0$  Hz, 2H), 3.22 (s, 3H), 2.54 (q,  $J = 6.9$  Hz, 2H).  $^{13}\text{C}$  NMR (125 MHz,  $\text{CDCl}_3$ )  $\delta$  132.25, 119.59, 107.96, 49.72, 40.84, 32.40. HRMS (ESI)  $m/z$ :  $[\text{M} + \text{H}]^+$  Calcd for  $\text{C}_6\text{H}_{11}\text{N}_2\text{O}_2\text{S}$  175.0536; Found 175.0540.

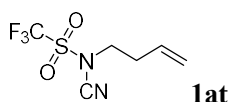

Purified by column chromatography (silica gel, EtOAc/Petroleum ether: 1/2) to afford the title compound (67% yield, 153 mg) as yellow oil.  $^1\text{H}$  NMR (400 MHz,  $\text{CDCl}_3$ )  $\delta$  5.74 (ddt,  $J = 17.1, 10.2, 6.9$  Hz, 1H), 5.42 – 5.16 (m, 2H), 3.76 (t,  $J = 7.0$  Hz, 2H), 2.59 (q,  $J = 7.0$  Hz, 2H).  $^{13}\text{C}$  NMR (125 MHz,  $\text{CDCl}_3$ )  $\delta$  130.91, 120.74, 119.25 (q,  $J = 322.9$  Hz), 104.92, 52.50, 32.36. HRMS (ESI)  $m/z$ :  $[\text{M} + \text{H}]^+$  Calcd for  $\text{C}_6\text{H}_8\text{F}_3\text{N}_2\text{O}_2\text{S}$  229.0253; Found 229.0238.

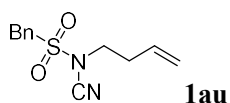

Purified by column chromatography (silica gel, EtOAc/Petroleum ether: 1/5) to afford the title compound (25% yield, 63 mg) as white solid, mp: 61 - 62 °C.  $^1\text{H}$  NMR (400 MHz,  $\text{CDCl}_3$ )  $\delta$  7.48 – 7.43 (m, 5H), 5.68 – 5.54 (m, 1H), 5.17 – 5.10 (m, 2H), 4.56 (s, 2H), 3.12 (t,  $J = 7.2$  Hz, 2H), 2.30 (q,  $J = 7.1$  Hz, 2H).  $^{13}\text{C}$  NMR (125 MHz,  $\text{CDCl}_3$ )  $\delta$  132.05, 130.95, 130.04, 129.44, 126.37, 119.39, 108.14, 59.82, 50.87, 32.68. HRMS (ESI)  $m/z$ :  $[\text{M} + \text{H}]^+$  Calcd for  $\text{C}_{12}\text{H}_{15}\text{N}_2\text{O}_2\text{S}$  251.0849; Found 251.0854.

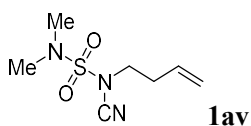

Purified by column chromatography (silica gel, EtOAc/Petroleum ether: 1/2) to afford the title compound (25% yield, 51 mg) as colorless oil.  $^1\text{H}$  NMR (400 MHz,  $\text{CDCl}_3$ )  $\delta$  5.77 (ddt,  $J = 17.0, 10.1, 6.8$  Hz, 1H), 5.27 – 5.16 (m, 2H), 3.54 (t,  $J = 7.2$  Hz, 2H), 3.03 (s, 6H), 2.52 (q,  $J = 7.4$  Hz, 2H).  $^{13}\text{C}$  NMR (125 MHz,  $\text{CDCl}_3$ )  $\delta$  132.48, 119.34, 109.53, 50.63, 38.88, 32.56. HRMS (ESI)  $m/z$ :  $[\text{M} + \text{H}]^+$  Calcd for  $\text{C}_7\text{H}_{14}\text{N}_3\text{O}_2\text{S}$  204.0801; Found 204.0798.

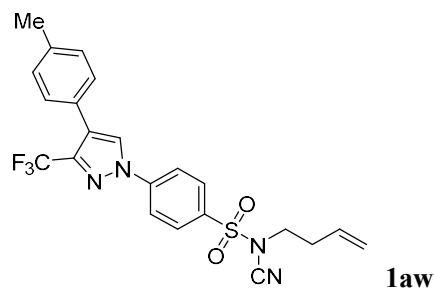

Purified by column chromatography (silica gel, EtOAc/Petroleum ether: 1/5) to afford the title compound (91% yield, 419 mg) as white solid, mp: 105 - 106 °C. <sup>1</sup>H NMR (400 MHz, CDCl<sub>3</sub>) δ 7.92 (d, *J* = 8.8 Hz, 2H), 7.59 (d, *J* = 8.8 Hz, 2H), 7.21 (d, *J* = 7.9 Hz, 2H), 7.13 (d, *J* = 8.1 Hz, 2H), 6.76 (s, 1H), 5.61 (ddt, *J* = 17.0, 10.2, 6.8 Hz, 1H), 5.16 – 5.05 (m, 2H), 3.48 (t, *J* = 7.1 Hz, 2H), 2.42 (q, *J* = 7.0 Hz, 2H), 2.4 (s, 3H). <sup>13</sup>C NMR (125 MHz, CDCl<sub>3</sub>) δ 145.60, 144.99 (q, *J* = 38.5 Hz), 144.48, 140.28, 135.81, 131.87, 130.02, 128.96, 128.84, 125.84, 125.63, 121.03 (q, *J* = 269.4 Hz), 119.57, 108.01, 107.00, 49.81, 32.12, 21.43. HRMS (ESI) *m/z*: [M + H]<sup>+</sup> Calcd for C<sub>22</sub>H<sub>20</sub>F<sub>3</sub>N<sub>4</sub>O<sub>2</sub>S 461.1254; Found 461.1264.

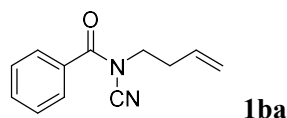

Purified by column chromatography (silica gel, EtOAc/Petroleum ether: 1/3) to afford the title compound (87% yield, 176 mg) as colorless oil. <sup>1</sup>H NMR (500 MHz, CDCl<sub>3</sub>) δ 7.85 – 7.72 (m, 2H), 7.59 (t, *J* = 7.5 Hz, 1H), 7.48 (t, *J* = 7.7 Hz, 2H), 5.82 (ddt, *J* = 17.1, 10.2, 6.9 Hz, 1H), 5.31 – 5.14 (m, 2H), 3.84 (t, *J* = 7.0 Hz, 2H), 2.57 (q, *J* = 6.9 Hz, 2H). <sup>13</sup>C NMR (125 MHz, CDCl<sub>3</sub>) δ 168.55, 133.20, 133.07, 131.23, 128.71, 128.64, 118.99, 111.14, 46.89, 32.07.

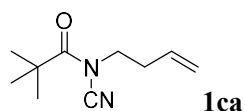

Purified by column chromatography (silica gel, EtOAc/Petroleum ether: 1/5) to afford the title compound (95% yield, 171 mg) as colorless oil. <sup>1</sup>H NMR (500 MHz, CDCl<sub>3</sub>) δ 5.73 (ddt, *J* = 17.1, 10.1, 7.0 Hz, 1H), 5.20 – 5.10 (m, 2H), 3.67 (t, *J* = 6.9 Hz, 2H), 2.43 (q, *J* = 6.9 Hz, 2H), 1.39 (s, 9H). <sup>13</sup>C NMR (125 MHz, CDCl<sub>3</sub>) δ 176.89, 133.29, 118.71, 111.57, 47.62, 41.17, 32.06, 27.17. HRMS (ESI) *m/z*: [M + H]<sup>+</sup> Calcd for C<sub>10</sub>H<sub>17</sub>N<sub>2</sub>O<sub>2</sub> 181.1335; Found 181.1330.

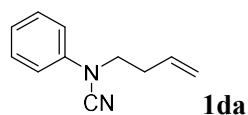

Purified by column chromatography (silica gel, EtOAc/Petroleum ether: 1/10) to afford the title compound (88% yield, 151 mg) as a colorless oil. <sup>1</sup>H NMR (500 MHz, CDCl<sub>3</sub>) δ 7.40 – 7.31 (m, 2H), 7.16 – 7.04 (m, 3H), 5.84 (ddt, *J* = 17.1, 10.2, 6.8 Hz, 1H), 5.28 – 5.11 (m, 2H), 3.66 (t, *J* = 7.3 Hz, 2H), 2.58 (q, *J* = 7.0 Hz, 2H). <sup>13</sup>C NMR (100 MHz, CDCl<sub>3</sub>) δ 139.95, 133.16, 129.80, 123.76, 118.70, 116.12, 113.62, 48.95, 31.78.



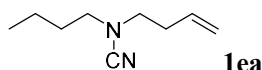

Purified by column chromatography (silica gel, EtOAc/Petroleum ether: 1/10) to afford the title compound (44% yield, 67 mg) as a colorless oil.  $^1\text{H NMR}$  (300 MHz,  $\text{CDCl}_3$ )  $\delta$  5.85 – 5.69 (m, 1H), 5.22 – 5.05 (m, 2H), 3.05 (t,  $J$  = 7.2 Hz, 2H), 2.98 (t,  $J$  = 6.0 Hz, 2H), 2.47 – 2.32 (m, 2H), 1.67 – 1.54 (m, 2H), 1.46 – 1.29 (m, 2H), 0.93 (t,  $J$  = 7.3 Hz, 3H).  $^{13}\text{C NMR}$  (125 MHz,  $\text{CDCl}_3$ )  $\delta$  133.81, 117.83, 117.62, 51.32, 50.95, 32.08, 29.68, 19.67, 13.62.

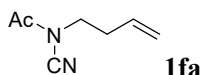

Purified by column chromatography (silica gel, EtOAc/Petroleum ether: 1/2) to afford the title compound (78% yield, 108 mg) as colorless oil.  $^1\text{H NMR}$  (500 MHz,  $\text{CDCl}_3$ )  $\delta$  5.71 (ddt,  $J$  = 17.1, 10.2, 6.9 Hz, 1H), 5.18 – 5.09 (m, 2H), 3.61 (t,  $J$  = 7.0 Hz, 2H), 2.40 (q,  $J$  = 7.0 Hz, 2H), 2.36 (s, 3H).  $^{13}\text{C NMR}$  (125 MHz,  $\text{CDCl}_3$ )  $\delta$  169.26, 132.84, 118.70, 110.79, 45.23, 31.91, 22.14. HRMS (ESI)  $m/z$ :  $[\text{M} + \text{H}]^+$  Calcd for  $\text{C}_7\text{H}_{11}\text{N}_2\text{O}$  139.0866; Found 139.0867.

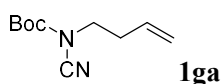

Purified by column chromatography (silica gel, EtOAc/Petroleum ether: 1/5) to afford the title compound (91% yield, 179 mg) as colorless oil.  $^1\text{H NMR}$  (400 MHz,  $\text{CDCl}_3$ )  $\delta$  5.74 (ddt,  $J$  = 17.1, 10.2, 6.9 Hz, 1H), 5.25 – 5.01 (m, 2H), 3.53 (t,  $J$  = 7.0 Hz, 2H), 2.43 (q,  $J$  = 7.0 Hz, 2H), 1.51 (s, 9H).  $^{13}\text{C NMR}$  (100 MHz,  $\text{CDCl}_3$ )  $\delta$  150.99, 132.95, 118.75, 109.64, 85.55, 46.96, 32.27, 27.88. HRMS (ESI)  $m/z$ :  $[\text{M} + \text{H}]^+$  Calcd for  $\text{C}_{10}\text{H}_{17}\text{N}_2\text{O}_2$  197.1285; Found 197.1272.

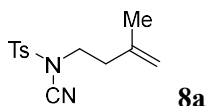

Purified by column chromatography (silica gel, EtOAc/Petroleum ether: 1/8) to afford the title compound (91% yield, 241 mg) as colorless oil.  $^1\text{H NMR}$  (400 MHz,  $\text{CDCl}_3$ )  $\delta$  7.84 (d,  $J$  = 8.4 Hz, 2H), 7.42 (d,  $J$  = 8.1 Hz, 2H), 4.83 (s, 1H), 4.72 (s, 1H), 3.50 (t,  $J$  = 7.4 Hz, 2H), 2.49 (s, 3H), 2.35 (t,  $J$  = 7.4 Hz, 2H), 1.70 (s, 3H).  $^{13}\text{C NMR}$  (125 MHz,  $\text{CDCl}_3$ )  $\delta$  146.57, 139.70, 133.78, 130.54, 127.93, 114.17, 108.49, 48.40, 35.79, 22.07, 21.85. HRMS (ESI)  $m/z$ :  $[\text{M} + \text{H}]^+$  Calcd for  $\text{C}_{13}\text{H}_{17}\text{N}_2\text{O}_2\text{S}$  265.1005; Found 265.1015.

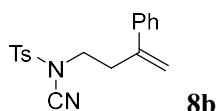

Purified by column chromatography (silica gel, EtOAc/Petroleum ether: 1/8) to afford the title compound (65% yield, 212 mg) as colorless oil.  $^1\text{H NMR}$  (400 MHz,  $\text{CDCl}_3$ )  $\delta$  7.78 (d,  $J$  = 8.2 Hz, 2H), 7.37 (d,  $J$  = 7.7 Hz, 2H), 7.35 – 7.26 (m, 5H), 5.38 (s, 1H), 5.13 (s, 1H), 3.46 (t,  $J$  = 7.5 Hz, 2H), 2.86 (t,  $J$  = 7.5 Hz, 2H), 2.47 (s, 3H).  $^{13}\text{C NMR}$  (100 MHz,  $\text{CDCl}_3$ )  $\delta$  146.51, 142.73, 139.10, 133.77, 130.53, 128.71, 128.14, 127.90, 126.07, 116.20, 108.58, 49.04, 34.10, 21.88. HRMS (ESI)  $m/z$ :  $[\text{M} + \text{H}]^+$  Calcd for  $\text{C}_{18}\text{H}_{19}\text{N}_2\text{O}_2\text{S}$  327.1162; Found 327.1166.

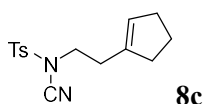

Purified by column chromatography (silica gel, EtOAc/Petroleum ether: 1/6) to afford the title compound (71% yield, 206 mg) as colorless oil.  $^1\text{H NMR}$  (400 MHz,  $\text{CDCl}_3$ )  $\delta$  7.82 (d,  $J = 8.2$  Hz, 2H), 7.41 (d,  $J = 8.0$  Hz, 2H), 5.39 (brs, 1H), 3.48 (t,  $J = 7.3$  Hz, 2H), 2.48 (s, 3H), 2.43 – 2.39 (m, 2H), 2.30 – 2.22 (m, 2H), 2.20 – 2.11 (m, 2H), 1.88 – 1.76 (m, 2H).  $^{13}\text{C NMR}$  (100 MHz,  $\text{CDCl}_3$ )  $\delta$  146.47, 138.23, 133.84, 130.51, 127.89, 127.83, 108.50, 48.52, 34.71, 32.61, 29.55, 23.27, 21.87. HRMS (ESI)  $m/z$ :  $[\text{M} + \text{H}]^+$  Calcd for  $\text{C}_{15}\text{H}_{19}\text{N}_2\text{O}_2\text{S}$  291.1162; Found 291.1168.

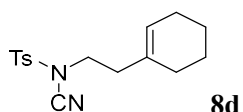

Purified by column chromatography (silica gel, EtOAc/Petroleum ether: 1/8) to afford the title compound (93% yield, 283 mg) as white solid, mp: 71 - 72 °C.  $^1\text{H NMR}$  (500 MHz,  $\text{CDCl}_3$ )  $\delta$  7.82 (d,  $J = 8.3$  Hz, 2H), 7.40 (d,  $J = 8.1$  Hz, 2H), 5.43 (brs, 1H), 3.44 (t,  $J = 7.3$  Hz, 2H), 2.47 (s, 3H), 2.24 (t,  $J = 7.2$  Hz, 2H), 2.00 – 1.91 (m, 2H), 1.88 – 1.81 (m, 2H), 1.61 – 1.55 (m, 2H), 1.53 – 1.47 (m, 2H).  $^{13}\text{C NMR}$  (125 MHz,  $\text{CDCl}_3$ )  $\delta$  146.40, 134.04, 131.87, 130.50, 127.90, 125.75, 108.64, 48.75, 36.27, 27.93, 25.29, 22.71, 22.08, 21.85. HRMS (ESI)  $m/z$ :  $[\text{M} + \text{H}]^+$  Calcd for  $\text{C}_{16}\text{H}_{21}\text{N}_2\text{O}_2\text{S}$  305.1318; Found 305.1323.

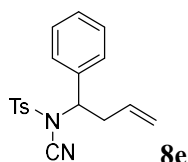

Purified by column chromatography (silica gel, EtOAc/Petroleum ether: 1/8) to afford the title compound (90% yield, 294 mg) as white solid, mp: 89 - 90 °C.  $^1\text{H NMR}$  (500 MHz,  $\text{CDCl}_3$ )  $\delta$  7.58 (d,  $J = 8.4$  Hz, 2H), 7.27 – 7.18 (m, 7H), 5.59 – 5.51 (m, 1H), 5.18 (d,  $J = 17.0$  Hz, 1H), 5.04 (d,  $J = 10.2$  Hz, 1H), 4.85 (dd,  $J = 9.2, 6.5$  Hz, 1H), 2.83 – 2.73 (m, 1H), 2.70 – 2.62 (m, 1H), 2.40 (s, 3H).  $^{13}\text{C NMR}$  (125 MHz,  $\text{CDCl}_3$ )  $\delta$  146.01, 137.12, 134.37, 131.95, 130.00, 128.97, 128.00, 126.92, 119.84, 107.79, 63.74, 38.54, 21.80. HRMS (ESI)  $m/z$ :  $[\text{M} + \text{Na}]^+$  Calcd for  $\text{C}_{18}\text{H}_{18}\text{N}_2\text{NaO}_2\text{S}$  349.0981; Found 349.0975.

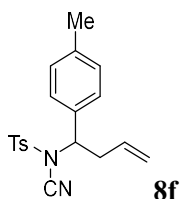

Purified by column chromatography (silica gel, EtOAc/Petroleum ether: 1/8) to afford the title compound (83% yield, 283 mg) as colorless oil.  $^1\text{H NMR}$  (400 MHz,  $\text{CDCl}_3$ )  $\delta$  7.60 (d,  $J = 8.3$  Hz, 2H), 7.21 (d,  $J = 8.2$  Hz, 2H), 7.08 (d,  $J = 8.2$  Hz, 2H), 7.04 (d,  $J = 8.1$  Hz, 2H), 5.59 – 5.48 (m, 1H), 5.16 (d,  $J = 17.1$  Hz, 1H), 5.02 (d,  $J = 10.1$  Hz, 1H),

4.82 (dd,  $J = 9.0, 6.8$  Hz, 1H), 2.82 – 2.70 (m, 1H), 2.69 – 2.60 (m, 1H), 2.41 (s, 3H), 2.30 (s, 3H).  $^{13}\text{C}$  NMR (125 MHz,  $\text{CDCl}_3$ )  $\delta$  145.95, 138.92, 134.43, 133.97, 132.05, 129.94, 129.53, 127.95, 126.84, 119.62, 107.76, 63.60, 38.35, 21.73, 21.16. HRMS (ESI)  $m/z$ :  $[\text{M} + \text{Na}]^+$  Calcd for  $\text{C}_{19}\text{H}_{20}\text{N}_2\text{NaO}_2\text{S}$  363.1138; Found 363.1136.

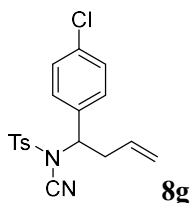

Purified by column chromatography (silica gel, EtOAc/Petroleum ether: 1/8) to afford the title compound (80% yield, 289 mg) as white solid, mp: 80 - 81 °C.  $^1\text{H}$  NMR (400 MHz,  $\text{CDCl}_3$ )  $\delta$  7.59 (d,  $J = 8.4$  Hz, 2H), 7.24 (d,  $J = 8.2$  Hz, 2H), 7.21 (d,  $J = 8.5$  Hz, 2H), 7.13 (d,  $J = 8.5$  Hz, 2H), 5.57 – 5.47 (m, 1H), 5.17 (d,  $J = 16.0$  Hz, 1H), 5.04 (d,  $J = 10.2$  Hz, 1H), 4.82 (dd,  $J = 9.0, 6.7$  Hz, 1H), 2.81 – 2.69 (m, 1H), 2.67 – 2.58 (m, 1H), 2.43 (s, 3H).  $^{13}\text{C}$  NMR (125 MHz,  $\text{CDCl}_3$ )  $\delta$  146.33, 135.56, 134.95, 134.21, 131.48, 130.07, 129.09, 128.28, 127.89, 120.09, 107.56, 62.85, 38.32, 21.75. HRMS (ESI)  $m/z$ :  $[\text{M} + \text{H}]^+$  Calcd for  $\text{C}_{18}\text{H}_{18}\text{ClN}_2\text{O}_2\text{S}$  361.0772; Found 361.0771.

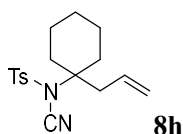

Purified by column chromatography (silica gel, EtOAc/Petroleum ether: 1/5) to afford the title compound (20% yield, 64 mg) as white solid, mp: 69 - 70 °C.  $^1\text{H}$  NMR (500 MHz,  $\text{CDCl}_3$ )  $\delta$  7.89 (d,  $J = 8.2$  Hz, 2H), 7.40 (d,  $J = 8.0$  Hz, 2H), 5.81 – 5.73 (m, 1H), 5.24 – 5.14 (m, 2H), 2.64 (d,  $J = 7.3$  Hz, 2H), 2.49 (s, 3H), 2.15 – 1.98 (m, 2H), 1.81 – 1.67 (m, 2H), 1.53 – 1.45 (m, 2H), 1.43 – 1.30 (m, 4H).  $^{13}\text{C}$  NMR (125 MHz,  $\text{CDCl}_3$ )  $\delta$  146.00, 136.47, 131.25, 130.21, 128.06, 120.54, 109.29, 71.69, 42.87, 34.81, 24.96, 22.10, 21.87. HRMS (ESI)  $m/z$ :  $[\text{M} + \text{H}]^+$  Calcd for  $\text{C}_{17}\text{H}_{23}\text{N}_2\text{O}_2\text{S}$  319.1475; Found 319.1471.

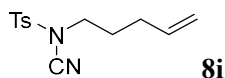

Purified by column chromatography (silica gel, EtOAc/Petroleum ether: 1/5) to afford the title compound (90% yield, 238 mg) as colorless oil.  $^1\text{H}$  NMR (400 MHz,  $\text{CDCl}_3$ )  $\delta$  7.83 (d,  $J = 8.3$  Hz, 2H), 7.41 (d,  $J = 8.3$  Hz, 2H), 5.77 – 5.62 (m, 1H), 5.07 – 4.97 (m, 2H), 3.37 (t,  $J = 7.3$  Hz, 2H), 2.48 (s, 3H), 2.08 (q,  $J = 7.0$  Hz, 2H), 1.83 – 1.69 (m, 2H).  $^{13}\text{C}$  NMR (125 MHz,  $\text{CDCl}_3$ )  $\delta$  146.54, 136.11, 133.72, 130.57, 127.91, 116.54, 108.69, 49.67, 29.98, 27.00, 21.88. HRMS (ESI)  $m/z$ :  $[\text{M} + \text{H}]^+$  Calcd for  $\text{C}_{13}\text{H}_{17}\text{N}_2\text{O}_2\text{S}$  265.1005; Found 265.0992.

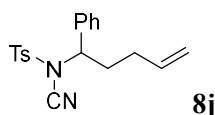

Purified by column chromatography (silica gel, EtOAc/Petroleum ether: 1/8) to afford the title compound (73% yield, 249 mg) as colorless oil.  $^1\text{H}$  NMR (500 MHz,  $\text{CDCl}_3$ )  $\delta$  7.53 (d,  $J = 8.4$  Hz, 2H), 7.25 – 7.23 (m, 1H), 7.22 – 7.18 (m, 2H), 7.18 – 7.16 (m, 2H), 7.16 – 7.14 (m, 2H), 5.78 – 5.68 (m, 1H), 5.06 – 4.98 (m, 2H), 4.84 – 4.75 (m, 1H), 2.38 (s, 3H), 2.14 – 2.07 (m, 1H), 2.07 – 1.97 (m, 3H).  $^{13}\text{C}$  NMR (125 MHz,  $\text{CDCl}_3$ )  $\delta$  145.96, 137.23, 136.02, 134.29, 129.96, 128.91, 127.86, 126.89, 116.65, 107.88, 63.40, 33.50, 30.02, 21.72. HRMS (ESI)  $m/z$ :  $[\text{M} + \text{H}]^+$  Calcd for  $\text{C}_{19}\text{H}_{21}\text{N}_2\text{O}_2\text{S}$  341.1318; Found 341.1315.

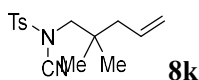

Purified by column chromatography (silica gel, EtOAc/Petroleum ether: 1/8) to afford the title compound (83% yield, 243 mg) as colorless oil.  $^1\text{H}$  NMR (500 MHz,  $\text{CDCl}_3$ )  $\delta$  7.83 (d,  $J = 8.2$  Hz, 2H), 7.41 (d,  $J = 8.2$  Hz, 2H), 5.76 (ddt,  $J = 17.4, 10.1, 7.5$  Hz, 1H), 5.14 – 5.01 (m, 2H), 3.19 (s, 2H), 2.48 (s, 3H), 2.07 (d,  $J = 7.4$  Hz, 2H), 1.01 (s, 6H).  $^{13}\text{C}$  NMR (125 MHz,  $\text{CDCl}_3$ )  $\delta$  146.51, 133.81, 133.34, 130.54, 128.08, 118.96, 110.70, 60.50, 44.30, 35.88, 24.87, 21.90. HRMS (ESI)  $m/z$ :  $[\text{M} + \text{H}]^+$  Calcd for  $\text{C}_{15}\text{H}_{21}\text{N}_2\text{O}_2\text{S}$  293.1318; Found 293.1311.

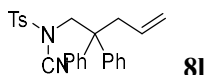

Purified by column chromatography (silica gel, EtOAc/Petroleum ether: 1/5) to afford the title compound (73% yield, 304 mg) as white solid, mp: 108 - 109 °C.  $^1\text{H}$  NMR (500 MHz,  $\text{CDCl}_3$ )  $\delta$  7.66 (d,  $J = 8.3$  Hz, 2H), 7.35 (d,  $J = 8.1$  Hz, 2H), 7.31 – 7.26 (m, 4H), 7.26 – 7.22 (m, 2H), 7.14 – 7.08 (m, 4H), 5.38 (ddt,  $J = 17.2, 10.2, 7.0$  Hz, 1H), 5.14 – 4.95 (m, 2H), 4.13 (s, 2H), 3.07 (d,  $J = 7.0$  Hz, 2H), 2.46 (s, 3H).  $^{13}\text{C}$  NMR (100 MHz,  $\text{CDCl}_3$ )  $\delta$  146.46, 143.99, 133.24, 132.79, 130.45, 128.43, 128.29, 128.20, 127.20, 119.91, 109.03, 56.65, 50.30, 40.82, 21.91. HRMS (ESI)  $m/z$ :  $[\text{M} + \text{H}]^+$  Calcd for  $\text{C}_{25}\text{H}_{25}\text{N}_2\text{O}_2\text{S}$  417.1631; Found 417.1639.

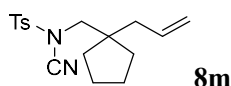

Purified by column chromatography (silica gel, EtOAc/Petroleum ether: 1/5) to afford the title compound (95% yield, 303 mg) as white solid, mp: 58 - 59 °C.  $^1\text{H}$  NMR (400 MHz,  $\text{CDCl}_3$ )  $\delta$  7.82 (d,  $J = 8.4$  Hz, 2H), 7.41 (d,  $J = 8.1$  Hz, 2H), 5.74 (ddt,  $J = 14.8, 10.6, 7.4$  Hz, 1H), 5.13 – 5.03 (m, 2H), 3.25 (s, 2H), 2.47 (s, 3H), 2.20 (d,  $J = 7.4$  Hz, 2H), 1.66 – 1.59 (m, 4H), 1.55 – 1.47 (m, 4H).  $^{13}\text{C}$  NMR (125 MHz,  $\text{CDCl}_3$ )  $\delta$  146.49, 133.83, 133.61, 130.51, 128.01, 118.93, 110.49, 57.15, 46.80, 41.03, 35.05, 24.50, 21.85. HRMS (ESI)  $m/z$ :  $[\text{M} + \text{H}]^+$  Calcd for  $\text{C}_{17}\text{H}_{23}\text{N}_2\text{O}_2\text{S}$  319.1475; Found 319.1484.

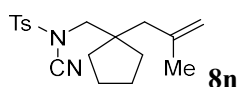

Purified by column chromatography (silica gel, EtOAc/Petroleum ether: 1/5) to afford the title compound (93% yield, 309 mg) as white solid, mp: 59 - 60 °C. <sup>1</sup>H NMR (500 MHz, CDCl<sub>3</sub>) δ 7.82 (d, *J* = 8.3 Hz, 2H), 7.41 (d, *J* = 8.3 Hz, 2H), 4.86 (s, 1H), 4.71 (s, 1H), 3.32 (s, 2H), 2.48 (s, 3H), 2.21 (s, 2H), 1.75 (s, 3H), 1.67 – 1.57 (m, 8H). <sup>13</sup>C NMR (125 MHz, CDCl<sub>3</sub>) δ 146.48, 142.20, 133.64, 130.51, 128.05, 115.43, 110.59, 57.10, 46.76, 44.87, 35.60, 25.07, 24.42, 21.88. HRMS (ESI) *m/z*: [M + H]<sup>+</sup> Calcd for C<sub>18</sub>H<sub>25</sub>N<sub>2</sub>O<sub>2</sub>S 333.1631; Found 333.1632.

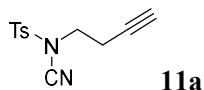

Purified by column chromatography (silica gel, EtOAc/Petroleum ether: 1/5) to afford the title compound (80% yield, 199 mg) as white solid, mp: 80 - 81 °C. <sup>1</sup>H NMR (400 MHz, CDCl<sub>3</sub>) δ 7.85 (d, *J* = 7.8 Hz, 2H), 7.42 (d, *J* = 8.2 Hz, 2H), 3.56 (t, *J* = 7.2 Hz, 2H), 2.56 (td, *J* = 7.2 Hz, 2.6 Hz, 2H), 2.49 (s, 3H), 2.00 (t, *J* = 2.6 Hz, 1H). <sup>13</sup>C NMR (125 MHz, CDCl<sub>3</sub>) δ 146.79, 133.74, 130.64, 128.05, 108.36, 78.12, 71.86, 48.82, 21.91, 18.79. HRMS (ESI) *m/z*: [M + H]<sup>+</sup> Calcd for C<sub>12</sub>H<sub>13</sub>N<sub>2</sub>O<sub>2</sub>S 249.0692; Found 249.0678.

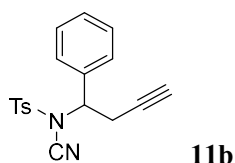

Purified by column chromatography (silica gel, EtOAc/Petroleum ether: 1/3) to afford the title compound (71% yield, 230 mg) as white solid, mp: 75 - 76 °C. <sup>1</sup>H NMR (500 MHz, CDCl<sub>3</sub>) δ 7.68 (d, *J* = 8.4 Hz, 2H), 7.34 – 7.15 (m, 7H), 5.03 (dd, *J* = 8.5, 7.0 Hz, 1H), 2.94 – 2.79 (m, 2H), 2.42 (s, 3H), 1.89 (t, *J* = 2.6 Hz, 1H). <sup>13</sup>C NMR (125 MHz, CDCl<sub>3</sub>) δ 146.27, 135.92, 134.21, 130.13, 129.41, 129.08, 128.15, 126.90, 107.29, 77.99, 72.15, 62.56, 24.56, 21.82. HRMS (ESI) *m/z*: [M + H]<sup>+</sup> Calcd for C<sub>18</sub>H<sub>17</sub>N<sub>2</sub>O<sub>2</sub>S 325.1005; Found 325.1000.

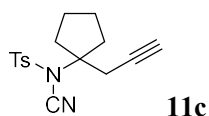

Purified by column chromatography (silica gel, EtOAc/Petroleum ether: 1/6) to afford the title compound (an inseparable mixture, 80% yield, 181 mg, dr = 2.6:1) as colorless oil. The major isomer: <sup>1</sup>H NMR (500 MHz, CDCl<sub>3</sub>) δ 7.87 (d, *J* = 8.4 Hz, 2H), 7.38 (d, *J* = 8.2 Hz, 2H), 2.81 (d, *J* = 2.5 Hz, 2H), 2.46 (s, 3H), 2.30 – 2.20 (m, 2H), 2.02 – 1.95 (m, 2H), 1.99 (t, *J* = 2.7 Hz, 1H), 1.69 – 1.63 (m, 2H), 1.61 – 1.53 (m, 2H). The minor isomer: <sup>1</sup>H NMR (500 MHz, CDCl<sub>3</sub>) δ 7.82 (d, *J* = 8.4 Hz, 2H), 7.32 (d, *J* = 8.4 Hz, 2H), 2.54 (d, *J* = 2.5 Hz, 2H), 2.43 (s, 2H), 2.04 (t, *J* = 2.7 Hz, 1H), 1.94 – 1.88 (m, 2H), 1.86 – 1.78 (m, 4H), 1.78 – 1.72 (m, 2H). <sup>13</sup>C NMR (125 MHz, CDCl<sub>3</sub>) δ 146.18, 144.31, 135.72, 130.22, 129.74, 128.10, 126.88, 108.75, 78.99, 78.76, 75.93, 72.05, 71.94, 71.40, 39.54, 37.13, 30.35, 28.37, 23.47, 22.63, 21.86, 21.69. HRMS (ESI) *m/z*: [M + H]<sup>+</sup> Calcd for C<sub>16</sub>H<sub>19</sub>N<sub>2</sub>O<sub>2</sub>S 303.1162; Found 303.1163.

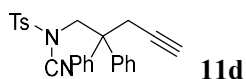

Purified by column chromatography (silica gel, EtOAc/Petroleum ether: 1/3) to afford the title compound (89% yield, 369 mg) as white solid, mp: 173 - 174 °C. <sup>1</sup>H NMR (400 MHz, CDCl<sub>3</sub>) δ 7.74 (d, *J* = 8.3 Hz, 2H), 7.39 (d, *J* = 8.3 Hz, 2H), 7.35 – 7.27 (m, 6H), 7.18 – 7.07 (m, 4H), 4.26 (s, 2H), 3.17 (d, *J* = 2.4 Hz, 2H), 2.49 (s, 3H), 1.95 (t, *J* = 2.3 Hz, 1H). <sup>13</sup>C NMR (125 MHz, CDCl<sub>3</sub>) δ 146.63, 142.86, 133.40, 130.56, 128.53, 128.23, 127.64, 108.67, 80.08, 72.92, 57.24, 50.16, 28.43, 21.94. HRMS (ESI) *m/z*: [M + H]<sup>+</sup> Calcd for C<sub>25</sub>H<sub>23</sub>N<sub>2</sub>O<sub>2</sub>S 415.1475; Found 415.1486.

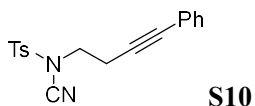

**S10** was prepared according to the literature<sup>8</sup>. Purified by column chromatography (silica gel, EtOAc/Petroleum ether: 1/3) to afford the title compound (81% yield, 263 mg) as yellow solid, mp: 95 - 96 °C. <sup>1</sup>H NMR (500 MHz, CDCl<sub>3</sub>) δ 7.85 (d, *J* = 8.3 Hz, 2H), 7.37 – 7.32 (m, 4H), 7.30 – 7.26 (m, 3H), 3.65 (t, *J* = 7.0 Hz, 2H), 2.78 (t, *J* = 7.0 Hz, 2H), 2.41 (s, 3H). <sup>13</sup>C NMR (125 MHz, CDCl<sub>3</sub>) δ 146.65, 133.81, 131.76, 130.58, 128.35, 122.80, 108.49, 83.66, 83.51, 49.14, 21.84, 19.76. HRMS (ESI) *m/z*: [M + H]<sup>+</sup> Calcd for C<sub>18</sub>H<sub>17</sub>N<sub>2</sub>O<sub>2</sub>S 325.1005; Found 325.1013.

## IV. General Procedure and Experimental Details

### 1. General procedure for preparation of products **3** (or **9**) and **5** (or **10**)

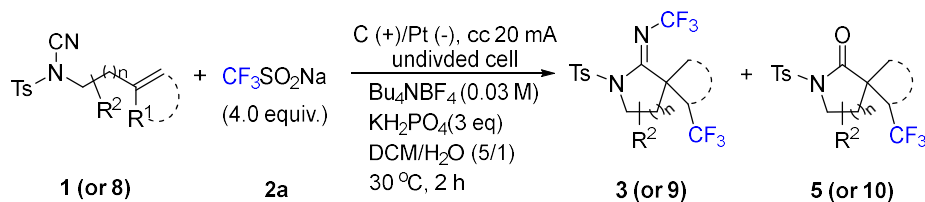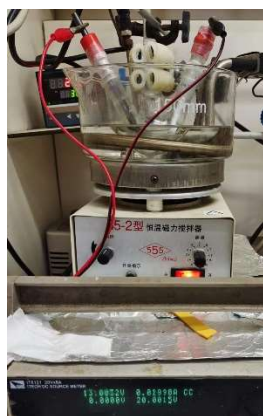

In an undivided three necked-flask (25 mL) equipped with a stir bar, a mixture of alkene **1** (or **8**) (0.3 mmol),  $\text{CF}_3\text{SO}_2\text{Na}$  **2a** (1.2 mmol),  $\text{Bu}_4\text{NBF}_4$  (0.3 mmol),  $\text{KH}_2\text{PO}_4$  (0.9 mmol) and DCM/ $\text{H}_2\text{O}$  (v/v = 5/1, 10 mL) were added. The cell was equipped with graphite rod ( $\Phi$  6 mm) as the anode and platinum plate (1 cm  $\times$  1 cm  $\times$  0.01 cm) as the cathode and connected to a DC regulated power supply. The reaction mixture was stirred and electrolyzed at a constant current of 20 mA at 30 °C for 2 h. Upon completion,  $\text{H}_2\text{O}$  (5 mL) was added, the mixture was extracted with DCM (8 mL  $\times$  3). The combined organic layer was washed with brine, dried over  $\text{Na}_2\text{SO}_4$ , filtered, and concentrated *in vacuo*. The residue was purified by column chromatography (silica gel, EtOAc/Petroleum ether (60-90 °C)) to provide the desired products **3** (or **9**) and **5** (or **10**).

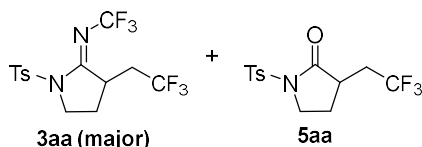

After stirring at 30 °C for 2 hours, the residue was purified by column chromatography (silica gel, EtOAc/Petroleum ether: 1/10) to afford the title compound **3aa** (61% yield, 71 mg) as white solid, mp: 120 - 121 °C.  $^1\text{H}$  NMR (400 MHz,  $\text{CDCl}_3$ )  $\delta$  7.91 (d,  $J$  = 8.3 Hz, 2H), 7.33 (d,  $J$  = 8.1 Hz, 2H), 4.15 – 4.05 (m, 1H), 3.97 – 3.90 (m, 1H), 3.42 – 3.28 (m, 1H), 2.45 (s, 3H), 2.40 – 2.27 (m, 1H), 2.24 – 2.09 (m, 3H).  $^{13}\text{C}$  NMR (125 MHz,  $\text{CDCl}_3$ )  $\delta$  165.80 (q,  $J$  = 6.9 Hz), 145.92, 133.93, 129.54, 129.17, 125.65 (q,  $J$  = 277.5 Hz), 123.28 (q,  $J$  = 257.0 Hz), 46.66, 37.33, 33.84 (q,  $J$  = 29.4 Hz), 25.33, 21.83.  $^{19}\text{F}$  NMR (470 MHz,  $\text{CDCl}_3$ )  $\delta$  -51.74, -64.40 (t,  $J$  = 10.2 Hz). HRMS (ESI)  $m/z$ :  $[\text{M} + \text{H}]^+$  Calcd for  $\text{C}_{14}\text{H}_{15}\text{F}_6\text{N}_2\text{O}_2\text{S}$  389.0753; Found 389.0756.

Compound **5aa** (20% yield, 19 mg) as white solid, mp: 119 - 120 °C.  $^1\text{H}$  NMR (400 MHz,  $\text{CDCl}_3$ )  $\delta$  7.90 (d,  $J$  = 8.2 Hz, 2H), 7.34 (d,  $J$  = 7.7 Hz, 2H), 4.12 – 3.96 (m, 1H), 3.77 – 3.59 (m, 1H), 2.83 – 2.63 (m, 2H), 2.43 – 2.39 (m, 1H), 2.41 (s, 3H), 2.17 – 1.96 (m, 1H), 1.92 – 1.81 (m, 1H).  $^{13}\text{C}$  NMR (125 MHz,  $\text{CDCl}_3$ )  $\delta$  172.44, 145.68, 134.80, 129.90, 128.15, 126.41 (q,  $J$  = 276.7 Hz), 45.42, 38.35, 34.56 (q,  $J$  = 29.6 Hz), 25.91, 21.79.  $^{19}\text{F}$  NMR (470 MHz,  $\text{CDCl}_3$ )  $\delta$  -65.01 (t,  $J$  = 10.7 Hz). HRMS (ESI)  $m/z$ :  $[\text{M} + \text{H}]^+$  Calcd for  $\text{C}_{13}\text{H}_{15}\text{F}_3\text{NO}_3\text{S}$  322.0719; Found 322.0717.

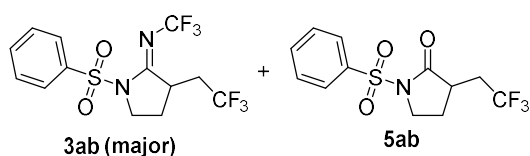

After stirring at 30 °C for 2 hours, the residue was purified by column chromatography (silica gel, EtOAc/Petroleum ether: 1/10) to afford the title compound **3ab** (48% yield, 54 mg) as white solid, mp: 86 - 88 °C. <sup>1</sup>H NMR (300 MHz, CDCl<sub>3</sub>) δ 8.04 (d, *J* = 8.1 Hz, 2H), 7.68 (t, *J* = 7.4 Hz, 1H), 7.55 (t, *J* = 7.8 Hz, 2H), 4.18 – 4.06 (m, 1H), 4.02 – 3.87 (m, 1H), 3.45 – 3.28 (m, 1H), 2.43 – 2.29 (m, 1H), 2.26 – 2.09 (m, 3H). <sup>13</sup>C NMR (125 MHz, CDCl<sub>3</sub>) δ 165.81 (q, *J* = 7.1 Hz), 136.98, 134.65, 129.13, 128.92, 125.64 (q, *J* = 277.3 Hz), 123.22 (q, *J* = 257.1 Hz), 46.69, 37.33, 33.88 (q, *J* = 29.2 Hz), 25.35. <sup>19</sup>F NMR (470 MHz, CDCl<sub>3</sub>) δ -51.93, -64.38 (t, *J* = 10.2 Hz). HRMS (ESI) *m/z*: [M + H]<sup>+</sup> Calcd for C<sub>13</sub>H<sub>13</sub>F<sub>6</sub>N<sub>2</sub>O<sub>2</sub>S 375.0596; Found 375.0605.

Compound **5ab** (18% yield, 17 mg) as colorless oil. <sup>1</sup>H NMR (400 MHz, CDCl<sub>3</sub>) δ 8.05 (d, *J* = 7.3 Hz, 2H), 7.68 (t, *J* = 7.5 Hz, 1H), 7.56 (t, *J* = 7.8 Hz, 2H), 4.16 – 3.95 (m, 1H), 3.76 – 3.61 (m, 1H), 2.83 – 2.64 (m, 2H), 2.52 – 2.37 (m, 1H), 2.13 – 1.97 (m, 1H), 1.95 – 1.82 (m, 1H). <sup>13</sup>C NMR (125 MHz, CDCl<sub>3</sub>) δ 172.48, 137.84, 134.51, 129.35, 128.18, 126.41 (q, *J* = 276.2 Hz), 45.49, 38.40, 34.62 (q, *J* = 29.6 Hz), 25.98. <sup>19</sup>F NMR (470 MHz, CDCl<sub>3</sub>) δ -65.00 (t, *J* = 10.7 Hz). HRMS (ESI) *m/z*: [M + H]<sup>+</sup> Calcd for C<sub>12</sub>H<sub>13</sub>F<sub>3</sub>NO<sub>3</sub>S 308.0563; Found 308.0572.

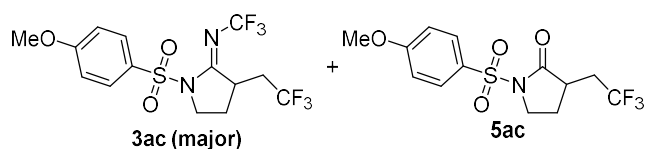

After stirring at 30 °C for 2 hours, the residue was purified by column chromatography (silica gel, EtOAc/Petroleum ether: 1/10) to afford the title compound **3ac** (47% yield, 57 mg) as white solid, mp: 115 - 117 °C. <sup>1</sup>H NMR (400 MHz, CDCl<sub>3</sub>) δ 7.97 (d, *J* = 9.0 Hz, 2H), 6.99 (d, *J* = 9.0 Hz, 2H), 4.13 – 4.05 (m, 1H), 3.97 – 3.90 (m, 1H), 3.88 (s, 3H), 3.40 – 3.32 (m, 1H), 2.42 – 2.28 (m, 1H), 2.27 – 2.07 (m, 3H). <sup>13</sup>C NMR (125 MHz, CDCl<sub>3</sub>) δ 165.75 (q, *J* = 6.4 Hz), 164.54, 131.57, 128.21, 125.67 (q, *J* = 277.8 Hz), 123.32 (q, *J* = 256.7 Hz), 114.05, 55.86, 46.63, 37.35, 33.89 (q, *J* = 29.2 Hz), 25.31. <sup>19</sup>F NMR (470 MHz, CDCl<sub>3</sub>) δ -51.63, -64.38 (t, *J* = 10.2 Hz). HRMS (ESI) *m/z*: [M + H]<sup>+</sup> Calcd for C<sub>14</sub>H<sub>15</sub>F<sub>6</sub>N<sub>2</sub>O<sub>3</sub>S 405.0702; Found 405.0710.

Compound **5ac** (27% yield, 27 mg) as white solid, mp: 120 - 122 °C. <sup>1</sup>H NMR (400 MHz, CDCl<sub>3</sub>) δ 7.97 (d, *J* = 9.0 Hz, 2H), 7.00 (d, *J* = 9.0 Hz, 2H), 4.11 – 3.98 (m, 1H), 3.87 (s, 3H), 3.75 – 3.57 (m, 1H), 2.82 – 2.65 (m, 2H), 2.52 – 2.36 (m, 1H), 2.11 – 1.95 (m, 1H), 1.94 – 1.78 (m, 1H). <sup>13</sup>C NMR (125 MHz, CDCl<sub>3</sub>) δ 172.46, 164.39, 130.55, 129.19, 126.44 (q, *J* = 276.6 Hz), 114.46, 55.87, 45.42, 38.39, 34.65 (q, *J* = 29.5 Hz), 25.96. <sup>19</sup>F NMR (470 MHz, CDCl<sub>3</sub>) δ -65.01 (t, *J* = 10.8 Hz). HRMS (ESI) *m/z*: [M + H]<sup>+</sup> Calcd for C<sub>13</sub>H<sub>15</sub>F<sub>3</sub>NO<sub>4</sub>S 338.0668; Found 338.0670.

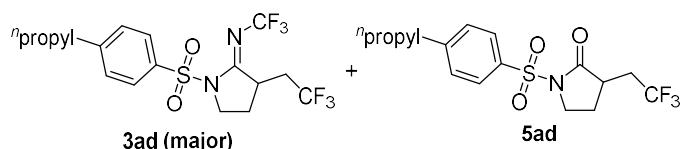

After stirring at 30 °C for 2 hours, the residue was purified by column chromatography (silica gel, EtOAc/Petroleum ether: 1/10) to afford the title compound **3ad** (54% yield, 67 mg) as colorless oil. <sup>1</sup>H NMR (400 MHz, CDCl<sub>3</sub>) δ 7.93 (d, *J* = 8.3 Hz, 2H), 7.34 (d, *J* = 8.3 Hz, 2H), 4.18 – 4.06 (m, 1H), 4.00 – 3.88 (m, 1H), 3.43 – 3.29 (m, 1H), 2.73 – 2.61 (m, 2H), 2.40 – 2.27 (m, 1H), 2.25 – 2.07 (m, 3H), 1.75 – 1.59 (m, 2H), 0.93 (t, *J* = 7.3 Hz, 3H). <sup>13</sup>C NMR (125 MHz, CDCl<sub>3</sub>) δ 165.79 (q, *J* = 6.9 Hz), 150.49, 134.13, 129.18, 128.95, 125.66 (q, *J* = 277.5 Hz), 123.28 (q, *J* =



256.9 Hz), 46.65, 38.08, 37.34, 33.86 (q,  $J = 29.5$  Hz), 25.32, 24.17, 13.71.  $^{19}\text{F}$  NMR (470 MHz,  $\text{CDCl}_3$ )  $\delta$  -51.79, -64.40 (t,  $J = 10.2$  Hz). HRMS (ESI)  $m/z$ :  $[\text{M} + \text{H}]^+$  Calcd for  $\text{C}_{16}\text{H}_{19}\text{F}_6\text{N}_2\text{O}_2\text{S}$  417.1066; Found 417.1071.

Compound **5ad** (16% yield, 17 mg) as white solid, mp: 78 - 79 °C.  $^1\text{H}$  NMR (400 MHz,  $\text{CDCl}_3$ )  $\delta$  7.93 (d,  $J = 8.4$  Hz, 2H), 7.35 (d,  $J = 8.4$  Hz, 2H), 4.08 – 3.99 (m, 1H), 3.75 – 3.64 (m, 1H), 2.83 – 2.70 (m, 2H), 2.69 – 2.64 (m, 2H), 2.51 – 2.37 (m, 1H), 2.11 – 1.96 (m, 1H), 1.94 – 1.82 (m, 1H), 1.72 – 1.61 (m, 2H), 0.95 (t,  $J = 7.3$  Hz, 3H).  $^{13}\text{C}$  NMR (125 MHz,  $\text{CDCl}_3$ )  $\delta$  172.46, 150.30, 135.03, 129.36, 128.22, 126.44 (q,  $J = 276.4$  Hz), 45.46, 38.42, 38.13, 34.66 (q,  $J = 29.5$  Hz), 25.98, 24.23, 13.89.  $^{19}\text{F}$  NMR (470 MHz,  $\text{CDCl}_3$ )  $\delta$  -65.00 (t,  $J = 10.8$  Hz). HRMS (ESI)  $m/z$ :  $[\text{M} + \text{H}]^+$  Calcd for  $\text{C}_{15}\text{H}_{19}\text{F}_3\text{NO}_3\text{S}$  350.1032; Found 350.1037.

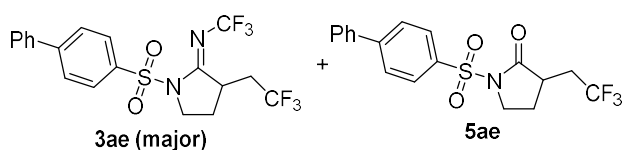

After stirring at 30 °C for 2 hours, the residue was purified by column chromatography (silica gel, DCM/Petroleum ether: 1/1) to afford the title compound **3ae** (70% yield, 94 mg) as colorless oil.  $^1\text{H}$  NMR (500 MHz,  $\text{CDCl}_3$ )  $\delta$  8.11 (d,  $J = 8.5$  Hz, 2H), 7.76 (d,  $J = 8.5$  Hz, 2H), 7.63 (d,  $J = 7.2$  Hz, 2H), 7.49 (t,  $J = 7.4$  Hz, 2H), 7.44 (t,  $J = 7.3$  Hz, 1H), 4.20 – 4.07 (m, 1H), 4.04 – 3.94 (m, 1H), 3.46 – 3.19 (m, 1H), 2.48 – 2.33 (m, 1H), 2.31 – 2.11 (m, 3H).  $^{13}\text{C}$  NMR (125 MHz,  $\text{CDCl}_3$ )  $\delta$  165.83 (q,  $J = 6.9$  Hz), 147.58, 139.05, 135.43, 129.76, 129.26, 128.99, 127.56, 127.47, 125.67 (q,  $J = 277.6$  Hz), 123.29 (q,  $J = 257.1$  Hz), 46.71, 37.37, 33.98 (q,  $J = 29.6$  Hz), 25.41.  $^{19}\text{F}$  NMR (470 MHz,  $\text{CDCl}_3$ )  $\delta$  -51.76, -64.33 (t,  $J = 10.1$  Hz). HRMS (ESI)  $m/z$ :  $[\text{M} + \text{H}]^+$  Calcd for  $\text{C}_{19}\text{H}_{17}\text{F}_6\text{N}_2\text{O}_2\text{S}$  451.0909; Found 451.0914.

Compound **5ae** (15% yield, 16 mg) as white solid, mp: 154 - 156 °C.  $^1\text{H}$  NMR (500 MHz,  $\text{CDCl}_3$ )  $\delta$  8.10 (d,  $J = 8.5$  Hz, 2H), 7.75 (d,  $J = 8.5$  Hz, 2H), 7.60 (d,  $J = 7.2$  Hz, 2H), 7.49 (t,  $J = 7.4$  Hz, 2H), 7.43 (t,  $J = 7.3$  Hz, 1H), 4.13 – 4.04 (m, 1H), 3.78 – 3.69 (m, 1H), 2.85 – 2.69 (m, 2H), 2.55 – 2.41 (m, 1H), 2.14 – 1.99 (m, 1H), 1.97 – 1.86 (m, 1H).  $^{13}\text{C}$  NMR (125 MHz,  $\text{CDCl}_3$ )  $\delta$  172.52, 147.49, 139.12, 136.30, 129.27, 128.95, 128.76, 127.93, 127.54, 126.44 (q,  $J = 276.3$  Hz), 45.52, 38.44, 34.67 (q,  $J = 29.6$  Hz), 26.03.  $^{19}\text{F}$  NMR (470 MHz,  $\text{CDCl}_3$ )  $\delta$  -64.98 (t,  $J = 10.6$  Hz). HRMS (ESI)  $m/z$ :  $[\text{M} + \text{H}]^+$  Calcd for  $\text{C}_{18}\text{H}_{17}\text{F}_3\text{NO}_3\text{S}$  384.0876; Found 384.0872.

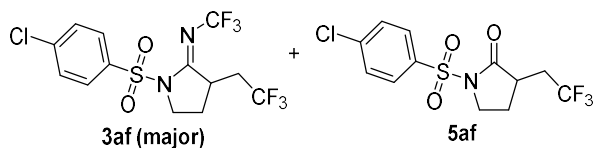

After stirring at 30 °C for 2 hours, the residue was purified by column chromatography (silica gel, DCM/Petroleum ether: 1/1) to afford the title compound **3af** (51% yield, 63 mg) as white solid, mp: 139 - 142 °C.  $^1\text{H}$  NMR (500 MHz,  $\text{CDCl}_3$ )  $\delta$  7.98 (d,  $J = 8.6$  Hz, 2H), 7.52 (d,  $J = 8.6$  Hz, 2H), 4.12 – 4.05 (m, 1H), 4.00 – 3.91 (m, 1H), 3.41 – 3.32 (m, 1H), 2.44 – 2.32 (m, 1H), 2.30 – 2.14 (m, 3H).  $^{13}\text{C}$  NMR (125 MHz,  $\text{CDCl}_3$ )  $\delta$  165.84 (q,  $J = 6.8$  Hz), 141.48, 135.38, 130.70, 129.26, 125.62 (q,  $J = 277.7$  Hz), 123.14 (q,  $J = 257.3$  Hz), 46.72, 37.31, 34.00 (q,  $J = 29.4$  Hz), 25.39.  $^{19}\text{F}$  NMR (470 MHz,  $\text{CDCl}_3$ )  $\delta$  -52.01, -64.34 (t,  $J = 10.1$  Hz). HRMS (ESI)  $m/z$ :  $[\text{M} + \text{H}]^+$  Calcd for  $\text{C}_{13}\text{H}_{12}\text{ClF}_6\text{N}_2\text{O}_2\text{S}$  409.0207; Found 409.0216.

Compound **5af** (16% yield, 16 mg) as white solid, mp: 128 - 129 °C. <sup>1</sup>H NMR (400 MHz, CDCl<sub>3</sub>) δ 7.99 (d, *J* = 8.5 Hz, 2H), 7.53 (d, *J* = 8.5 Hz, 2H), 4.08 – 3.94 (m, 1H), 3.75 – 3.65 (m, 1H), 2.83 – 2.66 (m, 2H), 2.51 – 2.41 (m, 1H), 2.14 – 1.99 (m, 1H), 1.96 – 1.79 (m, 1H). <sup>13</sup>C NMR (125 MHz, CDCl<sub>3</sub>) δ 172.52, 141.35, 136.18, 129.72, 129.68, 126.35 (q, *J* = 276.4 Hz), 45.51, 38.37, 34.59 (q, *J* = 29.7 Hz), 26.00. <sup>19</sup>F NMR (470 MHz, CDCl<sub>3</sub>) δ -64.99 (t, *J* = 10.8 Hz). HRMS (ESI) *m/z*: [M + H]<sup>+</sup> Calcd for C<sub>12</sub>H<sub>12</sub>ClF<sub>3</sub>NO<sub>3</sub>S 342.0173; Found 342.0179.

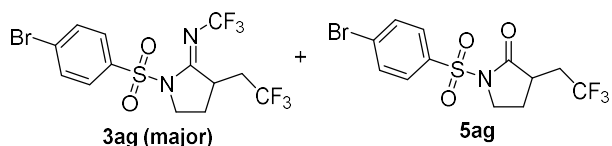

After stirring at 30 °C for 2 hours, the residue was purified by column chromatography (silica gel, DCM/Petroleum ether: 1/1) to afford the title compound **3ag** (58% yield, 79 mg) as white solid, mp: 143 - 145 °C. <sup>1</sup>H NMR (500 MHz, CDCl<sub>3</sub>) δ 7.90 (d, *J* = 8.6 Hz, 2H), 7.69 (d, *J* = 8.6 Hz, 2H), 4.13 – 4.05 (m, 1H), 4.01 – 3.90 (m, 1H), 3.40 – 3.31 (m, 1H), 2.47 – 2.32 (m, 1H), 2.31 – 2.13 (m, 3H). <sup>13</sup>C NMR (125 MHz, CDCl<sub>3</sub>) δ 165.83 (q, *J* = 6.8 Hz), 135.93, 132.27, 130.72, 130.14, 125.62 (q, *J* = 277.6 Hz), 123.13 (q, *J* = 257.2 Hz), 46.72, 37.31, 34.01 (q, *J* = 29.5 Hz), 25.40. <sup>19</sup>F NMR (470 MHz, CDCl<sub>3</sub>) δ -52.01, -64.33 (t, *J* = 10.2 Hz). HRMS (ESI) *m/z*: [M + H]<sup>+</sup> Calcd for C<sub>13</sub>H<sub>12</sub>BrF<sub>6</sub>N<sub>2</sub>O<sub>2</sub>S 452.9702; Found 452.9707.

Compound **5ag** (20% yield, 23 mg) as white solid, mp: 141 - 142 °C. <sup>1</sup>H NMR (400 MHz, CDCl<sub>3</sub>) δ 7.90 (d, *J* = 8.7 Hz, 2H), 7.70 (d, *J* = 8.7 Hz, 2H), 4.06 – 3.97 (m, 1H), 3.78 – 3.63 (m, 1H), 2.84 – 2.65 (m, 2H), 2.50 – 2.41 (m, 1H), 2.13 – 1.98 (m, 1H), 1.97 – 1.83 (m, 1H). <sup>13</sup>C NMR (125 MHz, CDCl<sub>3</sub>) δ 172.52, 136.71, 132.67, 129.97, 129.73, 126.35 (q, *J* = 277.0 Hz), 45.50, 38.35, 34.57 (q, *J* = 29.7 Hz), 25.98. <sup>19</sup>F NMR (470 MHz, CDCl<sub>3</sub>) δ -64.98 (t, *J* = 10.8 Hz). HRMS (ESI) *m/z*: [M + H]<sup>+</sup> Calcd for C<sub>12</sub>H<sub>12</sub>BrF<sub>3</sub>NO<sub>3</sub>S 385.9668; Found 385.9664.

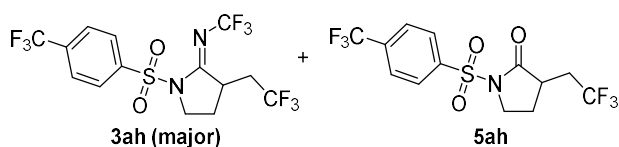

After stirring at 30 °C for 2 hours, the residue was purified by column chromatography (silica gel, DCM/Petroleum ether: 1/2) to afford the title compound **3ah** (62% yield, 82 mg) as white solid, mp: 76 - 77 °C. <sup>1</sup>H NMR (500 MHz, CDCl<sub>3</sub>) δ 8.18 (d, *J* = 8.3 Hz, 2H), 7.82 (d, *J* = 8.3 Hz, 2H), 4.19 – 4.08 (m, 1H), 4.03 – 3.94 (m, 1H), 3.43 – 3.34 (m, 1H), 2.46 – 2.33 (m, 1H), 2.32 – 2.16 (m, 3H). <sup>13</sup>C NMR (125 MHz, CDCl<sub>3</sub>) δ 165.95 (q, *J* = 6.9 Hz), 140.47, 136.13 (q, *J* = 33.0 Hz), 129.86, 124.07, 125.60 (q, *J* = 277.9 Hz), 123.16 (q, *J* = 273.3 Hz), 123.05 (q, *J* = 257.4 Hz), 46.79, 37.31, 34.04 (q, *J* = 29.6 Hz), 25.44. <sup>19</sup>F NMR (470 MHz, CDCl<sub>3</sub>) δ -52.30, -63.38, -64.41 (t, *J* = 10.1 Hz). HRMS (ESI) *m/z*: [M + H]<sup>+</sup> Calcd for C<sub>14</sub>H<sub>12</sub>F<sub>9</sub>N<sub>2</sub>O<sub>2</sub>S 443.0470; Found 443.0479.

Compound **5ah** (20% yield, 23 mg) as white solid, mp: 115 - 117 °C. <sup>1</sup>H NMR (400 MHz, CDCl<sub>3</sub>) δ 8.18 (d, *J* = 8.3 Hz, 2H), 7.83 (d, *J* = 8.4 Hz, 2H), 4.11 – 4.02 (m, 1H), 3.80 – 3.69 (m, 1H), 2.93 – 2.60 (m, 2H), 2.53 – 2.43 (m, 1H), 2.14 – 2.00 (m, 1H), 1.98 – 1.85 (m, 1H). <sup>13</sup>C NMR (125 MHz, CDCl<sub>3</sub>) δ 172.58, 141.21, 136.05 (q, *J* = 32.8 Hz), 128.88, 126.50, 126.32 (q, *J* = 276.6 Hz), 123.14 (q, *J* = 273.3 Hz), 45.58, 38.36, 34.55 (q, *J* = 29.8 Hz), 26.01. <sup>19</sup>F NMR (470 MHz, CDCl<sub>3</sub>) δ -63.33, -65.00 (t, *J* = 10.7 Hz). HRMS (ESI) *m/z*: [M + H]<sup>+</sup> Calcd for C<sub>13</sub>H<sub>12</sub>F<sub>6</sub>NO<sub>3</sub>S 376.0437; Found 376.0444.

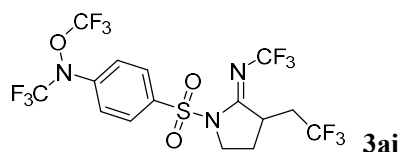

After stirring at 30 °C for 2 hours, the residue was purified by column chromatography (silica gel, DCM/Petroleum ether: 1/1) to afford the title compound (13% yield, 21 mg) as white solid, mp: 65 - 66 °C. <sup>1</sup>H NMR (400 MHz, CDCl<sub>3</sub>) δ 8.15 (d, *J* = 8.8 Hz, 2H), 7.63 (d, *J* = 8.5 Hz, 2H), 4.20 – 4.07 (m, 1H), 4.04 – 3.93 (m, 1H), 3.47 – 3.36 (m, 1H), 2.47 – 2.33 (m, 1H), 2.32 – 2.14 (m, 3H). <sup>13</sup>C NMR (125 MHz, CDCl<sub>3</sub>) δ 165.79 (q, *J* = 6.3 Hz), 144.83, 138.05, 130.64, 125.59 (q, *J* = 277.2 Hz), 124.69, 123.04 (q, *J* = 256.8 Hz), 122.41 (q, *J* = 264.9 Hz), 121.32 (q, *J* = 267.8 Hz), 46.76, 37.29, 34.10 (q, *J* = 29.6 Hz), 25.40. <sup>19</sup>F NMR (470 MHz, CDCl<sub>3</sub>) δ -52.35, -64.37 (t, *J* = 10.1 Hz), -65.45, -70.42. HRMS (ESI) *m/z*: [M + H]<sup>+</sup> Calcd for C<sub>15</sub>H<sub>12</sub>F<sub>12</sub>N<sub>3</sub>O<sub>3</sub>S 542.0402; Found 542.0414.

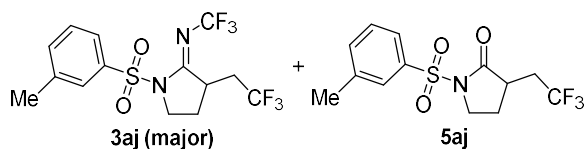

After stirring at 30 °C for 2 hours, the residue was purified by column chromatography (silica gel, EtOAc/Petroleum ether: 1/10) to afford the title compound **3aj** (55% yield, 64 mg) as white solid, mp: 59 - 60 °C. <sup>1</sup>H NMR (500 MHz, CDCl<sub>3</sub>) δ 7.88 (s, 1H), 7.82 (d, *J* = 7.8 Hz, 1H), 7.48 (d, *J* = 7.6 Hz, 1H), 7.42 (t, *J* = 7.7 Hz, 1H), 4.14 – 4.06 (m, 1H), 4.00 – 3.91 (m, 1H), 3.39 – 3.32 (m, 1H), 2.44 (s, 3H), 2.40 – 2.29 (m, 1H), 2.27 – 2.10 (m, 3H). <sup>13</sup>C NMR (125 MHz, CDCl<sub>3</sub>) δ 165.73 (q, *J* = 6.3 Hz), 139.25, 136.72, 135.43, 129.78, 128.80, 126.02, 125.66 (q, *J* = 277.4 Hz), 123.27 (q, *J* = 257.1 Hz), 46.66, 37.34, 33.91 (q, *J* = 29.4 Hz), 25.34, 21.33. <sup>19</sup>F NMR (470 MHz, CDCl<sub>3</sub>) δ -51.87, -64.38 (t, *J* = 10.2 Hz). HRMS (ESI) *m/z*: [M + H]<sup>+</sup> Calcd for C<sub>14</sub>H<sub>15</sub>F<sub>6</sub>N<sub>2</sub>O<sub>2</sub>S 389.0753; Found 389.0746.

Compound **5aj** (17% yield, 16 mg) as white solid, mp: 76 - 77 °C. <sup>1</sup>H NMR (400 MHz, CDCl<sub>3</sub>) δ 7.85 – 7.80 (m, 2H), 7.50 – 7.38 (m, 2H), 4.08 – 4.00 (m, 1H), 3.75 – 3.64 (m, 1H), 2.84 – 2.68 (m, 2H), 2.49 – 2.40 (m, 1H), 2.45 (s, 3H), 2.12 – 1.96 (m, 1H), 1.95 – 1.82 (m, 1H). <sup>13</sup>C NMR (125 MHz, CDCl<sub>3</sub>) δ 172.29, 139.56, 137.55, 135.20, 129.06, 128.25, 126.29 (q, *J* = 277.8 Hz), 125.16, 77.28, 45.36, 38.29, 34.52 (q, *J* = 29.9 Hz), 25.85, 21.38. <sup>19</sup>F NMR (470 MHz, CDCl<sub>3</sub>) δ -65.00 (t, *J* = 10.8 Hz). HRMS (ESI) *m/z*: [M + H]<sup>+</sup> Calcd for C<sub>13</sub>H<sub>15</sub>F<sub>3</sub>NO<sub>3</sub>S 322.0719; Found 322.0729.

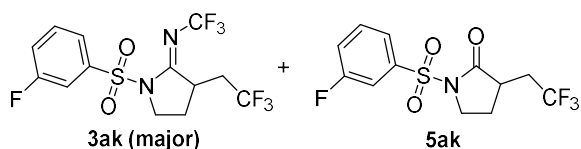

After stirring at 30 °C for 2 hours, the residue was purified by column chromatography (silica gel, EtOAc/Petroleum ether: 1/10) to afford the title compound **3ak** (57% yield, 67 mg) as white solid, mp: 76 - 77 °C. <sup>1</sup>H NMR (500 MHz, CDCl<sub>3</sub>) δ 7.85 (d, *J* = 7.9 Hz, 1H), 7.75 (dt, *J* = 8.0, 2.0 Hz, 1H), 7.55 (td, *J* = 8.1, 5.3 Hz, 1H), 7.39 (td, *J* = 8.2, 2.4 Hz, 1H), 4.14 – 4.07 (m, 1H), 4.00 – 3.91 (m, 1H), 3.43 – 3.35 (m, 1H), 2.45 – 2.33 (m, 1H), 2.30 – 2.14 (m, 3H). <sup>13</sup>C NMR (125 MHz, CDCl<sub>3</sub>) δ 165.84 (q, *J* = 6.8 Hz), 162.12 (d, *J* = 252.0 Hz), 138.82 (d, *J* = 7.2 Hz), 130.72 (d, *J*

= 7.7 Hz), 125.61 (q,  $J = 277.5$  Hz), 124.99, 123.12 (q,  $J = 257.3$  Hz), 121.94 (d,  $J = 21.4$  Hz), 116.56 (d,  $J = 25.0$  Hz), 46.77, 37.31, 33.99 (q,  $J = 29.5$  Hz), 25.40.  $^{19}\text{F}$  NMR (470 MHz,  $\text{CDCl}_3$ )  $\delta$  -52.18, -64.37 (t,  $J = 10.2$  Hz), -109.50 (td,  $J = 8.0, 5.7$  Hz). HRMS (ESI)  $m/z$ :  $[\text{M} + \text{H}]^+$  Calcd for  $\text{C}_{13}\text{H}_{12}\text{F}_7\text{N}_2\text{O}_2\text{S}$  393.0502; Found 393.0511.

Compound **5ak** (7% yield, 7 mg) as colorless oil.  $^1\text{H}$  NMR (400 MHz,  $\text{CDCl}_3$ )  $\delta$  7.86 (d,  $J = 7.9$  Hz, 1H), 7.75 (dt,  $J = 7.9, 1.9$  Hz, 1H), 7.62 – 7.51 (m, 1H), 7.38 (td,  $J = 8.3, 2.4$  Hz, 1H), 4.10 – 3.99 (m, 1H), 3.78 – 3.64 (m, 1H), 2.84 – 2.68 (m, 2H), 2.52 – 2.42 (m, 1H), 2.14 – 1.98 (m, 1H), 1.97 – 1.84 (m, 1H).  $^{13}\text{C}$  NMR (125 MHz,  $\text{CDCl}_3$ )  $\delta$  172.49, 163.39, 161.39, 131.18 (d,  $J = 7.4$  Hz), 126.36 (q,  $J = 275.6$  Hz), 124.04, 121.85 (d,  $J = 21.2$  Hz), 115.61 (d,  $J = 24.9$  Hz), 45.56, 38.37, 34.59 (q,  $J = 29.8$  Hz), 25.99.  $^{19}\text{F}$  NMR (470 MHz,  $\text{CDCl}_3$ )  $\delta$  -64.98 (t,  $J = 10.8$  Hz), -108.72 (td,  $J = 8.0, 5.6$  Hz). HRMS (ESI)  $m/z$ :  $[\text{M} + \text{H}]^+$  Calcd for  $\text{C}_{12}\text{H}_{12}\text{F}_4\text{NO}_3\text{S}$  326.0469; Found 326.0471.

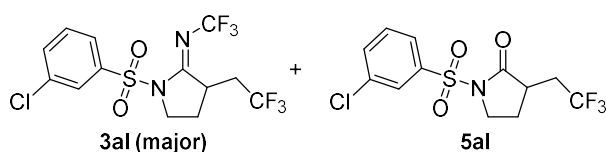

After stirring at 30 °C for 2 hours, the residue was purified by column chromatography (silica gel, EtOAc/Petroleum ether: 1/10) to afford the title compound **3al** (45% yield, 55 mg) as white solid, mp: 64 - 65 °C.  $^1\text{H}$  NMR (500 MHz,  $\text{CDCl}_3$ )  $\delta$  8.05 (s, 1H), 7.97 (d,  $J = 8.0$  Hz, 1H), 7.67 (d,  $J = 7.9$  Hz, 1H), 7.53 (t,  $J = 8.0$  Hz, 1H), 4.17 – 4.08 (m, 1H), 4.04 – 3.94 (m, 1H), 3.45 – 3.35 (m, 1H), 2.49 – 2.34 (m, 1H), 2.33 – 2.13 (m, 3H).  $^{13}\text{C}$  NMR (125 MHz,  $\text{CDCl}_3$ )  $\delta$  165.81 (q,  $J = 6.3$  Hz), 138.52, 135.17, 134.75, 130.16, 129.18, 127.45, 125.61 (q,  $J = 277.5$  Hz), 123.10 (q,  $J = 257.7$  Hz), 46.75, 37.29, 34.03 (q,  $J = 29.8$  Hz), 25.41.  $^{19}\text{F}$  NMR (470 MHz,  $\text{CDCl}_3$ )  $\delta$  -52.18, -64.31 (t,  $J = 10.1$  Hz). HRMS (ESI)  $m/z$ :  $[\text{M} + \text{H}]^+$  Calcd for  $\text{C}_{13}\text{H}_{12}\text{ClF}_6\text{N}_2\text{O}_2\text{S}$  409.0207; Found 409.0214.

Compound **5al** (15% yield, 15 mg) as white solid, mp: 109 - 111 °C.  $^1\text{H}$  NMR (400 MHz,  $\text{CDCl}_3$ )  $\delta$  8.01 (s, 1H), 7.95 (d,  $J = 7.9$  Hz, 1H), 7.64 (d,  $J = 9.0$  Hz, 1H), 7.51 (t,  $J = 8.0$  Hz, 1H), 4.11 – 3.97 (m, 1H), 3.82 – 3.64 (m, 1H), 2.86 – 2.64 (m, 2H), 2.53 – 2.40 (m, 1H), 2.14 – 1.99 (m, 1H), 1.97 – 1.84 (m, 1H).  $^{13}\text{C}$  NMR (125 MHz,  $\text{CDCl}_3$ )  $\delta$  172.49, 139.40, 135.57, 134.66, 130.62, 128.11, 126.48, 126.36 (q,  $J = 276.7$  Hz), 45.57, 38.37, 34.59 (q,  $J = 29.8$  Hz), 26.00.  $^{19}\text{F}$  NMR (470 MHz,  $\text{CDCl}_3$ )  $\delta$  -64.98 (t,  $J = 10.8$  Hz). HRMS (ESI)  $m/z$ :  $[\text{M} + \text{H}]^+$  Calcd for  $\text{C}_{12}\text{H}_{12}\text{ClF}_3\text{NO}_3\text{S}$  342.0173; Found 342.0166.

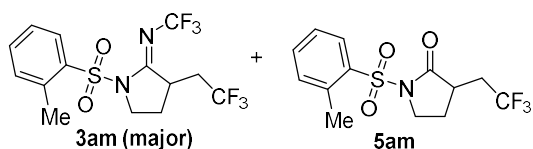

After stirring at 30 °C for 2 hours, the residue was purified by column chromatography (silica gel, EtOAc/Petroleum ether: 1/10) to afford the title compound **3am** (40% yield, 47 mg) as white solid, mp: 134 - 136 °C.  $^1\text{H}$  NMR (500 MHz,  $\text{CDCl}_3$ )  $\delta$  8.09 (d,  $J = 8.0$  Hz, 1H), 7.52 (t,  $J = 7.5$  Hz, 1H), 7.37 (t,  $J = 7.7$  Hz, 1H), 7.30 (d,  $J = 7.6$  Hz, 1H), 4.26 – 4.19 (m, 1H), 4.04 – 3.97 (m, 1H), 3.46 – 3.35 (m, 1H), 2.60 (s, 3H), 2.48 – 2.35 (m, 1H), 2.33 – 2.18 (m, 3H).  $^{13}\text{C}$  NMR (125 MHz,  $\text{CDCl}_3$ )  $\delta$  165.69 (q,  $J = 6.7$  Hz), 138.30, 135.88, 134.36, 132.58, 132.42, 126.29, 125.66 (q,  $J = 277.6$  Hz), 123.06 (q,  $J = 256.9$  Hz), 46.33, 37.39, 33.92 (q,  $J = 29.0$  Hz), 25.62, 20.53.  $^{19}\text{F}$  NMR (470 MHz,  $\text{CDCl}_3$ )  $\delta$  -52.17, -64.36 (t,  $J = 10.2$  Hz). HRMS (ESI)  $m/z$ :  $[\text{M} + \text{H}]^+$  Calcd for  $\text{C}_{14}\text{H}_{13}\text{F}_6\text{N}_2\text{O}_2\text{S}$  389.0753; Found 389.0749.

Compound **5am** (13% yield, 13 mg) as colorless oil.  $^1\text{H}$  NMR (400 MHz,  $\text{CDCl}_3$ )  $\delta$  8.14 (d,  $J = 9.1$  Hz, 1H), 7.53 (t,  $J = 8.1$  Hz, 1H), 7.40 (t,  $J = 7.7$  Hz, 1H), 7.32 (d,  $J = 7.6$  Hz, 1H), 4.17 – 4.01 (m, 1H), 3.93 – 3.76 (m, 1H), 2.91 – 2.65 (m, 2H), 2.62 (s, 3H), 2.57 – 2.43 (m, 1H), 2.09 – 1.99 (m, 1H), 1.99 – 1.87 (m, 1H).  $^{13}\text{C}$  NMR (125 MHz,  $\text{CDCl}_3$ )  $\delta$  172.40, 138.09, 136.31, 134.38, 132.74, 131.52, 126.64, 126.41 (q,  $J = 276.5$  Hz), 45.37, 38.41, 34.56 (q,  $J = 29.5$  Hz), 26.29, 20.58.  $^{19}\text{F}$  NMR (470 MHz,  $\text{CDCl}_3$ )  $\delta$  -64.94 (t,  $J = 10.7$  Hz). HRMS (ESI)  $m/z$ :  $[\text{M} + \text{H}]^+$  Calcd for  $\text{C}_{13}\text{H}_{15}\text{F}_3\text{NO}_3\text{S}$  322.0719; Found 322.0729.

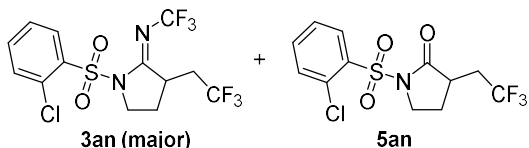

After stirring at 30 °C for 2 hours, the residue was purified by column chromatography (silica gel, EtOAc/Petroleum ether: 1/10) to afford the title compound **3an** (45% yield, 55 mg) as white solid, mp: 158 - 159 °C.  $^1\text{H}$  NMR (500 MHz,  $\text{CDCl}_3$ )  $\delta$  8.27 (d,  $J = 8.0$  Hz, 1H), 7.58 (t,  $J = 8.4$  Hz, 1H), 7.53 – 7.45 (m, 2H), 4.42 – 4.25 (m, 1H), 4.16 – 3.99 (m, 1H), 3.48 – 3.23 (m, 1H), 2.47 – 2.20 (m, 4H).  $^{13}\text{C}$  NMR (125 MHz,  $\text{CDCl}_3$ )  $\delta$  165.78 (q,  $J = 6.6$  Hz), 135.23, 135.03, 131.54, 127.18, 125.64 (q,  $J = 277.5$  Hz), 123.93 (q,  $J = 257.2$  Hz), 46.53, 37.37, 33.97 (q,  $J = 29.7$  Hz), 25.72.  $^{19}\text{F}$  NMR (470 MHz,  $\text{CDCl}_3$ )  $\delta$  -52.49, -64.46 (t,  $J = 9.7$  Hz). HRMS (ESI)  $m/z$ :  $[\text{M} + \text{H}]^+$  Calcd for  $\text{C}_{13}\text{H}_{12}\text{ClF}_6\text{N}_2\text{O}_2\text{S}$  409.0207; Found 409.0216.

Compound **5an** (16% yield, 16 mg) as colorless oil.  $^1\text{H}$  NMR (400 MHz,  $\text{CDCl}_3$ )  $\delta$  8.30 (dd,  $J = 7.9, 1.4$  Hz, 1H), 7.62 – 7.56 (m, 1H), 7.54 – 7.47 (m, 2H), 4.28 – 4.17 (m, 1H), 4.04 – 3.93 (m, 1H), 2.91 – 2.80 (m, 1H), 2.76 – 2.60 (m, 1H), 2.58 – 2.48 (m, 1H), 2.11 – 1.90 (m, 2H).  $^{13}\text{C}$  NMR (125 MHz,  $\text{CDCl}_3$ )  $\delta$  172.52, 135.71, 135.26, 133.73, 132.07, 131.85, 127.52, 126.40 (q,  $J = 283.1$  Hz), 45.74, 38.21, 34.50 (q,  $J = 29.8$  Hz), 26.49.  $^{19}\text{F}$  NMR (470 MHz,  $\text{CDCl}_3$ )  $\delta$  -64.95 (t,  $J = 10.7$  Hz). HRMS (ESI)  $m/z$ :  $[\text{M} + \text{H}]^+$  Calcd for  $\text{C}_{12}\text{H}_{12}\text{ClF}_3\text{NO}_3\text{S}$  342.0173; Found 342.0180.

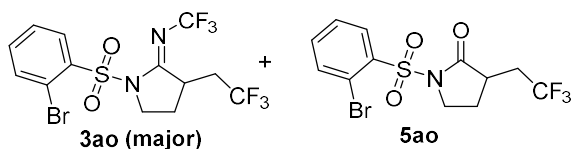

After stirring at 30 °C for 2 hours, the residue was purified by column chromatography (silica gel, DCM/Petroleum ether: 1/1) to afford the title compound **3ao** (60% yield, 81 mg) as white solid, mp: 163 - 164 °C.  $^1\text{H}$  NMR (500 MHz,  $\text{CDCl}_3$ )  $\delta$  8.30 (d,  $J = 7.9$  Hz, 1H), 7.72 (d,  $J = 7.8$  Hz, 1H), 7.53 (t,  $J = 8.2$  Hz, 1H), 7.48 (t,  $J = 7.6$  Hz, 1H), 4.44 – 4.29 (m, 1H), 4.17 – 4.09 (m, 1H), 3.47 – 3.35 (m, 1H), 2.46 – 2.29 (m, 3H), 2.28 – 2.21 (m, 1H).  $^{13}\text{C}$  NMR (125 MHz,  $\text{CDCl}_3$ )  $\delta$  165.72 (q,  $J = 6.9$  Hz), 136.99, 135.56, 135.17, 135.04, 127.70, 122.89 (q,  $J = 257.1$  Hz), 125.65 (q,  $J = 277.4$  Hz), 119.62, 46.71, 37.34, 34.06 (q,  $J = 29.2$  Hz), 25.72.  $^{19}\text{F}$  NMR (470 MHz,  $\text{CDCl}_3$ )  $\delta$  -52.47, -64.42 (t,  $J = 10.1$  Hz). HRMS (ESI)  $m/z$ :  $[\text{M} + \text{H}]^+$  Calcd for  $\text{C}_{13}\text{H}_{12}\text{BrF}_6\text{N}_2\text{O}_2\text{S}$  452.9702; Found 452.9712.

Compound **5ao** (16% yield, 18 mg) as colorless oil.  $^1\text{H}$  NMR (400 MHz,  $\text{CDCl}_3$ )  $\delta$  8.34 (d,  $J = 9.6$  Hz, 1H), 7.74 (d,  $J = 9.0$  Hz, 1H), 7.55 (t,  $J = 8.3$  Hz, 1H), 7.49 (t,  $J = 7.6$  Hz, 1H), 4.34 – 4.22 (m, 1H), 4.07 – 3.97 (m, 1H), 2.93 – 2.81 (m, 1H), 2.78 – 2.62 (m, 1H), 2.60 – 2.50 (m, 1H), 2.11 – 1.94 (m, 2H).  $^{13}\text{C}$  NMR (125 MHz,  $\text{CDCl}_3$ )  $\delta$  172.49, 137.43, 135.36, 135.20, 134.22, 128.07, 126.39 (q,  $J = 276.7$  Hz), 120.14, 45.88, 38.19, 34.53 (q,  $J = 30.0$  Hz), 26.46.  $^{19}\text{F}$  NMR (470 MHz,  $\text{CDCl}_3$ )  $\delta$  -64.95 (t,  $J = 10.7$  Hz). HRMS (ESI)  $m/z$ :  $[\text{M} + \text{H}]^+$  Calcd for  $\text{C}_{12}\text{H}_{12}\text{BrF}_3\text{NO}_3\text{S}$  385.9668; Found 385.9662.

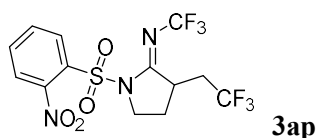

After stirring at 30 °C for 2 hours, the residue was purified by column chromatography (silica gel, EtOAc/Petroleum ether: 1/3) to afford the title compound (14% yield, 18 mg) as white solid, mp: 146 - 147 °C. <sup>1</sup>H NMR (400 MHz, CDCl<sub>3</sub>) δ 8.42 (d, *J* = 7.6 Hz, 1H), 7.86 – 7.74 (m, 3H), 4.29 – 4.16 (m, 1H), 4.10 – 3.98 (m, 1H), 3.50 – 3.39 (m, 1H), 2.51 – 2.34 (m, 3H), 2.32 – 2.22 (m, 1H). <sup>13</sup>C NMR (125 MHz, CDCl<sub>3</sub>) δ 166.17 (q, *J* = 6.8 Hz), 148.32, 136.43, 135.53, 131.79, 130.79, 125.66 (q, *J* = 276.7 Hz), 124.47, 122.96 (q, *J* = 256.9 Hz), 46.59, 37.39, 33.81 (q, *J* = 29.7 Hz), 25.80. <sup>19</sup>F NMR (470 MHz, CDCl<sub>3</sub>) δ -52.33, -64.47 (t, *J* = 10.1 Hz). HRMS (ESI) *m/z*: [M + H]<sup>+</sup> Calcd for C<sub>13</sub>H<sub>12</sub>F<sub>6</sub>N<sub>3</sub>O<sub>4</sub>S 420.0447; Found 420.0451.

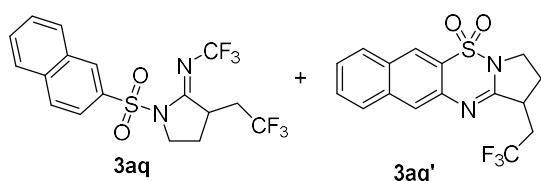

After stirring at 30 °C, 10 mA for 3.5 hours, the residue was purified by column chromatography (silica gel, EtOAc/Petroleum ether: 1/10) to afford the title compound **3aq** (5% yield, 6 mg) as colorless oil. <sup>1</sup>H NMR (400 MHz, CDCl<sub>3</sub>) δ 8.68 (s, 1H), 8.08 – 7.89 (m, 4H), 7.74 – 7.61 (m, 2H), 4.23 – 4.12 (m, 1H), 4.07 – 3.94 (m, 1H), 3.44 – 3.26 (m, 1H), 2.42 – 2.28 (m, 1H), 2.26 – 2.08 (m, 3H). <sup>13</sup>C NMR (125 MHz, CDCl<sub>3</sub>) δ 165.74 (q, *J* = 6.8 Hz), 135.80, 133.63, 132.04, 131.85, 129.87, 129.84, 129.19, 128.08, 127.95, 125.63 (q, *J* = 277.2 Hz), 123.23 (q, *J* = 256.9 Hz), 123.09, 46.79, 37.37, 33.98 (q, *J* = 29.5 Hz), 25.43. <sup>19</sup>F NMR (470 MHz, CDCl<sub>3</sub>) δ -51.88, -64.35 (t, *J* = 10.1 Hz). HRMS (ESI) *m/z*: [M + H]<sup>+</sup> Calcd for C<sub>17</sub>H<sub>15</sub>F<sub>6</sub>N<sub>2</sub>O<sub>2</sub>S 425.0753; Found 425.0763.

Compound **3aq'** (32% yield, 34 mg) as white solid, mp: 162 - 163 °C. <sup>1</sup>H NMR (400 MHz, CDCl<sub>3</sub>) δ 8.97 – 8.77 (m, 1H), 7.95 – 7.80 (m, 3H), 7.75 – 7.56 (m, 2H), 4.37 – 4.22 (m, 1H), 4.17 – 4.03 (m, 1H), 3.55 – 3.22 (m, 2H), 2.79 – 2.59 (m, 1H), 2.41 – 2.20 (m, 1H), 2.08 – 1.88 (m, 1H). <sup>13</sup>C NMR (100 MHz, CDCl<sub>3</sub>) δ 158.84, 141.01, 135.71, 129.59, 129.46, 128.00, 127.75, 127.38, 125.44, 126.65 (q, *J* = 276.4 Hz), 119.60, 116.98, 43.46, 39.08 (q, *J* = 2.8 Hz), 35.89 (q, *J* = 29.4 Hz), 26.73. <sup>19</sup>F NMR (470 MHz, CDCl<sub>3</sub>) δ -64.57 (t, *J* = 10.8 Hz). HRMS (ESI) *m/z*: [M + H]<sup>+</sup> Calcd for C<sub>16</sub>H<sub>14</sub>F<sub>3</sub>N<sub>2</sub>O<sub>2</sub>S 355.0723; Found 355.0730.

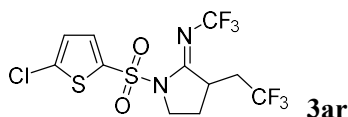

After stirring at 30 °C, 10 mA for 3.5 hours, the residue was purified by column chromatography (silica gel, EtOAc/Petroleum ether: 1/8) to afford the title compound (46% yield, 57 mg) as yellow solid, mp: 84 - 85 °C. <sup>1</sup>H NMR (400 MHz, CDCl<sub>3</sub>) δ 7.70 (d, *J* = 4.2 Hz, 1H), 6.99 (d, *J* = 4.1 Hz, 1H), 4.09 – 4.01 (m, 1H), 3.97 – 3.88 (m, 1H), 3.49 – 3.39 (m, 1H), 2.52 – 2.36 (m, 1H), 2.33 – 2.16 (m, 3H). <sup>13</sup>C NMR (125 MHz, CDCl<sub>3</sub>) δ 165.92 (q, *J* = 6.6 Hz), 140.80, 135.90, 134.02, 126.92, 125.62 (q, *J* = 277.8 Hz), 124.22 (q, *J* = 257.4 Hz), 46.72, 37.39, 34.13 (q,

$J = 29.1$  Hz), 25.35.  $^{19}\text{F}$  NMR (470 MHz,  $\text{CDCl}_3$ )  $\delta$  -51.96, -64.31 (t,  $J = 10.1$  Hz). HRMS (ESI)  $m/z$ :  $[\text{M} + \text{H}]^+$  Calcd for  $\text{C}_{11}\text{H}_{10}\text{ClF}_6\text{N}_2\text{O}_2\text{S}_2$  414.9771; Found 414.9779.

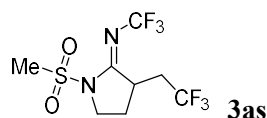

After stirring at 30 °C for 2 hours, the residue was purified by column chromatography (silica gel, EtOAc/Petroleum ether: 1/5) to afford the title compound (44% yield, 41 mg) as colorless oil.  $^1\text{H}$  NMR (400 MHz,  $\text{CDCl}_3$ )  $\delta$  4.06 – 3.95 (m, 1H), 3.91 – 3.81 (m, 1H), 3.58 – 3.46 (m, 1H), 3.35 (s, 3H), 2.60 – 2.45 (m, 1H), 2.43 – 2.17 (m, 3H).  $^{13}\text{C}$  NMR (125 MHz,  $\text{CDCl}_3$ )  $\delta$  167.53 (q,  $J = 6.7$  Hz), 125.70 (q,  $J = 277.6$  Hz), 123.31 (q,  $J = 256.9$  Hz), 45.96, 40.79, 37.67, 34.12 (q,  $J = 29.6$  Hz), 25.37.  $^{19}\text{F}$  NMR (470 MHz,  $\text{CDCl}_3$ )  $\delta$  -51.94, -64.28. HRMS (ESI)  $m/z$ :  $[\text{M} + \text{H}]^+$  Calcd for  $\text{C}_8\text{H}_{11}\text{F}_6\text{N}_2\text{O}_2\text{S}$  313.0440; Found 313.0449.

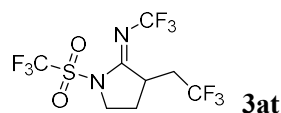

After stirring at 30 °C for 2 hours, the residue was purified by column chromatography (silica gel, DCM/Petroleum ether: 1/2) to afford the title compound (49% yield, 54 mg) as colorless oil.  $^1\text{H}$  NMR (500 MHz,  $\text{CDCl}_3$ )  $\delta$  4.15 – 4.05 (m, 1H), 4.02 – 3.93 (m, 1H), 3.61 – 3.53 (m, 1H), 2.60 – 2.46 (m, 1H), 2.42 – 2.26 (m, 3H).  $^{13}\text{C}$  NMR (125 MHz,  $\text{CDCl}_3$ )  $\delta$  166.49 (q,  $J = 7.5$  Hz), 125.40 (q,  $J = 277.5$  Hz), 122.79 (q,  $J = 258.9$  Hz), 119.55 (q,  $J = 324.2$  Hz), 48.00, 37.20, 33.76 (q,  $J = 29.6$  Hz), 25.50.  $^{19}\text{F}$  NMR (376 MHz,  $\text{CDCl}_3$ )  $\delta$  -53.90, -64.23 (t,  $J = 10.0$  Hz), -72.94. HRMS (ESI)  $m/z$ :  $[\text{M} + \text{H}]^+$  Calcd for  $\text{C}_8\text{H}_8\text{F}_9\text{N}_2\text{O}_2\text{S}$  367.0157; Found 367.0164.

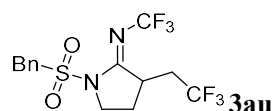

After stirring at 30 °C for 2 hours, the residue was purified by column chromatography (silica gel, EtOAc/Petroleum ether: 1/10) to afford the title compound (27% yield, 32 mg) as white solid, mp: 103 - 104 °C.  $^1\text{H}$  NMR (400 MHz,  $\text{CDCl}_3$ )  $\delta$  7.47 – 7.32 (m, 5H), 4.83 (d,  $J = 14.3$  Hz, 1H), 4.75 (d,  $J = 14.3$  Hz, 1H), 3.47 – 3.37 (m, 2H), 3.37 – 3.28 (m, 1H), 2.44 – 2.30 (m, 1H), 2.06 – 1.74 (m, 3H).  $^{13}\text{C}$  NMR (125 MHz,  $\text{CDCl}_3$ )  $\delta$  167.64 (q,  $J = 6.9$  Hz), 130.48, 129.82, 129.16, 127.72, 125.53 (q,  $J = 277.6$  Hz), 123.45 (q,  $J = 257.3$  Hz), 58.03, 47.45, 37.54, 33.69 (q,  $J = 30.6$  Hz), 25.44.  $^{19}\text{F}$  NMR (470 MHz,  $\text{CDCl}_3$ )  $\delta$  -51.68, -64.56 (t,  $J = 10.1$  Hz). HRMS (ESI)  $m/z$ :  $[\text{M} + \text{Na}]^+$  Calcd for  $\text{C}_{14}\text{H}_{14}\text{F}_6\text{N}_2\text{NaO}_2\text{S}$  411.0572; Found 411.0584.

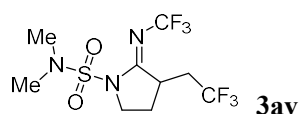





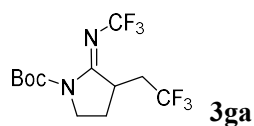

After stirring at 30 °C, 5 mA for 6 hours, the residue was purified by column chromatography (silica gel, EtOAc/Petroleum ether: 1/5) to afford the title compound (47% yield, 47 mg) as white solid, mp: 124 - 125 °C. <sup>1</sup>H NMR (400 MHz, CDCl<sub>3</sub>) δ 3.98 – 3.88 (m, 1H), 3.81 – 3.68 (m, 1H), 3.53 – 3.44 (m, 1H), 2.62 – 2.43 (m, 1H), 2.33 – 2.20 (m, 1H), 2.19 – 2.04 (m, 2H), 1.53 (s, 9H). <sup>13</sup>C NMR (125 MHz, CDCl<sub>3</sub>) δ 168.07 (q, *J* = 5.0 Hz), 149.34, 125.88 (q, *J* = 278.0 Hz), 124.44 (q, *J* = 257.2 Hz), 84.08, 45.98, 37.67, 34.17 (q, *J* = 29.0 Hz), 28.08, 24.53. <sup>19</sup>F NMR (470 MHz, CDCl<sub>3</sub>) δ -51.08, -64.40 (t, *J* = 10.2 Hz). HRMS (ESI) *m/z*: [M – Boc + H]<sup>+</sup> Calcd for C<sub>7</sub>H<sub>9</sub>F<sub>6</sub>N<sub>2</sub> 235.0664; Found 235.0656.

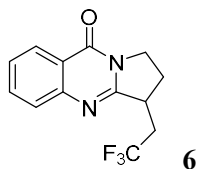

After stirring at 30 °C for 2 hours (Scheme 5b), the residue was purified by column chromatography (silica gel, EtOAc/Petroleum ether: 1/2) to afford the title compound (54% yield, 43 mg) as white solid, mp: 124 - 127 °C. <sup>1</sup>H NMR (400 MHz, CDCl<sub>3</sub>) δ 8.32 – 8.20 (m, 1H), 7.77 – 7.69 (m, 1H), 7.64 (d, *J* = 7.6 Hz, 1H), 7.49 – 7.41 (m, 1H), 4.45 – 4.31 (m, 1H), 4.04 – 3.83 (m, 1H), 3.59 – 3.43 (m, 1H), 3.34 – 3.14 (m, 1H), 2.73 – 2.57 (m, 1H), 2.38 – 2.17 (m, 1H), 2.12 – 1.93 (m, 1H). <sup>13</sup>C NMR (100 MHz, CDCl<sub>3</sub>) δ 160.83, 158.65, 148.99, 134.39, 127.18, 126.78, 126.70 (q, *J* = 276.7 Hz), 126.56, 120.95, 44.81, 38.45 (q, *J* = 2.8 Hz), 36.07 (q, *J* = 29.1 Hz), 27.59. <sup>19</sup>F NMR (376 MHz, CDCl<sub>3</sub>) δ -64.68 (t, *J* = 10.8 Hz). HRMS (ESI) *m/z*: [M + H]<sup>+</sup> Calcd for C<sub>13</sub>H<sub>12</sub>F<sub>3</sub>N<sub>2</sub>O 269.0896; Found 269.0906. NMR spectra data were in accordance with the reported data<sup>11</sup>.

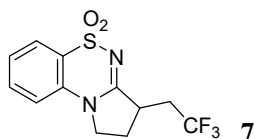

After stirring at 30 °C for 2 hours (Scheme 5b), the residue was purified by column chromatography (silica gel, EtOAc /Petroleum ether: 1/1) to afford the title compound (41% yield, 38 mg) as white solid, mp: 192 - 195 °C. <sup>1</sup>H NMR (500 MHz, CDCl<sub>3</sub>) δ 8.03 – 7.81 (m, 1H), 7.74 – 7.58 (m, 1H), 7.44 (t, *J* = 7.7 Hz, 1H), 7.08 (d, *J* = 8.3 Hz, 1H), 4.24 – 4.13 (m, 1H), 4.07 – 3.91 (m, 1H), 3.57 – 3.34 (m, 1H), 3.19 – 2.96 (m, 1H), 2.81 – 2.58 (m, 1H), 2.40 – 2.20 (m, 1H), 2.18 – 2.01 (m, 1H). <sup>13</sup>C NMR (125 MHz, CDCl<sub>3</sub>) δ 161.93, 134.53, 133.29, 127.01, 126.40 (q, *J* = 276.4 Hz), 125.22, 122.02, 115.16, 48.11, 39.45, 35.67 (q, *J* = 29.6 Hz), 26.11. NMR spectra data were in accordance with the reported data.<sup>10</sup>

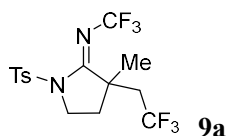

After stirring at 30 °C for 2 hours, the residue was purified by column chromatography (silica gel, EtOAc/Petroleum ether: 1/10) to afford the title compound (60% yield, 72 mg) as white solid, mp: 103 - 104 °C. <sup>1</sup>H NMR (400 MHz, CDCl<sub>3</sub>) δ 7.88 (d, *J* = 8.3 Hz, 2H), 7.32 (d, *J* = 8.1 Hz, 2H), 4.05 – 3.98 (m, 1H), 3.97 – 3.89 (m, 1H), 2.59 – 2.47 (m, 1H), 2.45 (s, 3H), 2.41 – 2.28 (m, 2H), 2.09 – 1.98 (m, 1H), 1.30 (s, 3H). <sup>13</sup>C NMR (125 MHz, CDCl<sub>3</sub>) δ 166.79 (q, *J* = 6.8 Hz), 145.70, 133.77, 129.48, 129.34, 125.84 (q, *J* = 278.4 Hz), 122.80 (q, *J* = 255.3 Hz), 45.38, 45.25, 39.02 (q, *J* = 28.1 Hz), 33.94, 22.21, 21.88. <sup>19</sup>F NMR (470 MHz, CDCl<sub>3</sub>) δ -46.02, -59.93 (t, *J* = 10.9 Hz). HRMS (ESI) *m/z*: [M + H]<sup>+</sup> Calcd for C<sub>15</sub>H<sub>17</sub>F<sub>6</sub>N<sub>2</sub>O<sub>2</sub>S 403.0909; Found 403.0919.

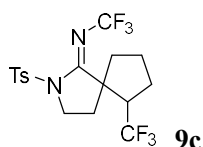

After stirring at 30 °C, 10 mA for 3.5 hours, the residue was purified by column chromatography (silica gel, EtOAc /Petroleum ether: 1/10) to afford the title compound (39% yield, 50 mg) as white solid, mp: 110 - 112 °C. <sup>1</sup>H NMR (500 MHz, CDCl<sub>3</sub>) δ 7.86 (d, *J* = 8.3 Hz, 2H), 7.30 (d, *J* = 8.2 Hz, 2H), 4.06 – 3.98 (m, 1H), 3.90 – 3.82 (m, 1H), 3.25 – 3.08 (m, 1H), 2.44 (s, 3H), 2.40 – 2.31 (m, 1H), 2.10 – 1.95 (m, 2H), 1.94 – 1.86 (m, 1H), 1.84 – 1.72 (m, 4H). <sup>13</sup>C NMR (125 MHz, CDCl<sub>3</sub>) δ 166.34 (q, *J* = 6.6 Hz), 145.47, 133.98, 129.48, 129.21, 126.68 (q, *J* = 279.1 Hz), 122.90 (q, *J* = 255.3 Hz), 55.05, 47.78 (q, *J* = 26.1 Hz), 45.43, 36.32, 30.19, 24.82, 21.87, 21.52. <sup>19</sup>F NMR (470 MHz, CDCl<sub>3</sub>) δ -45.31, -64.54 (d, *J* = 9.0 Hz). HRMS (ESI) *m/z*: [M + H]<sup>+</sup> Calcd for C<sub>17</sub>H<sub>19</sub>F<sub>6</sub>N<sub>2</sub>O<sub>2</sub>S 429.1066; Found 429.1076.

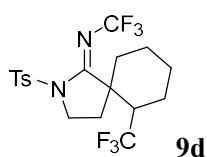

After stirring at 30 °C, 10 mA for 3.5 hours, the residue was purified by column chromatography (silica gel, EtOAc /Petroleum ether: 1/10) to afford the title compound (37% yield, 49 mg) as white solid, mp: 112 - 115 °C. <sup>1</sup>H NMR (400 MHz, CDCl<sub>3</sub>) δ 7.86 (d, *J* = 8.4 Hz, 2H), 7.29 (d, *J* = 8.1 Hz, 2H), 4.01 – 3.87 (m, 2H), 2.91 – 2.75 (m, 1H), 2.43 (s, 3H), 4.01 – 3.87 (m, 1H), 2.11 – 2.03 (m, 1H), 1.93 – 1.85 (m, 1H), 1.85 – 1.77 (m, 2H), 1.73 – 1.65 (m, 1H), 1.63 – 1.54 (m, 1H), 1.44 – 1.25 (m, 3H). <sup>13</sup>C NMR (125 MHz, CDCl<sub>3</sub>) δ 166.46 (q, *J* = 6.7 Hz), 145.23, 133.70, 129.43, 128.97, 126.62 (q, *J* = 281.1 Hz), 122.72 (q, *J* = 254.7 Hz), 49.66, 45.02, 43.97 (q, *J* = 25.9 Hz), 32.92, 26.48, 23.79, 22.55, 21.72, 21.16. <sup>19</sup>F NMR (470 MHz, CDCl<sub>3</sub>) δ -44.47, -66.64 (d, *J* = 8.8 Hz). HRMS (ESI) *m/z*: [M + H]<sup>+</sup> Calcd for C<sub>18</sub>H<sub>21</sub>F<sub>6</sub>N<sub>2</sub>O<sub>2</sub>S 443.1222; Found 443.1230.

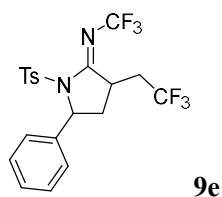

After stirring at 30 °C for 2 hours, the residue was purified by column chromatography (silica gel, EtOAc/Petroleum ether: 1/10) to afford the major isomer (48% yield, 66 mg) as white solid, mp: 88 - 90 °C. <sup>1</sup>H NMR (400 MHz, CDCl<sub>3</sub>) δ 7.45 (d, *J* = 8.3 Hz, 2H), 7.37 – 7.28 (m, 3H), 7.20 – 7.07 (m, 4H), 5.45 (t, *J* = 7.4 Hz, 1H), 3.56 – 3.43 (m, 1H), 2.71 – 2.52 (m, 2H), 2.40 (s, 3H), 2.37 – 2.26 (m, 1H), 2.25 – 2.15 (m, 1H). <sup>13</sup>C NMR (125 MHz, CDCl<sub>3</sub>) δ 166.48 (q, *J* = 7.0 Hz), 145.44, 139.80, 134.39, 129.62, 129.00, 128.71, 126.97, 125.78 (q, *J* = 278.2 Hz), 123.38 (q, *J* = 257.4 Hz), 63.17, 36.86, 36.08, 35.31 (q, *J* = 29.4 Hz), 21.77. <sup>19</sup>F NMR (470 MHz, CDCl<sub>3</sub>) δ -51.42, -64.17 (t, *J* = 10.2 Hz). HRMS (ESI) *m/z*: [M + H]<sup>+</sup> Calcd for C<sub>20</sub>H<sub>19</sub>F<sub>6</sub>N<sub>2</sub>O<sub>2</sub>S 465.1066; Found 465.1070.

The minor isomer (14% yield, 20 mg) as white solid, mp: 170 - 172 °C. <sup>1</sup>H NMR (400 MHz, CDCl<sub>3</sub>) δ 7.89 (d, *J* = 8.4 Hz, 2H), 7.41 (t, *J* = 7.3 Hz, 2H), 7.38 – 7.31 (m, 3H), 7.28 (d, *J* = 7.4 Hz, 2H), 5.70 (d, *J* = 9.1 Hz, 1H), 3.37 (t, *J* = 10.1 Hz, 1H), 2.79 – 2.67 (m, 1H), 2.40 (s, 3H), 2.44 – 2.34 (m, 1H), 2.22 (d, *J* = 13.5 Hz, 1H), 2.07 – 1.83 (m, 1H). <sup>13</sup>C NMR (125 MHz, CDCl<sub>3</sub>) δ 166.29 (q, *J* = 7.5 Hz), 145.97, 141.31, 134.24, 130.06, 129.32, 128.36, 125.28, 125.58 (q, *J* = 277.8 Hz), 123.21 (q, *J* = 256.9 Hz), 63.41, 36.52, 36.21 (q, *J* = 29.7 Hz), 35.51, 21.90. <sup>19</sup>F NMR (470 MHz, CDCl<sub>3</sub>) δ -51.72, -65.45 (t, *J* = 10.1 Hz). HRMS (ESI) *m/z*: [M + H]<sup>+</sup> Calcd for C<sub>20</sub>H<sub>19</sub>F<sub>6</sub>N<sub>2</sub>O<sub>2</sub>S 465.1066; Found 465.1073.

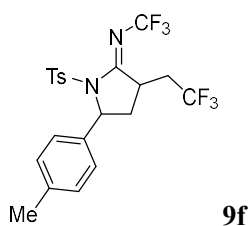

After stirring at 30 °C for 2 hours, the residue was purified by column chromatography (silica gel, EtOAc/Petroleum ether: 1/10) to afford the major isomer (40% yield, 57 mg) as white solid, mp: 117 - 120 °C. <sup>1</sup>H NMR (400 MHz, CDCl<sub>3</sub>) δ 7.47 (d, *J* = 8.3 Hz, 2H), 7.17 – 7.10 (m, 4H), 7.03 (d, *J* = 8.0 Hz, 2H), 5.40 (t, *J* = 7.4 Hz, 1H), 3.58 – 3.40 (m, 1H), 2.67 – 2.52 (m, 2H), 2.40 (s, 3H), 2.37 (s, 3H), 2.34 – 2.23 (m, 1H), 2.22 – 2.12 (m, 1H). <sup>13</sup>C NMR (125 MHz, CDCl<sub>3</sub>) δ 166.52 (q, *J* = 6.9 Hz), 145.38, 138.58, 136.83, 134.47, 129.62, 128.91, 126.88, 125.78 (q, *J* = 277.4 Hz), 123.40 (q, *J* = 257.7 Hz), 63.05, 36.84, 36.14, 35.22 (q, *J* = 29.4 Hz), 21.75, 21.25. <sup>19</sup>F NMR (470 MHz, CDCl<sub>3</sub>) δ -51.34, -64.22 (t, *J* = 10.2 Hz). HRMS (ESI) *m/z*: [M + H]<sup>+</sup> Calcd for C<sub>21</sub>H<sub>21</sub>F<sub>6</sub>N<sub>2</sub>O<sub>2</sub>S 479.1222; Found 479.1223.

The minor isomer (10% yield, 14 mg) as white solid, mp: 175 - 177 °C. <sup>1</sup>H NMR (400 MHz, CDCl<sub>3</sub>) δ 7.89 (d, *J* = 8.3 Hz, 2H), 7.32 (d, *J* = 8.1 Hz, 2H), 7.21 (d, *J* = 8.1 Hz, 2H), 7.16 (d, *J* = 8.1 Hz, 2H), 5.67 (d, *J* = 9.1 Hz, 1H), 3.35 (t, *J* = 10.0 Hz, 1H), 2.77 – 2.65 (m, 1H), 2.46 (s, 3H), 2.44 – 2.40 (m, 1H), 2.37 (s, 3H), 2.20 (d, *J* = 13.5 Hz, 1H), 2.05 – 1.91 (m, 1H). <sup>13</sup>C NMR (125 MHz, CDCl<sub>3</sub>) δ 166.35 (q, *J* = 6.8 Hz), 145.90, 138.32, 138.12, 134.29, 130.05, 129.96, 129.29, 125.62 (q, *J* = 277.7 Hz), 125.15, 123.23 (q, *J* = 256.9 Hz), 63.33, 36.52, 36.24 (q, *J* = 28.9 Hz), 35.57, 21.89, 21.22. <sup>19</sup>F NMR (470 MHz, CDCl<sub>3</sub>) δ -51.68, -65.45 (t, *J* = 10.1 Hz). HRMS (ESI) *m/z*: [M + H]<sup>+</sup> Calcd for C<sub>21</sub>H<sub>21</sub>F<sub>6</sub>N<sub>2</sub>O<sub>2</sub>S 479.1222; Found 479.1232.

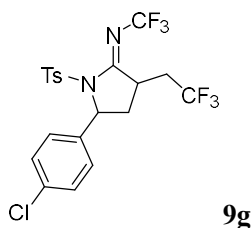

After stirring at 30 °C for 2 hours, the residue was purified by column chromatography (silica gel, EtOAc/Petroleum ether: 1/10) to afford the major isomer (41% yield, 61 mg) as white solid, mp: 118 - 120 °C. <sup>1</sup>H NMR (400 MHz, CDCl<sub>3</sub>) δ 7.51 (d, *J* = 8.4 Hz, 2H), 7.29 (d, *J* = 8.5 Hz, 2H), 7.19 (d, *J* = 8.1 Hz, 2H), 7.10 (d, *J* = 8.4 Hz, 2H), 5.41 (t, *J* = 7.5 Hz, 1H), 3.58 – 3.40 (m, 1H), 2.63 – 2.51 (m, 2H), 2.42 (s, 3H), 2.36 – 2.22 (m, 1H), 2.17 – 2.03 (m, 1H). <sup>13</sup>C NMR (125 MHz, CDCl<sub>3</sub>) δ 166.41 (q, *J* = 6.6 Hz), 145.75, 138.46, 134.58, 134.33, 129.49, 129.17, 129.12, 128.30, 125.70 (q, *J* = 277.4 Hz), 123.30 (q, *J* = 257.7 Hz), 62.48, 36.74, 35.95, 35.04 (q, *J* = 29.8 Hz), 21.79. <sup>19</sup>F NMR (470 MHz, CDCl<sub>3</sub>) δ -51.62, -64.17 (t, *J* = 10.1 Hz). HRMS (ESI) *m/z*: [M + H]<sup>+</sup> Calcd for C<sub>20</sub>H<sub>18</sub>ClF<sub>6</sub>N<sub>2</sub>O<sub>2</sub>S 499.0676; Found 499.0684.

The minor isomer (12% yield, 18 mg) as white solid, mp: 203 - 206 °C. <sup>1</sup>H NMR (400 MHz, CDCl<sub>3</sub>) δ 7.89 (d, *J* = 8.4 Hz, 2H), 7.40 (d, *J* = 8.5 Hz, 2H), 7.34 (d, *J* = 8.1 Hz, 2H), 7.25 (d, *J* = 8.7 Hz, 2H), 5.65 (d, *J* = 9.2 Hz, 1H), 3.37 (t, *J* = 10.1 Hz, 1H), 2.82 – 2.65 (m, 1H), 2.47 (s, 3H), 2.47 – 2.32 (m, 1H), 2.19 (d, *J* = 13.6 Hz, 1H), 2.00 – 1.82 (m, 1H). <sup>13</sup>C NMR (125 MHz, CDCl<sub>3</sub>) δ 166.05 (q, *J* = 6.4 Hz), 146.19, 140.01, 134.30, 134.04, 130.02, 129.56, 129.42, 126.71, 125.49 (q, *J* = 277.8 Hz), 123.13 (q, *J* = 256.9 Hz), 77.41, 62.82, 36.44, 36.22 (q, *J* = 30.4 Hz), 35.37, 21.92. <sup>19</sup>F NMR (470 MHz, CDCl<sub>3</sub>) δ -51.85, -65.31 (t, *J* = 10.0 Hz). HRMS (ESI) *m/z*: [M + H]<sup>+</sup> Calcd for C<sub>20</sub>H<sub>18</sub>ClF<sub>6</sub>N<sub>2</sub>O<sub>2</sub>S 499.0676; Found 499.0675.

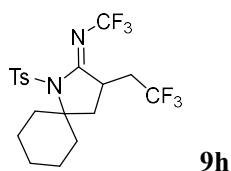

After stirring at 30 °C for 2 hours, the residue was purified by column chromatography (silica gel, EtOAc/Petroleum ether: 1/10) to afford the title compound (49% yield, 67 mg) as white solid, mp: 155 - 156 °C. <sup>1</sup>H NMR (500 MHz, CDCl<sub>3</sub>) δ 7.90 (d, *J* = 8.3 Hz, 2H), 7.29 (d, *J* = 8.1 Hz, 2H), 3.26 (t, *J* = 10.4 Hz, 1H), 2.92 – 2.82 (m, 1H), 2.63 – 2.48 (m, 1H), 2.43 (s, 3H), 2.41 – 2.36 (m, 1H), 2.26 – 2.13 (m, 1H), 2.06 (dd, *J* = 13.8, 9.4 Hz, 1H), 1.90 (d, *J* = 13.9 Hz, 1H), 1.84 (d, *J* = 11.8 Hz, 2H), 1.74 – 1.65 (m, 2H), 1.52 – 1.41 (m, 1H), 1.40 – 1.30 (m, 2H). <sup>13</sup>C NMR (125 MHz, CDCl<sub>3</sub>) δ 166.25 (q, *J* = 6.4 Hz), 145.09, 135.73, 129.85, 129.00, 125.83 (q, *J* = 277.5 Hz), 123.08 (q, *J* = 256.5 Hz), 72.82, 38.36, 36.58 (q, *J* = 29.1 Hz), 36.33, 35.81, 34.59, 24.50, 24.20, 23.50, 21.78. <sup>19</sup>F NMR (470 MHz, CDCl<sub>3</sub>) δ -51.00, -64.18 (t, *J* = 10.0 Hz). HRMS (ESI) *m/z*: [M + H]<sup>+</sup> Calcd for C<sub>19</sub>H<sub>23</sub>F<sub>6</sub>N<sub>2</sub>O<sub>2</sub>S 457.1379; Found 457.1391.

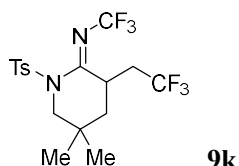

After stirring at 30 °C for 2 hours, the residue was purified by column chromatography (silica gel, EtOAc/Petroleum ether: 1/10) to afford the title compound (25% yield, 32 mg) as white solid, mp: 121 - 122 °C. <sup>1</sup>H NMR (500 MHz, CDCl<sub>3</sub>) δ 7.88 (d, *J* = 8.3 Hz, 2H), 7.30 (d, *J* = 8.2 Hz, 2H), 3.97 (dd, *J* = 13.5, 1.7 Hz, 1H), 3.46 (d, *J* = 13.5 Hz, 1H), 3.38 – 3.28 (m, 1H), 2.44 (s, 3H), 2.39 – 2.26 (m, 2H), 1.83 – 1.65 (m, 2H), 1.12 (s, 3H), 0.82 (s, 3H). <sup>13</sup>C NMR (125 MHz, CDCl<sub>3</sub>) δ 165.38 (q, *J* = 7.0 Hz), 145.29, 134.94, 129.82, 129.16, 125.85 (q, *J* = 278.0 Hz), 122.98 (q, *J* = 257.0 Hz), 56.44, 38.82, 37.98 (q, *J* = 28.8 Hz), 32.72, 32.00, 28.42, 26.46, 21.82. <sup>19</sup>F NMR (470 MHz, CDCl<sub>3</sub>) δ -51.01, -63.83 (t, *J* = 9.9 Hz). HRMS (ESI) *m/z*: [M + H]<sup>+</sup> Calcd for C<sub>17</sub>H<sub>21</sub>F<sub>6</sub>N<sub>2</sub>O<sub>2</sub>S 431.1222; Found 431.1232.

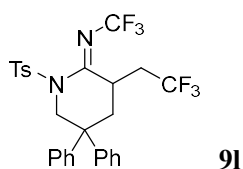

After stirring at 30 °C for 2 hours, the residue was purified by column chromatography (silica gel, EtOAc/Petroleum ether: 1/10) to afford the title compound (33% yield, 55 mg) as white solid, mp: 153 - 154 °C. <sup>1</sup>H NMR (400 MHz, CDCl<sub>3</sub>) δ 7.76 (d, *J* = 8.2 Hz, 2H), 7.31 (t, *J* = 7.6 Hz, 2H), 7.25 (d, *J* = 7.8 Hz, 3H), 7.15 – 7.09 (m, 3H), 7.07 (t, *J* = 7.3 Hz, 2H), 6.90 (d, *J* = 7.4 Hz, 2H), 4.62 (dd, *J* = 12.8, 2.7 Hz, 1H), 4.30 (d, *J* = 12.8 Hz, 1H), 3.55 – 3.26 (m, 1H), 3.07 – 2.94 (m, 1H), 2.45 (s, 3H), 2.43 – 2.30 (m, 3H). <sup>13</sup>C NMR (125 MHz, CDCl<sub>3</sub>) δ 164.97 (q, *J* = 6.6 Hz), 157.78, 145.16, 144.97, 140.96, 134.26, 129.81, 129.18, 129.02, 128.93, 127.46, 127.19, 126.30, 125.90 (q, *J* = 278.3 Hz), 122.69 (q, *J* = 257.4 Hz), 55.43, 46.37, 39.02 (q, *J* = 28.9 Hz), 38.15, 34.15, 21.80. <sup>19</sup>F NMR (470 MHz, CDCl<sub>3</sub>) δ -51.90, -63.63 (t, *J* = 10.1 Hz). HRMS (ESI) *m/z*: [M + H]<sup>+</sup> Calcd for C<sub>27</sub>H<sub>25</sub>F<sub>6</sub>N<sub>2</sub>O<sub>2</sub>S 555.1535; Found 555.1538.

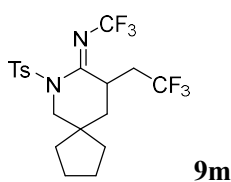

After stirring at 30 °C for 2 hours, the residue was purified by column chromatography (silica gel, EtOAc/Petroleum ether: 1/10) to afford the title compound (32% yield, 44 mg) as colorless oil. <sup>1</sup>H NMR (500 MHz, CDCl<sub>3</sub>) δ 7.89 (d, *J* = 8.3 Hz, 2H), 7.31 (d, *J* = 8.2 Hz, 2H), 3.87 (dd, *J* = 13.0, 2.1 Hz, 1H), 3.57 (d, *J* = 13.0 Hz, 1H), 3.41 – 3.33 (m, 1H), 2.44 (s, 3H), 2.41 – 2.33 (m, 2H), 2.02 – 1.89 (m, 1H), 1.83 – 1.76 (m, 1H), 1.73 – 1.59 (m, 5H), 1.55 – 1.47 (m, 1H), 1.23 (t, *J* = 7.1 Hz, 2H). <sup>13</sup>C NMR (125 MHz, CDCl<sub>3</sub>) δ 166.28 (q, *J* = 6.9 Hz), 145.25, 134.87, 129.73, 129.20, 125.89 (q, *J* = 278.0 Hz), 122.93 (q, *J* = 257.5 Hz), 55.41, 43.14, 38.81, 38.24 (q, *J* = 28.9 Hz), 38.09, 36.67, 33.53, 24.53, 24.45, 21.83. <sup>19</sup>F NMR (470 MHz, CDCl<sub>3</sub>) δ -51.36, -63.88 (t, *J* = 10.1 Hz). HRMS (ESI) *m/z*: [M + H]<sup>+</sup> Calcd for C<sub>19</sub>H<sub>23</sub>F<sub>6</sub>N<sub>2</sub>O<sub>2</sub>S 457.1379; Found 457.1389.

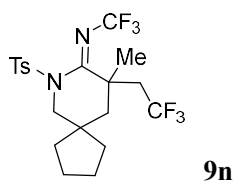

After stirring at 30 °C for 2 hours, the residue was purified by column chromatography (silica gel, EtOAc /Petroleum ether: 1/10) to afford the title compound (10% yield, 14 mg) as colorless oil. <sup>1</sup>H NMR (500 MHz, CDCl<sub>3</sub>) δ 7.79 (d, *J* = 8.2 Hz, 2H), 7.32 (d, *J* = 8.1 Hz, 2H), 3.63 (d, *J* = 11.5 Hz, 1H), 3.48 (d, *J* = 11.7 Hz, 1H), 2.55 – 2.48 (m, 2H), 2.45 (s, 3H), 2.11 (d, *J* = 14.2 Hz, 1H), 1.72 (s, 1H), 1.70 – 1.62 (m, 4H), 1.59 – 1.51 (m, 2H), 1.47 – 1.40 (m, 2H), 1.39 (s, 3H). <sup>13</sup>C NMR (125 MHz, CDCl<sub>3</sub>) δ 164.31, 144.90, 135.55, 129.50, 128.93, 126.23 (q, *J* = 278.9 Hz), 121.83 (q, *J* = 256.8 Hz), 56.23, 48.65, 43.02, 42.82, 42.71 (q, *J* = 27.2 Hz), 37.73, 36.94, 25.81, 24.43, 24.05, 21.80. <sup>19</sup>F NMR (470 MHz, CDCl<sub>3</sub>) δ -58.30 (t, *J* = 10.9 Hz). HRMS (ESI) *m/z*: [M + H]<sup>+</sup> Calcd for C<sub>20</sub>H<sub>25</sub>F<sub>6</sub>N<sub>2</sub>O<sub>2</sub>S 471.1535; Found 471.1542.

## 2. General procedure for preparation of products 4

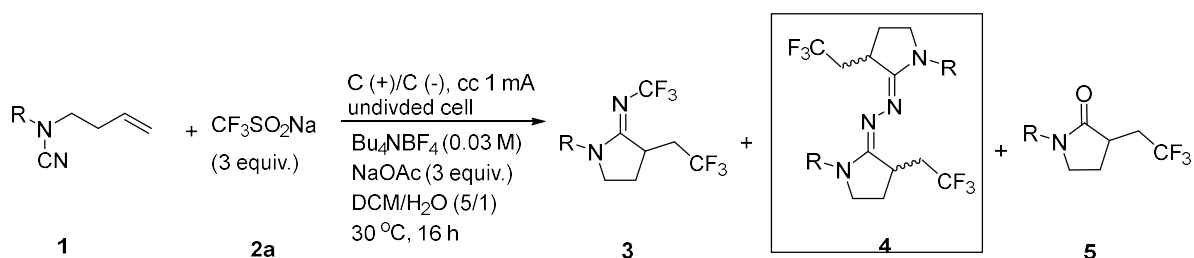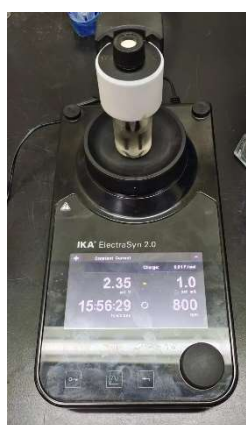

In the IKA ElectraSyn 2.0 undivided cell (25 mL) equipped with a stir bar, a mixture of **1** (0.3 mmol), CF<sub>3</sub>SO<sub>2</sub>Na **2a** (0.9 mmol), Bu<sub>4</sub>NBF<sub>4</sub> (0.3 mmol), NaOAc (0.9 mmol) and DCM/H<sub>2</sub>O (v/v = 5/1, 10 mL) were added. The cell was equipped with two graphite plate electrodes (0.8 cm × 1.5 cm × 0.2 cm). The reaction mixture was stirred and electrolyzed at a constant current of 1 mA at 30 °C for 16 h. Upon completion, 5 mL H<sub>2</sub>O was added, the mixture was extracted with DCM (8 mL × 3). The combined organic layer was washed with brine, dried over Na<sub>2</sub>SO<sub>4</sub>, filtered, and concentrated *in vacuo*. The residue was purified by column chromatography (silica gel, EtOAc/Petroleum ether (60-90 °C)) to provide the desired products **4**.

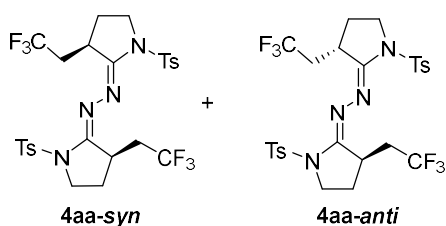

After stirring at 30 °C, 1 mA for 16 hours, the residue was purified by column chromatography (silica gel, EtOAc/Petroleum ether: 1/5) to afford the title compound **4aa-syn** (21% yield, 20 mg) as white solid, mp: 238 - 240 °C. <sup>1</sup>H NMR (400 MHz, CDCl<sub>3</sub>) δ 7.76 (d, *J* = 8.2 Hz, 4H), 7.27 (d, *J* = 8.4 Hz, 4H), 4.10 – 3.80 (m, 4H), 3.52 – 3.42 (m, 2H), 3.05 – 2.74 (m, 2H), 2.41 (s, 6H), 2.24 – 2.00 (m, 6H). <sup>13</sup>C NMR (125 MHz, CDCl<sub>3</sub>) δ 160.44, 144.66, 136.04, 129.62, 127.54, 126.50 (q, *J* = 277.6 Hz), 48.21, 35.16, 33.47 (q, *J* = 28.0 Hz), 24.62, 21.71. <sup>19</sup>F NMR (376 MHz, CDCl<sub>3</sub>) δ -62.55 (t, *J* = 10.9 Hz). HRMS (ESI) *m/z*: [M + H]<sup>+</sup> Calcd for C<sub>26</sub>H<sub>29</sub>F<sub>6</sub>N<sub>4</sub>O<sub>4</sub>S<sub>2</sub> 639.1529; Found 639.1539.

Compound **4aa-anti** (21% yield, 20 mg) as white solid, mp: 249 - 251 °C. <sup>1</sup>H NMR (400 MHz, CDCl<sub>3</sub>) δ 7.75 (d, *J* = 8.3 Hz, 4H), 7.28 (d, *J* = 8.1 Hz, 4H), 4.14 – 4.05 (m, 2H), 3.87 – 3.76 (m, 2H), 3.51 – 3.42 (m, 2H), 2.96 – 2.78 (m, 2H), 2.43 (s, 6H), 2.26 – 2.07 (m, 4H), 2.05 – 1.90 (m, 2H). <sup>13</sup>C NMR (125 MHz, CDCl<sub>3</sub>) δ 160.43, 144.81, 135.76, 129.60, 127.64, 126.47 (q, *J* = 278.4 Hz), 48.16, 35.36, 32.94 (q, *J* = 28.6 Hz), 24.42, 21.78. <sup>19</sup>F NMR (470 MHz, CDCl<sub>3</sub>) δ -62.44 (t, *J* = 10.9 Hz). HRMS (ESI) *m/z*: [M + H]<sup>+</sup> Calcd for C<sub>26</sub>H<sub>29</sub>F<sub>6</sub>N<sub>4</sub>O<sub>4</sub>S<sub>2</sub> 639.1529; Found 639.1540.

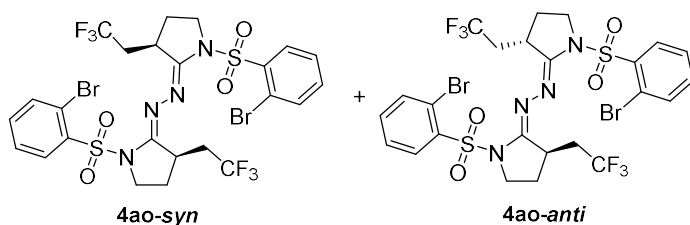

After stirring at 30 °C, 1 mA for 16 hours, the residue was purified by column chromatography (silica gel, EtOAc/Petroleum ether: 1/5) to afford the title compound **4ao-syn** (20% yield, 22 mg) as white solid, mp: 254 - 257 °C. <sup>1</sup>H NMR (500 MHz, CDCl<sub>3</sub>) δ 8.24 (dd, *J* = 7.3, 2.2 Hz, 2H), 7.74 (dd, *J* = 7.2, 1.8 Hz, 2H), 7.54 – 7.42 (m, 4H), 4.25 – 4.10 (m, 4H), 3.25 – 3.04 (m, 2H), 2.88 – 2.75 (m, 2H), 2.24 – 1.97 (m, 6H). <sup>13</sup>C NMR (125 MHz, DMSO) δ 159.84, 137.57, 135.49, 135.15, 132.12, 126.60 (q, *J* = 278.6 Hz), 119.16, 47.87, 34.50, 32.42 (q, *J* = 27.2 Hz), 24.00. <sup>19</sup>F NMR (470 MHz, DMSO) δ -61.29 (t, *J* = 11.4 Hz). HRMS (ESI) *m/z*: [M + H]<sup>+</sup> Calcd for C<sub>24</sub>H<sub>23</sub>Br<sub>2</sub>F<sub>6</sub>N<sub>4</sub>O<sub>4</sub>S<sub>2</sub> 766.9426; Found 766.9417.

Compound **4ao-anti** (20% yield, 22 mg) as white solid, mp: 265 - 268 °C. <sup>1</sup>H NMR (500 MHz, CDCl<sub>3</sub>) δ 8.21 (dd, *J* = 7.7, 1.9 Hz, 2H), 7.69 (dd, *J* = 7.6, 1.3 Hz, 2H), 7.51 – 7.35 (m, 4H), 4.37 – 4.18 (m, 2H), 4.09 – 3.91 (m, 2H), 3.29 – 3.12 (m, 2H), 2.80 – 2.58 (m, 2H), 2.23 – 1.90 (m, 6H). <sup>13</sup>C NMR (125 MHz, CDCl<sub>3</sub>) δ 160.71, 138.62, 135.43, 134.51, 133.21, 127.60, 126.37 (q, *J* = 278.4 Hz), 120.14, 48.12, 35.11, 32.83 (q, *J* = 28.5 Hz), 24.09. <sup>19</sup>F NMR (470 MHz, CDCl<sub>3</sub>) δ -61.85 (t, *J* = 10.9 Hz). HRMS (ESI) *m/z*: [M + H]<sup>+</sup> Calcd for C<sub>24</sub>H<sub>23</sub>Br<sub>2</sub>F<sub>6</sub>N<sub>4</sub>O<sub>4</sub>S<sub>2</sub> 766.9426; Found 766.9419.

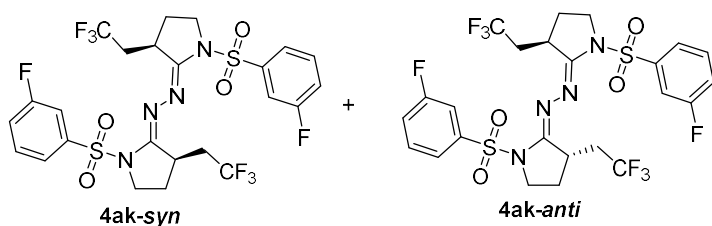

After stirring at 30 °C, 1 mA for 16 hours, the residue was purified by column chromatography (silica gel, EtOAc/Petroleum ether: 1/3) to afford the title compound **4ak-syn** (23% yield, 23 mg) as yellow solid, mp: 225 - 247 °C. <sup>1</sup>H NMR (400 MHz, CDCl<sub>3</sub>) δ 7.69 (d, *J* = 7.8 Hz, 2H), 7.64 – 7.59 (m, 2H), 7.52 – 7.44 (m, 2H), 7.36 – 7.27 (m, 2H), 4.14 – 3.97 (m, 2H), 3.93 – 3.80 (m, 2H), 3.54 – 3.36 (m, 2H), 3.14 – 2.87 (m, 2H), 2.36 – 2.06 (m, 6H). <sup>13</sup>C NMR (100 MHz, CDCl<sub>3</sub>) δ 162.28 (d, *J* = 251.7 Hz), 160.56, 140.77 (d, *J* = 7.0 Hz), 130.86 (d, *J* = 7.7 Hz), 126.42 (q, *J* = 277.8 Hz), 123.29 (d, *J* = 3.3 Hz), 120.95 (d, *J* = 21.2 Hz), 115.10 (d, *J* = 24.8 Hz), 48.36, 35.32 (q, *J* = 2.8 Hz), 33.84 (q, *J* = 28.4 Hz), 24.84. <sup>19</sup>F NMR (376 MHz, CDCl<sub>3</sub>) δ -62.83 (t, *J* = 10.8 Hz), -109.47 – -109.57 (m). HRMS (ESI) *m/z*: [M + H]<sup>+</sup> Calcd for C<sub>24</sub>H<sub>22</sub>F<sub>8</sub>N<sub>4</sub>O<sub>4</sub>S<sub>2</sub> 647.1027; Found 647.1018.

Compound **4ak-anti** (24% yield, 23 mg) as white solid, mp: 253 - 255 °C. <sup>1</sup>H NMR (400 MHz, CDCl<sub>3</sub>) δ 7.67 (d, *J* = 7.9 Hz, 2H), 7.63 – 7.57 (m, 2H), 7.54 – 7.45 (m, 2H), 7.37 – 7.29 (m, 2H), 4.20 – 4.07 (m, 2H), 3.88 – 3.74 (m, 2H), 3.56 – 3.41 (m, 2H), 2.93 – 2.75 (m, 2H), 2.34 – 1.96 (m, 6H). <sup>13</sup>C NMR (100 MHz, CDCl<sub>3</sub>) δ 162.24 (d, *J* = 251.7 Hz), 160.63, 140.38 (d, *J* = 6.9 Hz), 130.90 (d, *J* = 7.7 Hz), 126.37 (q, *J* = 277.7 Hz), 123.20 (d, *J* = 3.4 Hz), 121.08 (d, *J* = 21.2 Hz), 115.20 (d, *J* = 24.9 Hz), 48.34, 35.44 (q, *J* = 3.0 Hz), 33.14 (q, *J* = 28.4 Hz), 24.56. <sup>19</sup>F NMR (376 MHz, CDCl<sub>3</sub>) δ -62.65 (t, *J* = 10.9 Hz), -109.38 – -109.52 (m). HRMS (ESI) *m/z*: [M + H]<sup>+</sup> Calcd for C<sub>24</sub>H<sub>22</sub>F<sub>8</sub>N<sub>4</sub>O<sub>4</sub>S<sub>2</sub> 647.1027; Found 647.1019.

### 3. One pot method for preparation of products 5aa

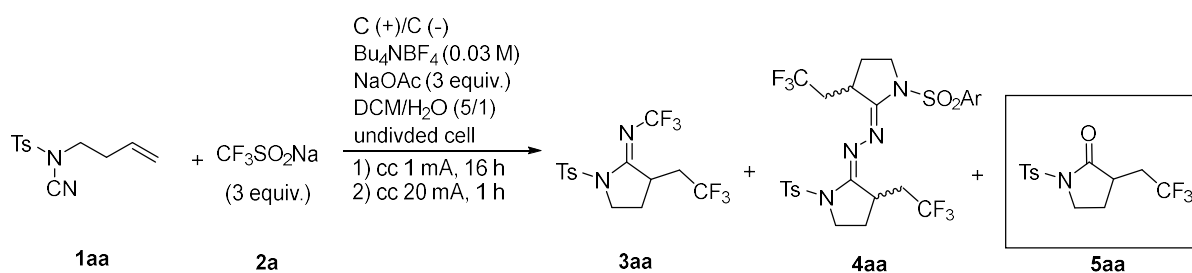

In an undivided three necked-flask (25 mL) equipped with a stir bar, a mixture of **1aa** (0.3 mmol, 75 mg), CF<sub>3</sub>SO<sub>2</sub>Na **2a** (0.9 mmol), Bu<sub>4</sub>NBF<sub>4</sub> (0.3 mmol), NaOAc (0.9 mmol) and DCM/H<sub>2</sub>O (v/v = 5/1, 10 mL) were added. The cell was equipped with two graphite rod (Φ 6 mm) electrodes and connected to a DC regulated power supply. The reaction mixture was stirred and electrolyzed at a constant current of 1 mA at 30 °C for 16 h. Then, the reaction mixture was stirred and electrolyzed at a constant current of 20 mA at 30 °C for 1 h. Upon completion, 5 mL H<sub>2</sub>O was added, the mixture was extracted with DCM (8 mL × 3). The combined organic layer was washed with brine, dried over Na<sub>2</sub>SO<sub>4</sub>, filtered, and concentrated *in vacuo*. The residue was purified by column chromatography (silica gel, EtOAc/Petroleum ether (60-90 °C)) to provide the desired products **5aa** (42,4 mg, 44% yield), **3aa** (23.2 mg, 20% yield).

### 4. General procedure for preparation of products 12



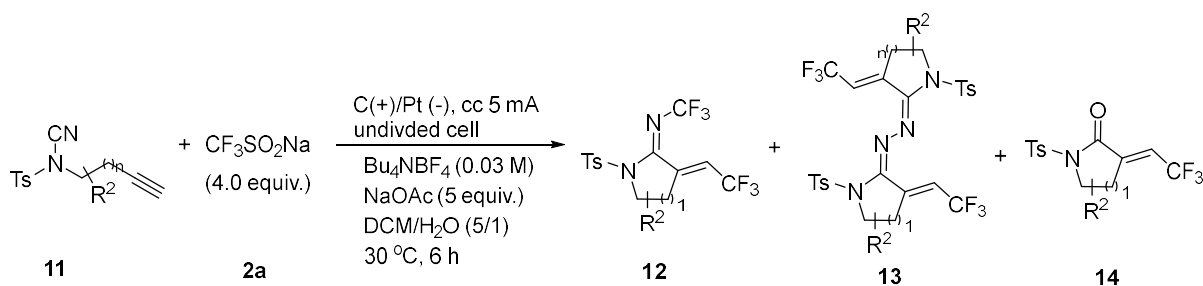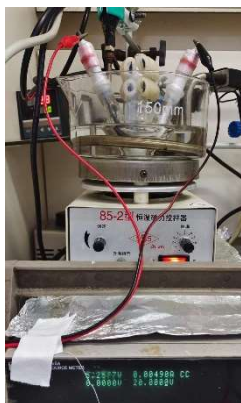

In an undivided three necked-flask (25 mL) equipped with a stir bar, a mixture of alkyne **11** (0.3 mmol),  $\text{CF}_3\text{SO}_2\text{Na}$  **2a** (1.2 mmol),  $\text{Bu}_4\text{NBF}_4$  (0.3 mmol), NaOAc (1.5 mmol) and DCM/ $\text{H}_2\text{O}$  (v/v = 5/1, 10 mL) were added. The cell was equipped with graphite rod ( $\Phi$  6 mm) as the anode and platinum plate (1 cm  $\times$  1 cm  $\times$  0.01 cm) as the cathode and connected to a DC regulated power supply. The reaction mixture was stirred and electrolyzed at a constant current of 5 mA at 30  $^\circ\text{C}$  for 6 h. Upon completion, 5 mL  $\text{H}_2\text{O}$  was added, the mixture was extracted with DCM (8 mL  $\times$  3). The combined organic layer was washed with brine, dried over  $\text{Na}_2\text{SO}_4$ , filtered, and concentrated *in vacuo*. The residue was purified by column chromatography (silica gel, EtOAc/Petroleum ether (60-90  $^\circ\text{C}$ )) to provide the desired products **12**.

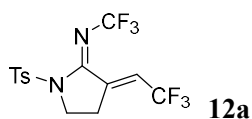

After stirring at 30  $^\circ\text{C}$  for 6 hours, the residue was purified by column chromatography (silica gel, EtOAc/Petroleum ether: 1/10) to afford the major isomer **12a** (*E*-(C=N), *E*-(C=C)) (38% yield, 44 mg) as white solid, mp: 131 - 133  $^\circ\text{C}$ .  $^1\text{H}$  NMR (500 MHz,  $\text{CDCl}_3$ )  $\delta$  7.94 (d,  $J$  = 8.4 Hz, 2H), 7.35 (d,  $J$  = 8.2 Hz, 2H), 6.63 – 6.56 (m, 1H), 4.05 (t,  $J$  = 6.9 Hz, 2H), 3.07 – 2.99 (m, 2H), 2.45 (s, 3H).  $^{13}\text{C}$  NMR (125 MHz,  $\text{CDCl}_3$ )  $\delta$  156.37 (q,  $J$  = 7.4 Hz), 146.15, 139.27 (q,  $J$  = 5.0 Hz), 133.64, 129.69, 129.53, 125.03 (qq,  $J$  = 36.5, 8.1 Hz), 122.34 (q,  $J$  = 256.5 Hz), 122.28 (q,  $J$  = 272.0 Hz), 45.88, 25.87, 21.86.  $^{19}\text{F}$  NMR (470 MHz,  $\text{CDCl}_3$ )  $\delta$  -49.13, -60.63 (dt,  $J$  = 7.7, 2.5 Hz). HRMS (ESI)  $m/z$ :  $[\text{M} + \text{H}]^+$  Calcd for  $\text{C}_{14}\text{H}_{13}\text{F}_6\text{N}_2\text{O}_2\text{S}$  387.0596; Found 387.0606.

Purified by column chromatography (silica gel, EtOAc/Petroleum ether: 1/5) to afford the minor isomer **12a** (*E*-(C=N), *Z*-(C=C)) (1% yield, 1 mg) as white solid, mp: 138 - 141  $^\circ\text{C}$ .  $^1\text{H}$  NMR (500 MHz,  $\text{CDCl}_3$ )  $\delta$  7.93 (d,  $J$  = 8.3 Hz, 2H), 7.34 (d,  $J$  = 8.1 Hz, 2H), 5.85 (q,  $J$  = 8.2 Hz, 1H), 3.93 (t,  $J$  = 6.4 Hz, 2H), 2.75 (t,  $J$  = 6.3 Hz, 2H), 2.45 (s, 3H).  $^{13}\text{C}$  NMR (125 MHz,  $\text{CDCl}_3$ )  $\delta$  153.14 (q,  $J$  = 8.0 Hz), 145.91, 138.54 (q,  $J$  = 5.0 Hz), 134.24, 129.65, 129.12, 121.83 (q,  $J$  = 255.9 Hz), 121.02 (q,  $J$  = 37.8 Hz), 120.24 (q,  $J$  = 270.7 Hz), 46.43, 33.41, 21.84.  $^{19}\text{F}$  NMR (470 MHz,  $\text{CDCl}_3$ )  $\delta$  -54.62 (q,  $J$  = 10.0 Hz), -62.56 (t,  $J$  = 9.4 Hz). HRMS (ESI)  $m/z$ :  $[\text{M} + \text{H}]^+$  Calcd for  $\text{C}_{14}\text{H}_{13}\text{F}_6\text{N}_2\text{O}_2\text{S}$  387.0596; Found 387.0600.

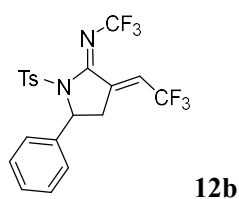

After stirring at 30 °C for 6 hours, the residue was purified by column chromatography (silica gel, EtOAc/Petroleum ether: 1/5) to afford the title compound (26% yield, 36 mg) as yellow solid, mp: 123 - 125 °C. <sup>1</sup>H NMR (400 MHz, CDCl<sub>3</sub>) δ 7.42 (d, *J* = 8.3 Hz, 2H), 7.38 – 7.31 (m, 3H), 7.20 – 7.08 (m, 4H), 6.81 – 6.65 (m, 1H), 5.60 (d, *J* = 8.9 Hz, 1H), 3.55 – 3.32 (m, 1H), 3.05 (d, *J* = 18.5 Hz, 1H), 2.39 (s, 3H). <sup>13</sup>C NMR (125 MHz, CDCl<sub>3</sub>) δ 156.40 (q, *J* = 7.3 Hz), 145.78, 139.61, 138.95 (q, *J* = 4.3 Hz), 133.71, 130.02, 129.28, 126.42, 125.58 (qq, *J* = 31.5, 5.0 Hz), 122.49 (q, *J* = 256.8 Hz), 122.19 (q, *J* = 272.7 Hz), 61.42, 36.12, 21.81. <sup>19</sup>F NMR (470 MHz, CDCl<sub>3</sub>) δ -48.95, -60.57 (dt, *J* = 7.3, 2.7 Hz). HRMS (ESI) *m/z*: [M + H]<sup>+</sup> Calcd for C<sub>20</sub>H<sub>17</sub>F<sub>6</sub>N<sub>2</sub>O<sub>2</sub>S 463.0909; Found 463.0918.

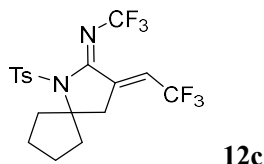

After stirring at 30 °C, 10 mA for 3 hours, the residue was purified by column chromatography (silica gel, EtOAc/Petroleum ether: 1/5) to afford the title compound (30% yield, 40 mg) as white solid, mp: 78 - 79 °C. <sup>1</sup>H NMR (400 MHz, CDCl<sub>3</sub>) δ 7.93 (d, *J* = 8.4 Hz, 2H), 7.32 (d, *J* = 8.2 Hz, 2H), 6.60 – 6.46 (m, 1H), 2.90 – 2.85 (m, 2H), 2.82 – 2.72 (m, 2H), 2.45 (s, 3H), 2.09 – 1.98 (m, 2H), 1.80 – 1.65 (m, 4H). <sup>13</sup>C NMR (125 MHz, CDCl<sub>3</sub>) δ 157.73 (q, *J* = 7.5 Hz), 145.48, 138.28 (q, *J* = 5.0 Hz), 135.26, 129.95, 129.19, 123.89 (qq, *J* = 30.9, 3.8 Hz), 122.36 (q, *J* = 257.2 Hz), 122.30 (q, *J* = 271.2 Hz), 74.92, 44.07, 38.12, 24.48, 21.82. <sup>19</sup>F NMR (470 MHz, CDCl<sub>3</sub>) δ -49.12, -59.78 (dt, *J* = 7.5, 2.6 Hz). HRMS (ESI) *m/z*: [M + H]<sup>+</sup> Calcd for C<sub>18</sub>H<sub>19</sub>F<sub>6</sub>N<sub>2</sub>O<sub>2</sub>S 441.1066; Found 441.1073.

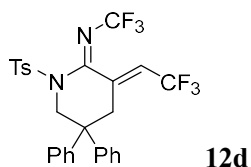

After stirring at 30 °C for 6 hours, the residue was purified by column chromatography (silica gel, DCM/Petroleum ether: 1/1) to afford the title compound (6% yield, 10 mg) as white solid, mp: 130 - 133 °C. <sup>1</sup>H NMR (400 MHz, CDCl<sub>3</sub>) δ 7.38 (d, *J* = 8.4 Hz, 2H), 7.29 – 7.15 (m, 6H), 7.13 – 6.98 (m, 6H), 6.32 – 6.12 (m, 1H), 4.60 (s, 2H), 3.48 – 3.39 (m, 2H), 2.38 (s, 3H). <sup>13</sup>C NMR (125 MHz, CDCl<sub>3</sub>) δ 158.67 (q, *J* = 7.8 Hz), 144.87, 144.47, 139.78 (q, *J* = 3.8 Hz), 134.45, 129.64, 129.02, 127.42, 126.95, 125.02 (q, *J* = 35.4 Hz), 122.54 (q, *J* = 256.6 Hz), 121.91 (q, *J* = 273.0 Hz), 54.34, 47.61, 37.59, 21.78. <sup>19</sup>F NMR (470 MHz, CDCl<sub>3</sub>) δ -48.09, -59.01 (dt, *J* = 7.8, 2.4 Hz). HRMS (ESI) *m/z*: [M + H]<sup>+</sup> Calcd for C<sub>27</sub>H<sub>23</sub>F<sub>6</sub>N<sub>2</sub>O<sub>2</sub>S 553.1379; Found 553.1373.

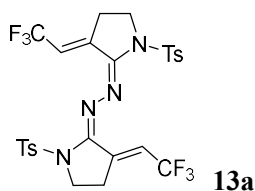

After stirring at 30 °C for 6 hours, the residue was purified by column chromatography (silica gel, EtOAc/Petroleum ether: 1/5) to afford the title compound (2% yield, 4 mg) as yellow solid, mp: 208 - 211 °C. <sup>1</sup>H NMR (500 MHz, CDCl<sub>3</sub>) δ 8.16 – 8.09 (m, 2H), 7.74 (d, *J* = 8.2 Hz, 4H), 7.23 (d, *J* = 8.1 Hz, 4H), 3.96 (t, *J* = 7.3 Hz, 4H), 3.00 – 2.93 (m, 4H), 2.42 (s, 6H). <sup>13</sup>C NMR (125 MHz, CDCl<sub>3</sub>) δ 151.17, 144.87, 137.00 (q, *J* = 5.0 Hz), 135.15, 129.67, 127.82, 126.73 (q, *J* = 34.4 Hz), 123.36 (q, *J* = 272.4 Hz), 47.02, 25.64, 21.78. <sup>19</sup>F NMR (470 MHz, CDCl<sub>3</sub>) δ -60.35 (dt, *J* = 8.5, 2.4 Hz). HRMS (ESI) *m/z*: [M + H]<sup>+</sup> Calcd for C<sub>26</sub>H<sub>25</sub>F<sub>6</sub>N<sub>4</sub>O<sub>4</sub>S<sub>2</sub> 635.1216; Found 635.1220.

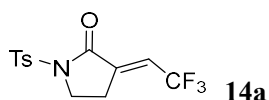

After stirring at 30 °C for 6 hours, the residue was purified by column chromatography (silica gel, EtOAc/Petroleum ether: 1/9) to afford the title compound (8% yield, 8 mg) as white solid, mp: 156 - 158 °C. <sup>1</sup>H NMR (500 MHz, CDCl<sub>3</sub>) δ 7.96 (d, *J* = 8.3 Hz, 2H), 7.36 (d, *J* = 8.1 Hz, 2H), 6.56 – 6.45 (m, 1H), 3.96 (t, *J* = 6.9 Hz, 2H), 3.06 – 2.98 (m, 2H), 2.44 (s, 3H). <sup>13</sup>C NMR (125 MHz, CDCl<sub>3</sub>) δ 164.12, 146.07, 140.31 (q, *J* = 5.0 Hz), 134.41, 129.99, 128.49, 122.75 (q, *J* = 271.3 Hz), 121.62 (q, *J* = 36.1 Hz), 43.99, 22.50, 21.83. <sup>19</sup>F NMR (470 MHz, CDCl<sub>3</sub>) δ -61.38 (dt, *J* = 7.3, 3.3 Hz). HRMS (ESI) *m/z*: [M + H]<sup>+</sup> Calcd for C<sub>13</sub>H<sub>13</sub>F<sub>3</sub>NO<sub>3</sub>S 320.0563; Found 320.0571.

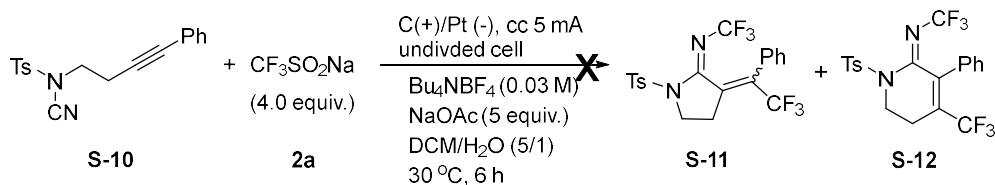

**Scheme S1.** Unsuccessful cyanamide bearing internal alkyne moiety

## V. Scale-up Experiment and Synthetic Transformations

### 1. Gram-Scale Experiment

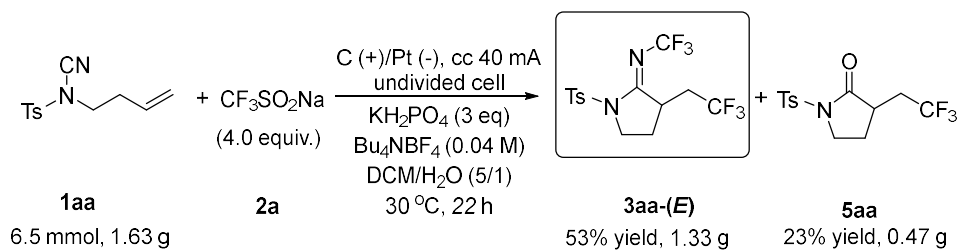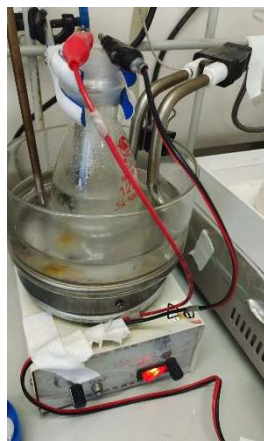

In an undivided cell (250 mL) equipped with a stir bar, a mixture of **1aa** (6.5 mmol, 1.63 g),  $\text{CF}_3\text{SO}_2\text{Na}$  **2a** (26 mmol, 4.1 g),  $\text{Bu}_4\text{NBF}_4$  (6.5 mmol, 2.14 g),  $\text{KH}_2\text{PO}_4$  (19.5 mmol, 2.65 g) and DCM/ $\text{H}_2\text{O}$  (v/v = 5/1, 162 mL) were added. The cell was equipped with graphite plate (2 cm × 2 cm × 0.1 cm) as the anode and platinum plate (2 cm × 2 cm × 0.02 cm) as the cathode and connected to a DC regulated power supply (the distance between the electrodes is about 10 mm). The reaction mixture was stirred and electrolyzed at a constant current of 40 mA at 30 °C for 22 h. When the reaction was finished, the mixture was extracted with DCM. The combined organic layer was washed with brine, dried over  $\text{Na}_2\text{SO}_4$ , filtered, and concentrated *in vacuo*. The residue was purified by column chromatography (silica gel, EtOAc/Petroleum ether (60 - 90 °C)) to provide the desired product **3aa** (53% yield, 1.33 g).

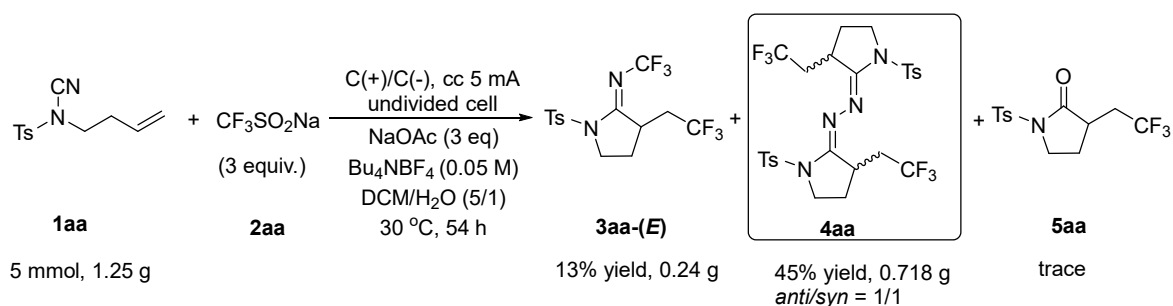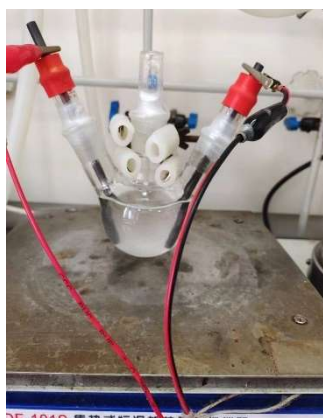

In an undivided cell (100 mL) equipped with a stir bar, a mixture of **1aa** (5 mmol, 1.25 g),  $\text{CF}_3\text{SO}_2\text{Na}$  **2a** (15 mmol, 2.46 g),  $\text{Bu}_4\text{NBF}_4$  (5 mmol, 1.65 g), NaOAc (15 mmol, 1.23 g) and DCM/ $\text{H}_2\text{O}$  (v/v = 5/1, 100 mL) were added. The cell was equipped with two graphite rod ( $\Phi$  6 mm) electrodes (the immersion length is 2 cm), and connected to a DC regulated power supply. The reaction mixture was stirred and electrolyzed at a constant current of 5 mA at 30 °C for 54 h. When the reaction was finished, the mixture was extracted with DCM. The combined organic layer was washed with brine, dried over  $\text{Na}_2\text{SO}_4$ , filtered, and concentrated *in vacuo*. The residue was purified by column chromatography (silica gel, EtOAc/Petroleum ether (60 - 90 °C)) to provide the desired product **4aa** (45% yield, 0.718 g, *anti/syn* = 1/1).

## 2. Transformations of the Product 3aa and 4aa

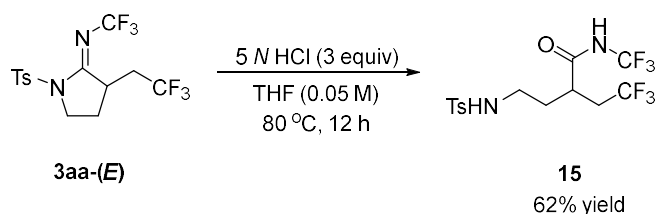

To solution of **3aa** (0.2 mmol, 77.7 mg) in THF (0.05 M, 4 mL) in a dried tube was added HCl (5 N, 0.12 mL) at room temperature, then the reaction mixture was warmed to 80 °C and allowed to proceed for 12 h. Upon completion, the mixture was cooled to room temperature and the solution was concentrated *in vacuo* to get the crude product. The crude product was washed with DCM (1 mL × 2) to afford the title compound **15** (62% yield, 50 mg) as white solid, mp: 149 - 151 °C. <sup>1</sup>H NMR (500 MHz, DMSO) δ 11.16 (s, 1H), 7.67 (d, *J* = 8.2 Hz, 2H), 7.61 (t, *J* = 5.8 Hz, 1H), 7.39 (d, *J* = 8.1 Hz, 2H), 2.78 – 2.65 (m, 3H), 2.60 – 2.52 (m, 1H), 2.48 – 2.39 (m, 1H), 2.38 (s, 3H), 1.74 – 1.56 (m, 2H). <sup>13</sup>C NMR (125 MHz, DMSO) δ 172.25, 142.74, 137.23, 129.65, 126.55, 126.51 (q, *J* = 277.1 Hz), 118.99 (q, *J* = 259.5 Hz), 39.85, 37.00, 34.09 (q, *J* = 27.8 Hz), 31.63, 20.92. <sup>19</sup>F NMR (470 MHz, DMSO) δ -56.26, -63.59 (t, *J* = 11.2 Hz). HRMS (ESI) *m/z*: [M + Na]<sup>+</sup> Calcd for C<sub>14</sub>H<sub>16</sub>F<sub>6</sub>N<sub>2</sub>NaO<sub>3</sub>S 429.0678; Found 429.0674.

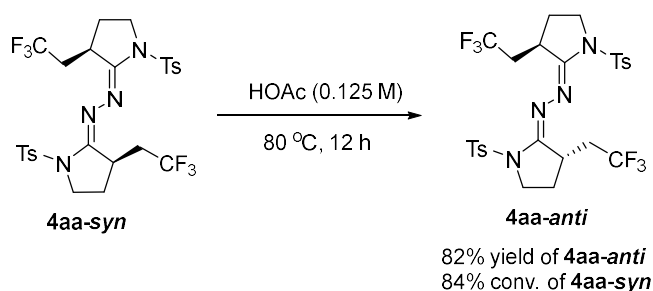

To a flame-dried sealed tube equipped with a magnetic stir bar were added **4aa-syn** (0.05 mmol, 1 equiv, 31.9 mg), HOAc (0.125 M, 0.1 mL). The tube was stirred at 80 °C for 12 h. Then the mixture was cooled to room temperature and the solvent was then removed *in vacuo*. Purification of the crude mixture by flash column chromatography (silica gel, EtOAc/Petroleum ether = 1: 3) afforded **4aa-anti** in 82% yield as a white solid.

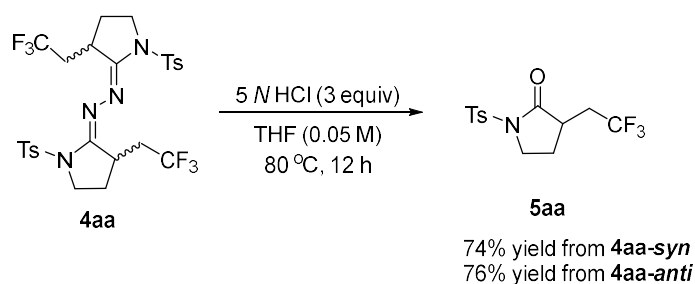

To solution of **4aa-syn or 4aa-anti** (0.1 mmol, 63.86 mg) in THF (0.05 M, 2 mL) in a dried tube was added HCl (5 N, 0.06 mL) at room temperature, then the reaction mixture was warmed to 80 °C and allowed to proceed for 12 h. Upon completion, the mixture was cooled to room temperature and the solution was concentrated *in vacuo*. Purification of the crude mixture by flash column chromatography (silica gel, EtOAc/Petroleum ether = 1: 5) afforded **5aa** in 74% - 76% yield as a white solid.

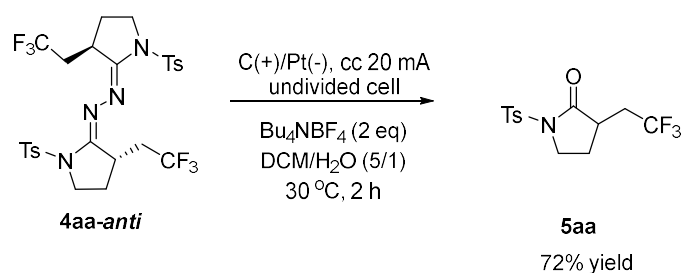

In an undivided three necked-flask (25 mL) equipped with a stir bar, a mixture of **4aa-anti** (0.1 mmol, 63.8 mg),  $\text{Bu}_4\text{NBF}_4$  (0.2 mmol, 2 equiv, 66 mg) and  $\text{DCM}/\text{H}_2\text{O}$  ( $v/v = 5/1$ , 6.6 mL) were added. The cell was equipped with graphite rod ( $\Phi$  6 mm) as the anode and platinum plate ( $1 \text{ cm} \times 1 \text{ cm} \times 0.01 \text{ cm}$ ) as the cathode and connected to a DC regulated power supply. The reaction mixture was stirred and electrolyzed at a constant current of 20 mA at  $30^\circ\text{C}$  for 2 h. Upon completion, the solution was concentrated *in vacuo*. Purification of the crude mixture by flash column chromatography (silica gel,  $\text{EtOAc}/\text{Petroleum ether} = 1:5$ ) afforded **5aa** (72% yield, 46 mg) as a white solid.

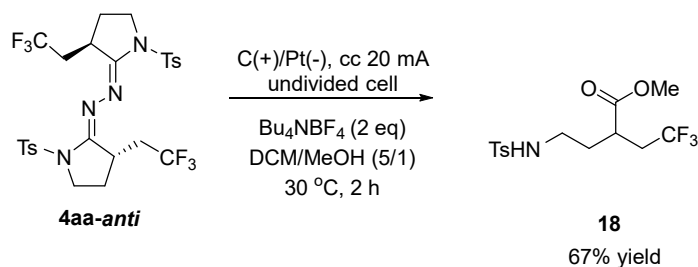

In a flame-dried undivided three necked-flask (25 mL) equipped with a stir bar, a mixture of **4aa-anti** (0.1 mmol, 63.8 mg),  $\text{Bu}_4\text{NBF}_4$  (0.2 mmol, 2 equiv, 66 mg) and  $\text{DCM}/\text{MeOH}$  ( $v/v = 5/1$ , 6.6 mL) were added. The cell was equipped with graphite rod ( $\Phi$  6 mm) as the anode and platinum plate ( $1 \text{ cm} \times 1 \text{ cm} \times 0.01 \text{ cm}$ ) as the cathode and connected to a DC regulated power supply. The reaction mixture was stirred and electrolyzed at a constant current of 20 mA at  $30^\circ\text{C}$  for 2 h. Upon completion, the solution was concentrated *in vacuo*. Purification of the crude mixture by flash column chromatography (silica gel,  $\text{EtOAc}/\text{Petroleum ether} = 1:3$ ) afforded **18** (67% yield, 47 mg) as colorless oil.  $^1\text{H}$  NMR (400 MHz,  $\text{CDCl}_3$ )  $\delta$  7.72 (d,  $J = 8.1 \text{ Hz}$ , 2H), 7.30 (d,  $J = 8.0 \text{ Hz}$ , 2H), 5.07 (t,  $J = 6.3 \text{ Hz}$ , 1H), 3.68 (s, 3H), 3.04 – 2.94 (m, 1H), 2.94 – 2.84 (m, 1H), 2.82 – 2.73 (m, 1H), 2.64 – 2.48 (m, 1H), 2.42 (s, 3H), 2.23 – 2.08 (m, 1H), 1.90 – 1.71 (m, 2H).  $^{13}\text{C}$  NMR (125 MHz,  $\text{CDCl}_3$ )  $\delta$  173.95, 143.78, 136.79, 129.92, 127.16, 126.06 (q,  $J = 277.2 \text{ Hz}$ ), 52.48, 40.75, 36.94, 35.79 (q,  $J = 29.0 \text{ Hz}$ ), 32.00, 21.60.  $^{19}\text{F}$  NMR (470 MHz,  $\text{CDCl}_3$ )  $\delta$  -65.04 (t,  $J = 10.6 \text{ Hz}$ ). HRMS (ESI)  $m/z$ :  $[\text{M} + \text{H}]^+$  Calcd for  $\text{C}_{14}\text{H}_{19}\text{F}_3\text{NO}_4\text{S}$  354.0981; Found 354.0987.

## VI. Control Experiments

### 1. Radical scavenger trapping

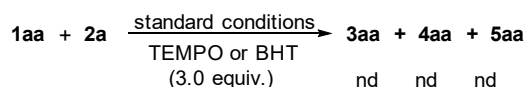

### Characterization of BHT-1a-CF<sub>3</sub> additive product S-3 by mass spectrometry

Reaction mixture was analyzed on a LC/MS (Agilent 1290 Infinity LC System connected to the Bruker micrOTOF-QII MS instrument). The high resolution mass spectrometry was performed to confirm the elemental compositions of BHT-1aa-CF<sub>3</sub> additive product **S-13**. **S-13**: HRMS (ESI) calculated for HRMS(ESI): calcd. for C<sub>28</sub>H<sub>38</sub>F<sub>3</sub>N<sub>2</sub>O<sub>3</sub>S ([M+H]<sup>+</sup>): 539.2550, found 539.2560. (Figure S1, a). The major product ions were observed in the fragmentation of protonated BHT additive product by CID mass spectra with argon as collision gas after isolation of the target precursor ion (Figure S1, b). The possible chemical structure of BHT additive product **S-13** and the major product ions observed in the fragmentation of its [M+H]<sup>+</sup> ion were given in Figure S1, c.

a)

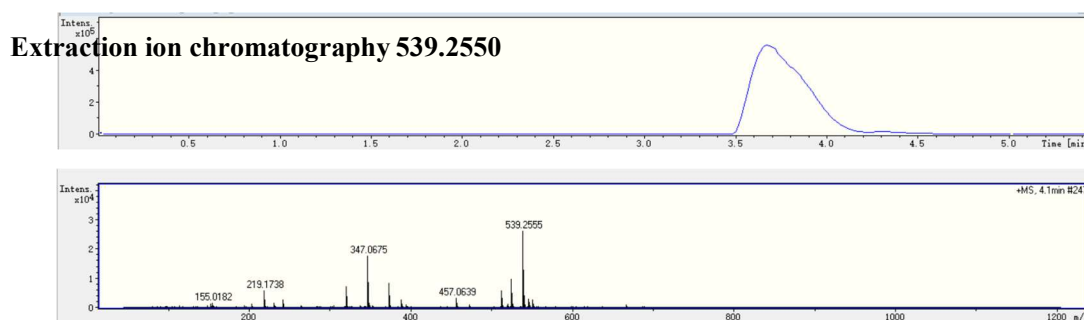

b)

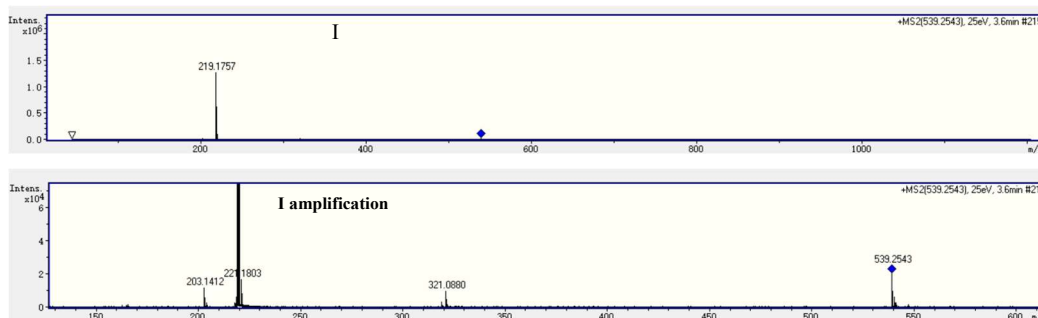

c)

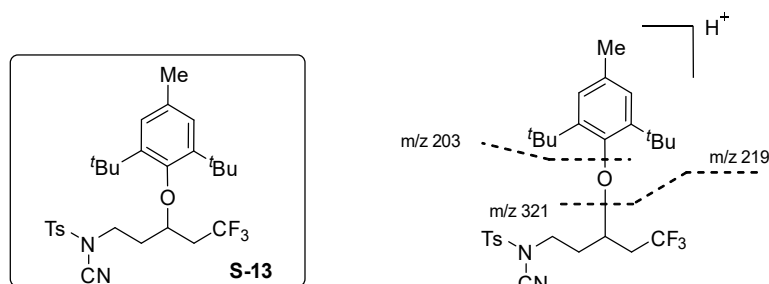

**S-13**: HRMS(ESI): calcd. for C<sub>28</sub>H<sub>38</sub>F<sub>3</sub>N<sub>2</sub>O<sub>3</sub>S ([M+H]<sup>+</sup>): 539.2550, found 539.2543.

**Figure S1.** a) High resolution mass spectra of BHT additive product **S-13** from reaction mixture by LC/MS. b) MS<sup>2</sup> mass spectra of

protonated BHT additive product **S-13**. c) The possible chemical structure of BHT additive product **S-13** and the major product ions observed in the fragmentation of its  $[M+H]^+$  ion.

## 2. Effects of N-substituted group

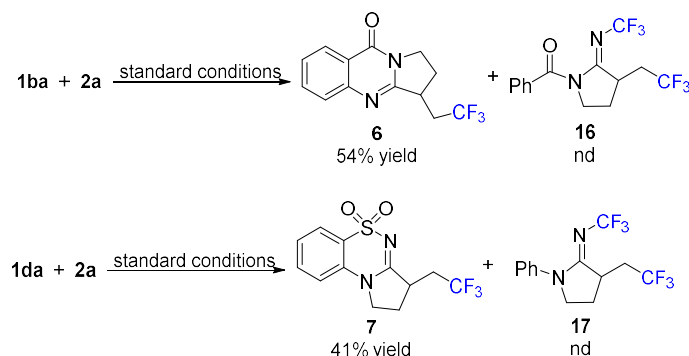

In an undivided three necked-flask (25 mL) equipped with a stir bar, a mixture of **1ba** (or **1da**) (0.3 mmol),  $CF_3SO_2Na$  **2a** (1.2 mmol),  $Bu_4NBF_4$  (0.3 mmol),  $KH_2PO_4$  (0.9 mmol) and DCM/ $H_2O$  (v/v = 5/1, 10 mL) were added. The cell was equipped with graphite rod ( $\Phi$  6 mm) as the anode and platinum plate (1 cm  $\times$  1 cm  $\times$  0.01 cm) as the cathode and connected to a DC regulated power supply. The reaction mixture was stirred and electrolyzed at a constant current of 20 mA at 30 °C for 2 h. Upon completion,  $H_2O$  (5 mL) was added, the mixture was extracted with DCM (8 mL  $\times$  3). The combined organic layer was washed with brine, dried over  $Na_2SO_4$ , filtered, and concentrated *in vacuo*. The residue was purified by column chromatography (silica gel, EtOAc/Petroleum ether (60-90 °C)) to provide the desired products **6** (or **7**).

## 3. Radical cross-coupling

### 3-1.

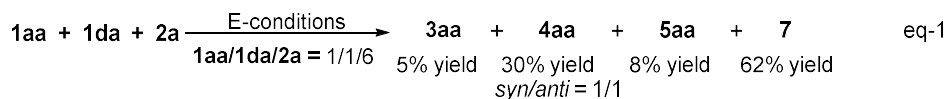

Conv of **1aa**: 74%, conv of **1da**: 76%

In an undivided three necked-flask (25 mL) equipped with a stir bar (eq-1), a mixture of **1aa** (0.15 mmol), **1da** (0.15 mmol),  $CF_3SO_2Na$  **2a** (0.9 mmol),  $Bu_4NBF_4$  (0.3 mmol), NaOAc (0.9 mmol) and DCM/ $H_2O$  (v/v = 5/1, 10 mL) were added. The cell was equipped with two graphite plate electrodes (0.8 cm  $\times$  1.5 cm  $\times$  0.2 cm). The reaction mixture was stirred and electrolyzed at a constant current of 1 mA at 30 °C for 16 h. Upon completion, 5 mL  $H_2O$  was added, the mixture was extracted with DCM (8 mL  $\times$  3). The combined organic layer was washed with brine, dried over  $Na_2SO_4$ , filtered, and concentrated *in vacuo*. The yields were determined by  $^{19}F$  NMR analysis using 1,3,5-trimethoxybenzene as the internal standard.



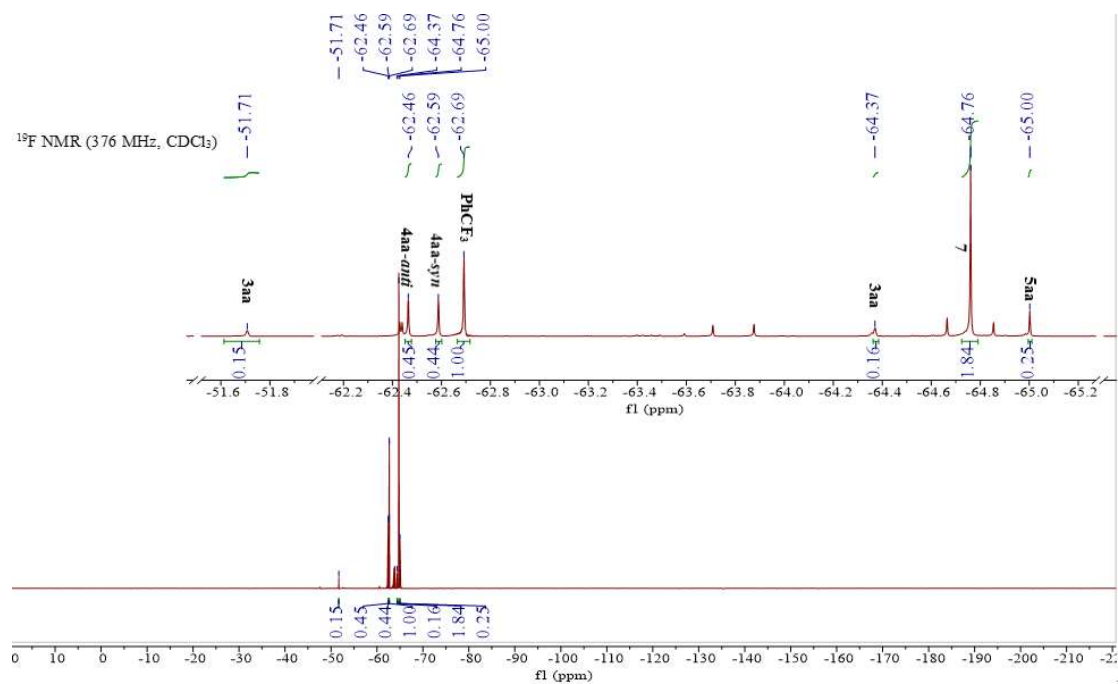

Figure S2. <sup>19</sup>F NMR analyses of the mixture (eq-1).

3-2.

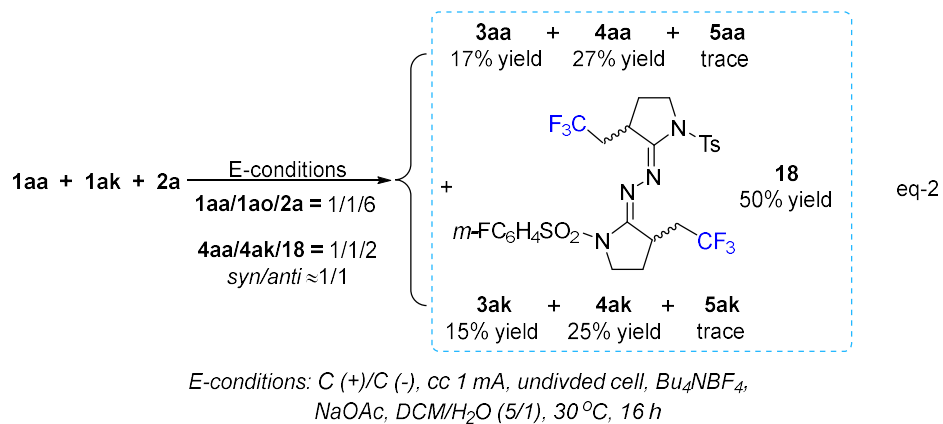

The procedure of eq-2 was similar to that of eq-1.

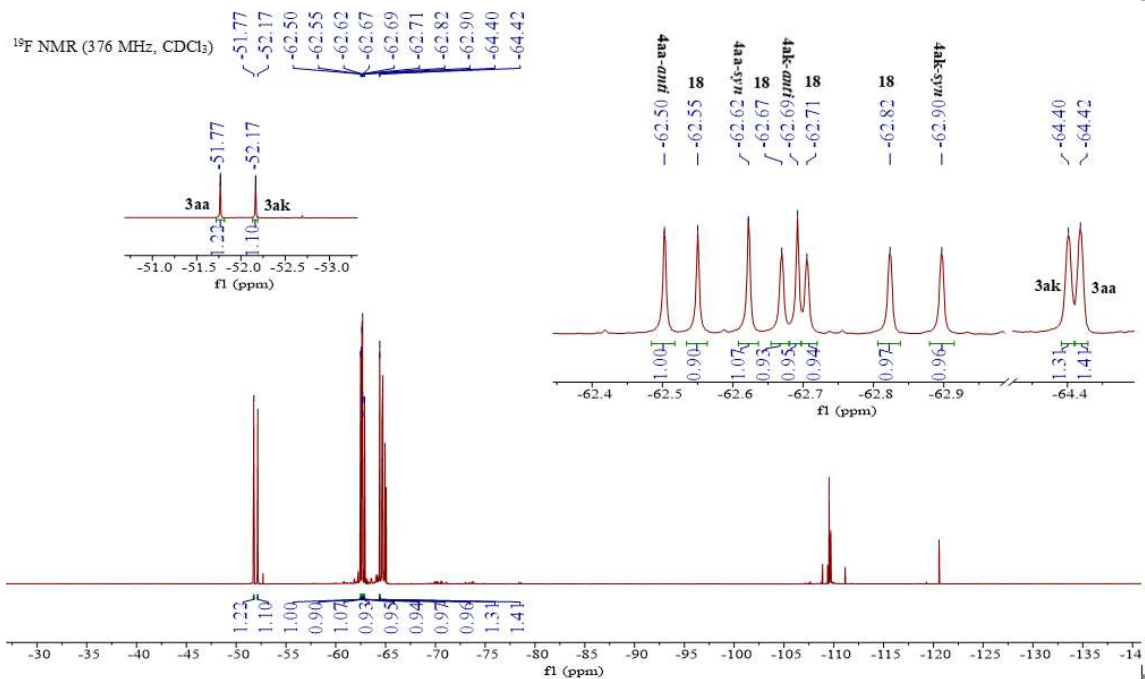

Figure S3.  $^{19}\text{F}$  NMR analyses of the mixture (eq-2).

a)

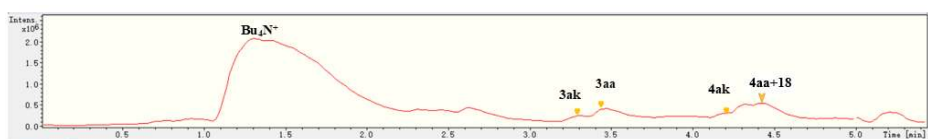

b)

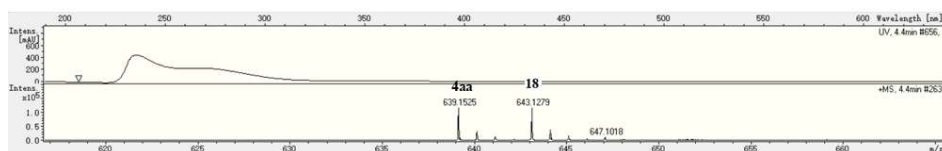

**4aa:** HRMS(ESI): calcd. for  $\text{C}_{26}\text{H}_{29}\text{F}_6\text{N}_4\text{O}_4\text{S}_2$  ( $[\text{M}+\text{H}]^+$ ): 639.1529, found 639.1525.

**18:** HRMS(ESI): calcd. for  $\text{C}_{25}\text{H}_{26}\text{F}_7\text{N}_4\text{O}_4\text{S}_2$  ( $[\text{M}+\text{H}]^+$ ): 643.1278, found 643.1279.

c)

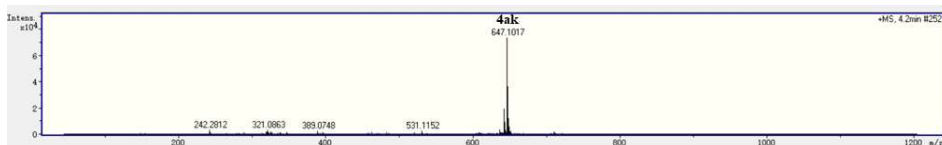

**4ak:** HRMS(ESI): calcd. for  $\text{C}_{24}\text{H}_{23}\text{F}_8\text{N}_4\text{O}_4\text{S}_2$  ( $[\text{M}+\text{H}]^+$ ): 647.1027, found 647.1017.

d)

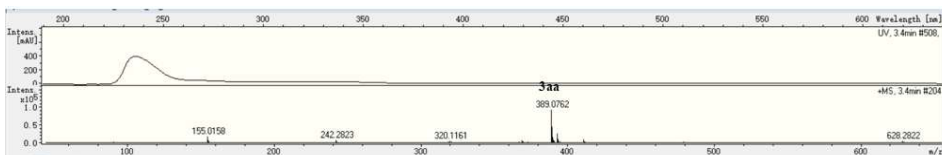

**3aa:** HRMS(ESI): calcd. for  $\text{C}_{14}\text{H}_{15}\text{F}_6\text{N}_2\text{O}_2\text{S}$  ( $[\text{M}+\text{H}]^+$ ): 389.0753, found 389.0762.

e)

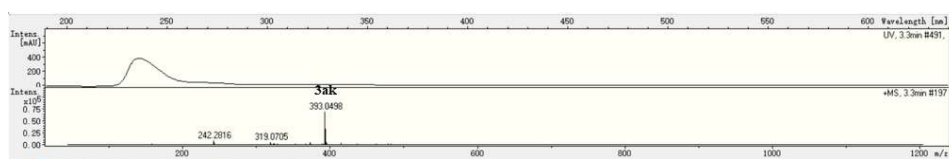

**3ak**: HRMS(ESI): calcd. for  $C_{13}H_{12}F_7N_2O_2S$  ( $[M+H]^+$ ): 393.0497, found 393.0498.

f)

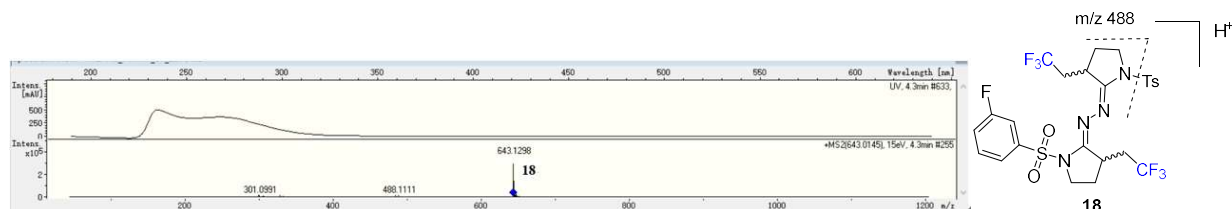

**Figure S4.** High-resolution mass analyses of the mixture (eq-2). a-e) The high-resolution mass analyses of **3aa**, **4aa**, **3ak**, **4ak** and **18** from reaction mixture by LC/MS. f) MS<sup>2</sup> mass spectra of protonated **18**.

#### 4. Electrochemical/ hydrolytic reaction

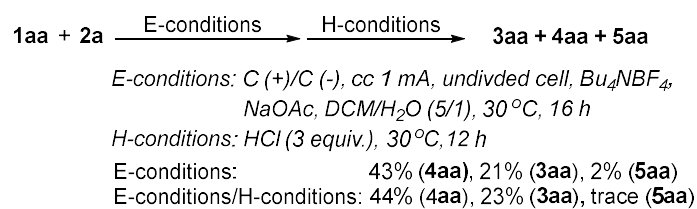

The formation of **5aa** was not observed when the resulting mixture of electrochemical process was subjected further to the hydrolytic reaction conditions at 30 °C.

#### 5. The <sup>18</sup>O deuterium label experiment

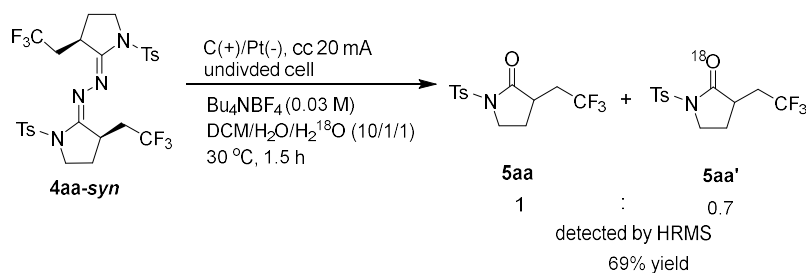

This result indicated that the oxygen atom of amide was derived from the solvent of water.

## VII. Cyclic Voltammetry (CV) Experiments

Cyclic voltammetry experiments were carried out in DY2113 potentiostat (Digi Ivy). Working electrode: glassy carbon, counter electrode: Pt wire, reference electrode: SCE.

a)

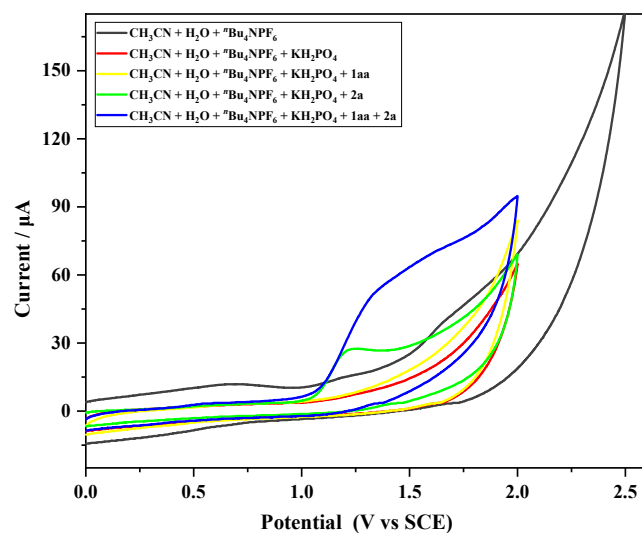

b)

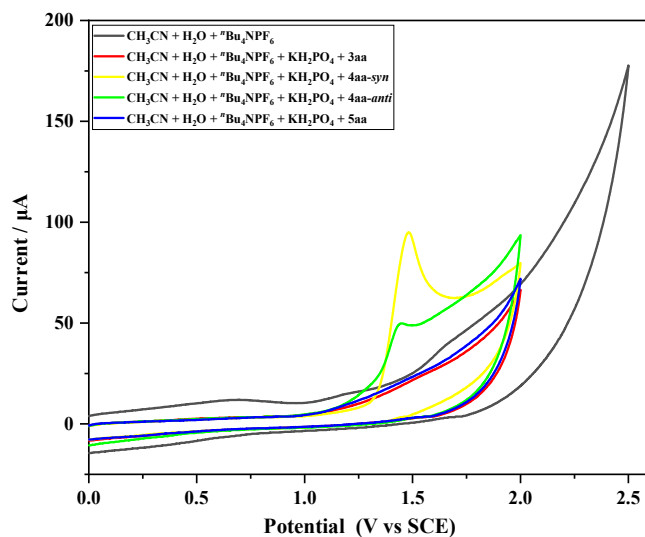

**Figure S5.** Cyclic voltammograms. **Black line:**  $t\text{Bu}_4\text{NPF}_6$  (0.1 M) and in 5 mL acetonitrile and 1 mL  $\text{H}_2\text{O}$  (background). a) **red line:**  $\text{KH}_2\text{PO}_4$  (0.006 M),  $t\text{Bu}_4\text{NPF}_6$  (0.1 M) and in 5 mL acetonitrile and 1 mL  $\text{H}_2\text{O}$ ; **yellow line:** **1aa** (0.002 M),  $t\text{Bu}_4\text{NPF}_6$  (0.1 M) and  $\text{KH}_2\text{PO}_4$  (0.006 M) in 5 mL acetonitrile and 1 mL  $\text{H}_2\text{O}$ ; **green line:** **2a** (0.002 M),  $t\text{Bu}_4\text{NPF}_6$  (0.1 M) and  $\text{KH}_2\text{PO}_4$  (0.006 M) in 5 mL acetonitrile and 1 mL  $\text{H}_2\text{O}$ , the oxidation peak of **2a**: 1.21 V; **blue line:** **1aa** (0.002 M), **2a** (0.008 M),  $t\text{Bu}_4\text{NPF}_6$  (0.1 M) and  $\text{KH}_2\text{PO}_4$  (0.006 M) in 5 mL acetonitrile and 1 mL  $\text{H}_2\text{O}$ , oxidation peak: 1.33 V.

b) **red line:** **3aa** (0.002 M),  $t\text{Bu}_4\text{NPF}_6$  (0.1 M) and  $\text{KH}_2\text{PO}_4$  (0.006 M) in 5 mL acetonitrile and 1 mL  $\text{H}_2\text{O}$ ; **yellow line:** **4aa-syn** (0.002 M),  $t\text{Bu}_4\text{NPF}_6$  (0.1 M) and  $\text{KH}_2\text{PO}_4$  (0.006 M) in 5 mL acetonitrile and 1 mL  $\text{H}_2\text{O}$ , oxidation peak: 1.50 V; **green line:** **4aa-anti** (0.002

M),  ${}^n\text{Bu}_4\text{NPF}_6$  (0.1 M) and  $\text{KH}_2\text{PO}_4$  (0.006 M) in 5 mL acetonitrile and 1 mL  $\text{H}_2\text{O}$ , oxidation peak: 1.44 V; **blue line: 5aa** (0.002 M),  ${}^n\text{Bu}_4\text{NPF}_6$  (0.1 M) and  $\text{KH}_2\text{PO}_4$  (0.006 M) in 5 mL acetonitrile and 1 mL  $\text{H}_2\text{O}$ . Scan rate: 50 mV/s.

In Figure S5, the voltammogram disclosed that no oxidative peaks were observed for compounds **1aa**, **3aa** and **5aa** in the potential window of interest. The anodic oxidation of the **2a**, followed by an irreversible reaction, occurred at a potential of ca. 1.21 V (*vs.* SCE) (the oxidation peak of **2a**: 1.4 V *vs.* Ag/AgCl in acetonitrile<sup>12</sup>), which may account for the oxidative generation of  $\text{CF}_3$  radical. Besides, azine **4aa** also showed distinct oxidation peaks at 1.50 V (*syn*) and 1.44 V (*anti*) (*vs.* SCE) which were high than that of **2a**.

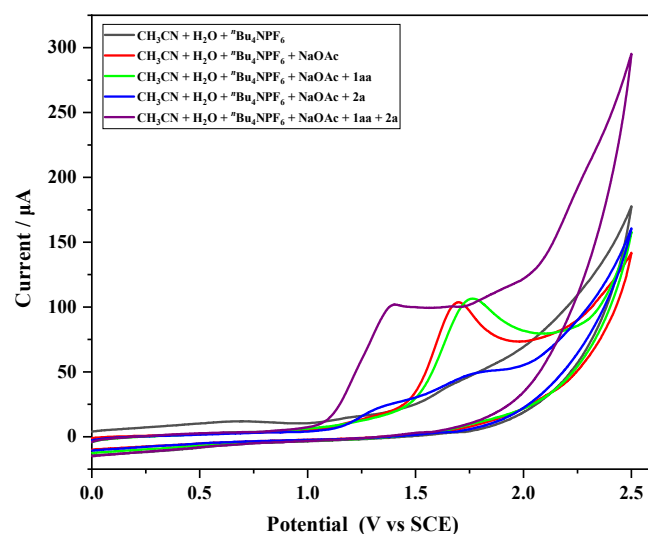

**Figure S6.** Cyclic voltammograms. **Black line:**  ${}^n\text{Bu}_4\text{NPF}_6$  (0.1 M) in 5 mL acetonitrile and 1 mL  $\text{H}_2\text{O}$  (background); **red line:** NaOAc (0.006 M),  ${}^n\text{Bu}_4\text{NPF}_6$  (0.1 M) in 5 mL acetonitrile and 1 mL  $\text{H}_2\text{O}$ , the oxidation peak of NaOAc: 1.69 V; **green line:** **1aa** (0.002 M),  ${}^n\text{Bu}_4\text{NPF}_6$  (0.1 M) and NaOAc (0.006 M) in 5 mL acetonitrile and 1 mL  $\text{H}_2\text{O}$ , the oxidation peak of NaOAc: 1.75 V; **blue line:** **2a** (0.002 M),  ${}^n\text{Bu}_4\text{NPF}_6$  (0.1 M) and NaOAc (0.006 M) in 5 mL acetonitrile and 1 mL  $\text{H}_2\text{O}$ , oxidation peak: 1.31, 1.76 V (NaOAc); **blue line:** **1aa** (0.002 M), **2a** (0.006 M),  ${}^n\text{Bu}_4\text{NPF}_6$  (0.1 M) and NaOAc (0.006 M) in 5 mL acetonitrile and 1 mL  $\text{H}_2\text{O}$ , oxidation peak: 1.39 V; Scan rate: 50 mV/s.

In the presence of NaOAc (0.006 M) (Figure S6), the anodic oxidation of the **2a** occurred at a potential of ca. 1.31 V (*vs.* SCE). The oxidation peak of NaOAc was assigned to 1.69 V (TBAOAc: 1.78 V *vs.* Ag/AgCl in acetonitrile<sup>13</sup>).

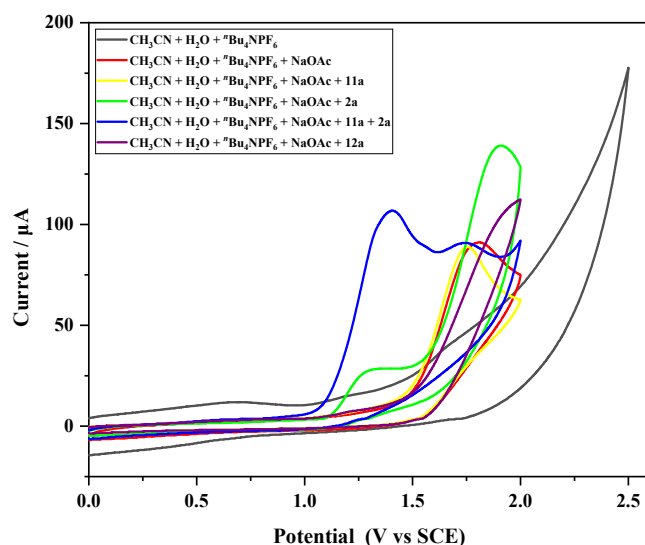

**Figure S7.** Cyclic voltammograms. **Black line:**  $t\text{Bu}_4\text{NPF}_6$  (0.1 M) in 5 mL acetonitrile and 1 mL  $\text{H}_2\text{O}$  (background); **red line:** NaOAc (0.01 M),  $t\text{Bu}_4\text{NPF}_6$  (0.1 M) in 5 mL acetonitrile and 1 mL  $\text{H}_2\text{O}$ , the oxidation peak of NaOAc: 1.80 V; **yellow line:** **11a** (0.002 M),  $t\text{Bu}_4\text{NPF}_6$  (0.1 M) and NaOAc (0.01 M) in 5 mL acetonitrile and 1 mL  $\text{H}_2\text{O}$ ; **green line:** **2a** (0.002 M),  $t\text{Bu}_4\text{NPF}_6$  (0.1 M) and NaOAc (0.01 M) in 5 mL acetonitrile and 1 mL  $\text{H}_2\text{O}$ , the oxidation peak of **2a**: 1.28 V; **blue line:** **11a** (0.002 M), **2a** (0.008 M),  $t\text{Bu}_4\text{NPF}_6$  (0.1 M) and NaOAc (0.01 M) in 5 mL acetonitrile and 1 mL  $\text{H}_2\text{O}$ , oxidation peak: 1.40; **purple line:** **12a** (0.002 M),  $t\text{Bu}_4\text{NPF}_6$  (0.1 M) and NaOAc (0.01 M) in 5 mL acetonitrile and 1 mL  $\text{H}_2\text{O}$ ; Scan rate: 50 mV/s.

When **11a** was employed (Figure S7), the anodic oxidation of the **2a** occurred at a potential of 1.28 V (*vs* SCE) in the presence of NaOAc (0.01 M), while product **12a** didn't display any oxidative peak in the potential window of interest.

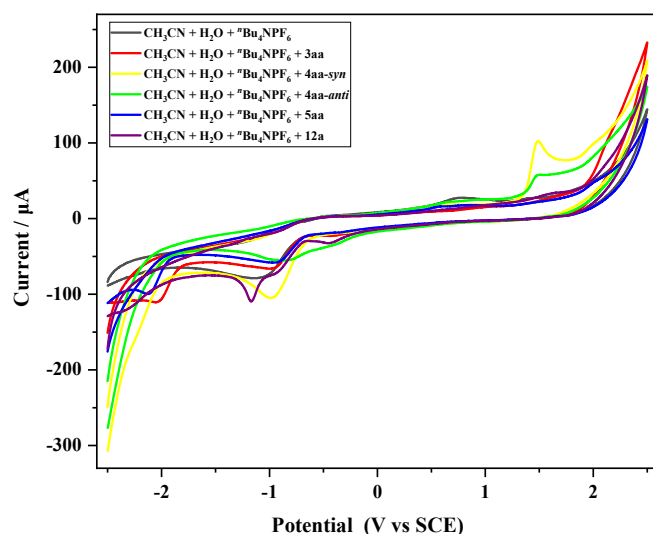

**Figure S8.** Cyclic voltammograms. **Black line:**  ${}^n\text{Bu}_4\text{NPF}_6$  (0.1 M) in 5 mL acetonitrile and 1 mL  $\text{H}_2\text{O}$  (background); **red line:** **3aa** (0.002 M),  ${}^n\text{Bu}_4\text{NPF}_6$  (0.1 M) in 5 mL acetonitrile and 1 mL  $\text{H}_2\text{O}$ , reduction peak: -2.05 V; **yellow line:** **4aa-syn** (0.002 M),  ${}^n\text{Bu}_4\text{NPF}_6$  (0.1 M) in 5 mL acetonitrile and 1 mL  $\text{H}_2\text{O}$ , oxidation peak: 1.49 V; **green line:** **4aa-anti** (0.002 M),  ${}^n\text{Bu}_4\text{NPF}_6$  (0.1 M) in 5 mL acetonitrile and 1 mL  $\text{H}_2\text{O}$ , oxidation peak: 1.48 V; **blue line:** **5aa** (0.002 M),  ${}^n\text{Bu}_4\text{NPF}_6$  (0.1 M) in 5 mL acetonitrile and 1 mL  $\text{H}_2\text{O}$ , reduction peak: -2.12 V; **purple line:** **12a** (0.002 M),  ${}^n\text{Bu}_4\text{NPF}_6$  (0.1 M) in 5 mL acetonitrile and 1 mL  $\text{H}_2\text{O}$ , reduction peak: -1.16, -2.42 V. Scan rate: 50 mV/s.

Further cyclic voltammetric (CV) experiments indicated that no reductive peaks of **4aa** can be observed, while compounds **3aa** and **5aa** demonstrated high reductive peaks at -2.05 V (vs SCE) and -2.12 V (vs SCE) respectively. In addition, the reductive peak of compound **12a** was observed at a potential of -1.16 V and -2.42 V (vs SCE) (Figure S8).

## VIII. DFT Calculations

All Density functional theory (DFT) calculations were carried out in the Gaussian 16 program suite<sup>14</sup> at the B3LYP level of theory with 6-311G(d,p) basis set.

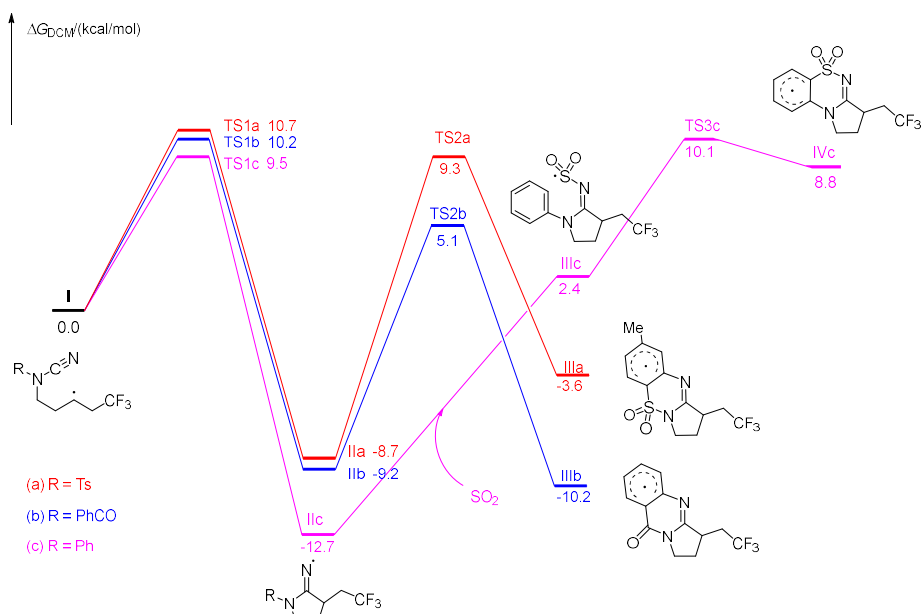

**Scheme S2.** DFT calculations.

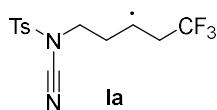

|                                          |                             |
|------------------------------------------|-----------------------------|
| Zero-point correction=                   | 0.255926 (Hartree/Particle) |
| Thermal correction to Energy=            | 0.277662                    |
| Thermal correction to Enthalpy=          | 0.278606                    |
| Thermal correction to Gibbs Free Energy= | 0.199371                    |

Sum of electronic and zero-point Energies= -1461.430948  
Sum of electronic and thermal Energies= -1461.409212  
Sum of electronic and thermal Enthalpies= -1461.408268  
Sum of electronic and thermal Free Energies= -1461.487503

---

| Center<br>Number | Atomic<br>Number | Forces (Hartrees/Bohr) |              |              |
|------------------|------------------|------------------------|--------------|--------------|
|                  |                  | X                      | Y            | Z            |
| 1                | 7                | -0.000001411           | -0.000006287 | -0.000017803 |
| 2                | 6                | -0.000005913           | 0.000000036  | 0.000004600  |
| 3                | 6                | -0.000000936           | 0.000000379  | -0.000000207 |
| 4                | 6                | 0.000001451            | 0.000001467  | 0.000002356  |
| 5                | 6                | 0.000000996            | 0.000002275  | 0.000004399  |
| 6                | 6                | 0.000007246            | 0.000006184  | -0.000003138 |
| 7                | 7                | 0.000003190            | 0.000004443  | -0.000008386 |
| 8                | 6                | 0.000004414            | 0.000001878  | -0.000001193 |
| 9                | 6                | -0.000002024           | -0.000002500 | -0.000006944 |
| 10               | 6                | 0.000000800            | -0.000003903 | -0.000004298 |
| 11               | 6                | 0.000000325            | 0.000001626  | 0.000000811  |
| 12               | 6                | -0.000003347           | -0.000001724 | 0.000000802  |
| 13               | 6                | -0.000000382           | -0.000005272 | 0.000002361  |
| 14               | 6                | -0.000000013           | -0.000000563 | 0.000000973  |
| 15               | 16               | 0.000003165            | 0.000002125  | -0.000013598 |
| 16               | 8                | -0.000006849           | -0.000011201 | -0.000006997 |
| 17               | 8                | 0.000002525            | 0.000000153  | 0.000007470  |
| 18               | 6                | 0.000001030            | -0.000000847 | 0.000006724  |
| 19               | 9                | 0.000000106            | -0.000000102 | 0.000009868  |
| 20               | 9                | 0.000000983            | 0.000005883  | 0.000007383  |
| 21               | 9                | -0.000003454           | 0.000001101  | 0.000011377  |
| 22               | 1                | 0.000002579            | 0.000006374  | -0.000000003 |
| 23               | 1                | -0.000000354           | -0.000000395 | 0.000000740  |
| 24               | 1                | -0.000000904           | -0.000001396 | -0.000001213 |
| 25               | 1                | 0.000000067            | 0.000002086  | -0.000003936 |
| 26               | 1                | 0.000001583            | 0.000004280  | 0.000004197  |
| 27               | 1                | -0.000001785           | -0.000001867 | 0.000003560  |
| 28               | 1                | -0.000000056           | 0.000003429  | 0.000003735  |
| 29               | 1                | 0.000001037            | -0.000001025 | -0.000008344 |
| 30               | 1                | 0.000000950            | 0.000000598  | -0.000005821 |
| 31               | 1                | -0.000001597           | -0.000002560 | 0.000004444  |
| 32               | 1                | -0.000002117           | -0.000003953 | 0.000001782  |
| 33               | 1                | 0.000000721            | 0.000001758  | -0.000000202 |
| 34               | 1                | -0.000001332           | -0.000002689 | 0.000000533  |
| 35               | 1                | -0.000000694           | 0.000000208  | 0.000003968  |

---



**TS1a**

|                                              |                             |
|----------------------------------------------|-----------------------------|
| Zero-point correction=                       | 0.256848 (Hartree/Particle) |
| Thermal correction to Energy=                | 0.277244                    |
| Thermal correction to Enthalpy=              | 0.278188                    |
| Thermal correction to Gibbs Free Energy=     | 0.203282                    |
| Sum of electronic and zero-point Energies=   | -1461.416979                |
| Sum of electronic and thermal Energies=      | -1461.396583                |
| Sum of electronic and thermal Enthalpies=    | -1461.395639                |
| Sum of electronic and thermal Free Energies= | -1461.470545                |

---

| Center<br>Number | Atomic<br>Number | Forces (Hartrees/Bohr) |              |              |
|------------------|------------------|------------------------|--------------|--------------|
|                  |                  | X                      | Y            | Z            |
| 1                | 7                | -0.000000544           | -0.000000261 | 0.000000934  |
| 2                | 6                | 0.000001590            | 0.000000644  | -0.000000149 |
| 3                | 6                | 0.000000360            | -0.000000039 | -0.000001581 |
| 4                | 6                | -0.000000942           | -0.000000990 | -0.000001084 |
| 5                | 6                | -0.000001387           | 0.000001204  | 0.000000588  |
| 6                | 6                | 0.000000302            | -0.000000999 | -0.000003261 |
| 7                | 7                | 0.000002401            | 0.000002182  | 0.000000442  |
| 8                | 6                | 0.000000187            | 0.000000163  | 0.000002447  |
| 9                | 6                | -0.000001265           | -0.000000732 | 0.000002346  |
| 10               | 6                | -0.000000981           | -0.000000411 | 0.000002063  |
| 11               | 6                | 0.000000247            | 0.000000421  | 0.000001742  |
| 12               | 6                | 0.000001258            | 0.000001589  | 0.000001695  |
| 13               | 6                | 0.000001151            | 0.000001358  | 0.000002181  |
| 14               | 6                | 0.000000354            | 0.000000616  | 0.000001040  |
| 15               | 16               | 0.000000021            | 0.000000381  | 0.000003409  |
| 16               | 8                | -0.000001355           | -0.000001024 | 0.000003555  |
| 17               | 8                | 0.000000733            | 0.000001320  | 0.000003908  |
| 18               | 6                | -0.000000428           | -0.000000474 | -0.000004824 |
| 19               | 9                | 0.000000203            | -0.000000286 | -0.000006098 |
| 20               | 9                | -0.000000913           | -0.000001466 | -0.000004516 |
| 21               | 9                | 0.000001412            | 0.000000002  | -0.000005408 |
| 22               | 1                | 0.000000949            | 0.000000460  | -0.000001963 |
| 23               | 1                | -0.000001061           | -0.000000983 | -0.000000218 |
| 24               | 1                | -0.000001872           | -0.000002242 | -0.000001879 |
| 25               | 1                | -0.000001480           | -0.000001303 | -0.000000155 |
| 26               | 1                | -0.000001991           | -0.000001736 | 0.000001211  |
| 27               | 1                | 0.000001379            | 0.000000538  | -0.000003884 |
| 28               | 1                | -0.000000206           | -0.000001207 | -0.000004132 |
| 29               | 1                | -0.000001711           | -0.000001381 | 0.000002458  |
| 30               | 1                | -0.000001658           | -0.000001364 | 0.000001749  |

|    |   |              |              |             |
|----|---|--------------|--------------|-------------|
| 31 | 1 | 0.000002146  | 0.000002106  | 0.000001578 |
| 32 | 1 | 0.000001869  | 0.000002232  | 0.000002433 |
| 33 | 1 | -0.000000402 | -0.000000344 | 0.000000859 |
| 34 | 1 | 0.000000547  | 0.000000862  | 0.000002252 |
| 35 | 1 | 0.000001089  | 0.000001164  | 0.000000264 |

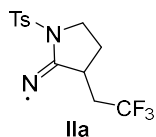

|                                              |                             |
|----------------------------------------------|-----------------------------|
| Zero-point correction=                       | 0.260405 (Hartree/Particle) |
| Thermal correction to Energy=                | 0.280343                    |
| Thermal correction to Enthalpy=              | 0.281288                    |
| Thermal correction to Gibbs Free Energy=     | 0.208020                    |
| Sum of electronic and zero-point Energies=   | -1461.448951                |
| Sum of electronic and thermal Energies=      | -1461.429013                |
| Sum of electronic and thermal Enthalpies=    | -1461.428068                |
| Sum of electronic and thermal Free Energies= | -1461.501336                |

| Center<br>Number | Atomic<br>Number | Forces (Hartrees/Bohr) |              |              |
|------------------|------------------|------------------------|--------------|--------------|
|                  |                  | X                      | Y            | Z            |
| 1                | 7                | -0.000000753           | -0.000000727 | -0.000001772 |
| 2                | 6                | 0.000000119            | -0.000000101 | -0.000002467 |
| 3                | 6                | -0.000000047           | -0.000001016 | -0.000001448 |
| 4                | 6                | -0.000001038           | 0.000000134  | -0.000003554 |
| 5                | 6                | -0.000001060           | 0.000000640  | -0.000002060 |
| 6                | 6                | 0.000000395            | -0.000000851 | -0.000001279 |
| 7                | 7                | 0.000000348            | -0.000002717 | -0.000000833 |
| 8                | 6                | -0.000000062           | 0.000000272  | 0.000000360  |
| 9                | 6                | -0.000000564           | 0.000001663  | 0.000000915  |
| 10               | 6                | -0.000000176           | 0.000001378  | 0.000002029  |
| 11               | 6                | 0.000000497            | 0.000000737  | 0.000003058  |
| 12               | 6                | 0.000000977            | -0.000000316 | 0.000002522  |
| 13               | 6                | 0.000000525            | -0.000000836 | 0.000001079  |
| 14               | 6                | 0.000000773            | 0.000001085  | 0.000005111  |
| 15               | 16               | -0.000000402           | 0.000000026  | -0.000001287 |
| 16               | 8                | -0.000001331           | 0.000001267  | -0.000002280 |
| 17               | 8                | 0.000000200            | -0.000000723 | -0.000002913 |
| 18               | 6                | 0.000000363            | -0.000000628 | -0.000000717 |
| 19               | 9                | 0.000000886            | -0.000001098 | 0.000000484  |
| 20               | 9                | -0.000000211           | -0.000000393 | -0.000001797 |

|    |   |              |              |              |
|----|---|--------------|--------------|--------------|
| 21 | 9 | 0.000001216  | -0.000002539 | -0.000001201 |
| 22 | 1 | 0.000000207  | -0.000001761 | -0.000002779 |
| 23 | 1 | -0.000000893 | 0.000000008  | -0.000003989 |
| 24 | 1 | -0.000000967 | 0.000000508  | -0.000002747 |
| 25 | 1 | -0.000000888 | 0.000001776  | -0.000001006 |
| 26 | 1 | -0.000001290 | 0.000001452  | -0.000002931 |
| 27 | 1 | 0.000001037  | -0.000001751 | -0.000000176 |
| 28 | 1 | -0.000000936 | -0.000000491 | 0.000000088  |
| 29 | 1 | -0.000000920 | 0.000002334  | 0.000000297  |
| 30 | 1 | -0.000000585 | 0.000002872  | 0.000002967  |
| 31 | 1 | 0.000001356  | -0.000001410 | 0.000002960  |
| 32 | 1 | 0.000000890  | -0.000001537 | 0.000000236  |
| 33 | 1 | 0.000000429  | 0.000001673  | 0.000004977  |
| 34 | 1 | 0.000000769  | 0.000000998  | 0.000004984  |
| 35 | 1 | 0.000001133  | 0.000000076  | 0.000005168  |

### TS2a

|                                              |                             |
|----------------------------------------------|-----------------------------|
| Zero-point correction=                       | 0.259811 (Hartree/Particle) |
| Thermal correction to Energy=                | 0.278760                    |
| Thermal correction to Enthalpy=              | 0.279705                    |
| Thermal correction to Gibbs Free Energy=     | 0.210271                    |
| Sum of electronic and zero-point Energies=   | -1461.423221                |
| Sum of electronic and thermal Energies=      | -1461.404271                |
| Sum of electronic and thermal Enthalpies=    | -1461.403327                |
| Sum of electronic and thermal Free Energies= | -1461.472760                |

| Center<br>Number | Atomic<br>Number | Forces (Hartrees/Bohr) |              |              |
|------------------|------------------|------------------------|--------------|--------------|
|                  |                  | X                      | Y            | Z            |
| 1                | 7                | 0.000002252            | -0.000000371 | -0.000000264 |
| 2                | 6                | 0.000000550            | -0.000000217 | -0.000000094 |
| 3                | 6                | 0.000000901            | -0.000002802 | 0.000000307  |
| 4                | 6                | 0.000002186            | -0.000002981 | -0.000000196 |
| 5                | 6                | 0.000003226            | -0.000002610 | -0.000000654 |
| 6                | 6                | -0.000000580           | -0.000002979 | -0.000000166 |
| 7                | 7                | -0.000000481           | 0.000000442  | 0.000000330  |
| 8                | 6                | 0.000000915            | 0.000002418  | -0.000000455 |
| 9                | 6                | 0.000000370            | 0.000002591  | -0.000000580 |
| 10               | 6                | -0.000001165           | 0.000003371  | 0.000000049  |
| 11               | 6                | -0.000002395           | 0.000003699  | -0.000000075 |
| 12               | 6                | -0.000001826           | 0.000003638  | 0.000000087  |
| 13               | 6                | -0.000000686           | 0.000002800  | -0.000000546 |

|    |    |              |              |              |
|----|----|--------------|--------------|--------------|
| 14 | 6  | -0.000004122 | 0.000004313  | 0.000000363  |
| 15 | 16 | 0.000003031  | 0.000001152  | -0.000001333 |
| 16 | 8  | 0.000003867  | 0.000001173  | -0.000001310 |
| 17 | 8  | 0.000003522  | 0.000002489  | -0.000001485 |
| 18 | 6  | -0.000000983 | -0.000005330 | 0.000001158  |
| 19 | 9  | -0.000002091 | -0.000005873 | 0.000001676  |
| 20 | 9  | 0.000000374  | -0.000006103 | 0.000001092  |
| 21 | 9  | -0.000002189 | -0.000005309 | 0.000001378  |
| 22 | 1  | -0.000000277 | -0.000002366 | 0.000000506  |
| 23 | 1  | 0.000002798  | -0.000002850 | -0.000000359 |
| 24 | 1  | 0.000002679  | -0.000004520 | 0.000000064  |
| 25 | 1  | 0.000003357  | -0.000002499 | -0.000000597 |
| 26 | 1  | 0.000004478  | -0.000001740 | -0.000001056 |
| 27 | 1  | -0.000001604 | -0.000002732 | 0.000000960  |
| 28 | 1  | 0.000000502  | -0.000003394 | 0.000000884  |
| 29 | 1  | 0.000001248  | 0.000002185  | -0.000000785 |
| 30 | 1  | -0.000001608 | 0.000003308  | -0.000000136 |
| 31 | 1  | -0.000002802 | 0.000003864  | 0.000000163  |
| 32 | 1  | 0.000000250  | 0.000003295  | -0.000000591 |
| 33 | 1  | -0.000004801 | 0.000003494  | 0.000000811  |
| 34 | 1  | -0.000004058 | 0.000005559  | 0.000000270  |
| 35 | 1  | -0.000004840 | 0.000004885  | 0.000000586  |

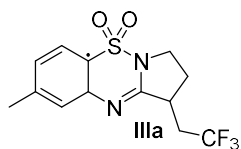

|                                              |                             |
|----------------------------------------------|-----------------------------|
| Zero-point correction=                       | 0.261250 (Hartree/Particle) |
| Thermal correction to Energy=                | 0.280313                    |
| Thermal correction to Enthalpy=              | 0.281257                    |
| Thermal correction to Gibbs Free Energy=     | 0.211106                    |
| Sum of electronic and zero-point Energies=   | -1461.443044                |
| Sum of electronic and thermal Energies=      | -1461.423981                |
| Sum of electronic and thermal Enthalpies=    | -1461.423037                |
| Sum of electronic and thermal Free Energies= | -1461.493188                |

| Center<br>Number | Atomic<br>Number | Forces (Hartrees/Bohr) |              |              |
|------------------|------------------|------------------------|--------------|--------------|
|                  |                  | X                      | Y            | Z            |
| 1                | 7                | -0.000000149           | -0.000000215 | -0.000001231 |
| 2                | 6                | 0.000000022            | 0.000000610  | -0.000000233 |
| 3                | 6                | 0.000000219            | 0.000000355  | 0.000000206  |
| 4                | 6                | -0.000000116           | 0.000000415  | -0.000000791 |

|    |    |              |              |              |
|----|----|--------------|--------------|--------------|
| 5  | 6  | 0.000000144  | 0.000000161  | -0.000001414 |
| 6  | 6  | -0.000000446 | 0.000000404  | 0.000000296  |
| 7  | 7  | -0.000000255 | 0.000000324  | 0.000000102  |
| 8  | 6  | 0.000000065  | -0.000000870 | -0.000000411 |
| 9  | 6  | -0.000000192 | -0.000000935 | -0.000000488 |
| 10 | 6  | 0.000000281  | -0.000000632 | 0.000000434  |
| 11 | 6  | 0.000000647  | -0.000000084 | 0.000001083  |
| 12 | 6  | -0.000000116 | 0.000000550  | 0.000000533  |
| 13 | 6  | -0.000000188 | 0.000000383  | 0.000000003  |
| 14 | 6  | 0.000000170  | -0.000000375 | 0.000001456  |
| 15 | 16 | 0.000000453  | 0.000000524  | -0.000001525 |
| 16 | 8  | -0.000000199 | -0.000000961 | -0.000001583 |
| 17 | 8  | -0.000000379 | 0.000000446  | -0.000001808 |
| 18 | 6  | 0.000000682  | -0.000000481 | 0.000001427  |
| 19 | 9  | 0.000000329  | -0.000000509 | 0.000001511  |
| 20 | 9  | -0.000000223 | 0.000000758  | -0.000000576 |
| 21 | 9  | -0.000000545 | 0.000001863  | 0.000000476  |
| 22 | 1  | -0.000000573 | 0.000001166  | 0.000000194  |
| 23 | 1  | -0.000000308 | 0.000001007  | -0.000001285 |
| 24 | 1  | -0.000000432 | 0.000000312  | -0.000000784 |
| 25 | 1  | -0.000000189 | -0.000000568 | -0.000001362 |
| 26 | 1  | -0.000000840 | -0.000000502 | -0.000001740 |
| 27 | 1  | 0.000000070  | -0.000000298 | 0.000001463  |
| 28 | 1  | 0.000000669  | -0.000000059 | 0.000000017  |
| 29 | 1  | -0.000000025 | -0.000001223 | -0.000000991 |
| 30 | 1  | 0.000000332  | -0.000001477 | 0.000000501  |
| 31 | 1  | 0.000000002  | 0.000000393  | 0.000001310  |
| 32 | 1  | -0.000000188 | 0.000000844  | -0.000000370 |
| 33 | 1  | 0.000000524  | -0.000000936 | 0.000001944  |
| 34 | 1  | 0.000000425  | -0.000000599 | 0.000001683  |
| 35 | 1  | 0.000000326  | 0.000000211  | 0.000001954  |

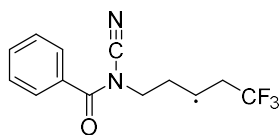

|                                            |                             |
|--------------------------------------------|-----------------------------|
| Zero-point correction=                     | 0.229066 (Hartree/Particle) |
| Thermal correction to Energy=              | 0.247298                    |
| Thermal correction to Enthalpy=            | 0.248243                    |
| Thermal correction to Gibbs Free Energy=   | 0.177516                    |
| Sum of electronic and zero-point Energies= | -986.868256                 |

Sum of electronic and thermal Energies= -986.850023  
 Sum of electronic and thermal Enthalpies= -986.849079  
 Sum of electronic and thermal Free Energies= -986.919805

| Center<br>Number | Atomic<br>Number | Forces (Hartrees/Bohr) |              |              |
|------------------|------------------|------------------------|--------------|--------------|
|                  |                  | X                      | Y            | Z            |
| 1                | 6                | 0.000019860            | -0.000012614 | -0.000016154 |
| 2                | 7                | -0.000016955           | 0.000013160  | 0.000011067  |
| 3                | 6                | 0.000004647            | -0.000008694 | 0.000002756  |
| 4                | 6                | 0.000001581            | -0.000005631 | -0.000006145 |
| 5                | 7                | 0.000003381            | -0.000000746 | -0.000003598 |
| 6                | 6                | -0.000016665           | 0.000005065  | 0.000003933  |
| 7                | 8                | -0.000016223           | 0.000002958  | 0.000005882  |
| 8                | 6                | 0.000001049            | 0.000004566  | 0.000002685  |
| 9                | 6                | -0.000007041           | 0.000004985  | 0.000001211  |
| 10               | 6                | 0.000010346            | -0.000001240 | 0.000000948  |
| 11               | 6                | 0.000007765            | 0.000000720  | 0.000000288  |
| 12               | 6                | 0.000010596            | -0.000010579 | -0.000003176 |
| 13               | 6                | 0.000005748            | 0.000007056  | -0.000004388 |
| 14               | 6                | 0.000004085            | -0.000001658 | 0.000004860  |
| 15               | 6                | 0.000009686            | 0.000007875  | 0.000004818  |
| 16               | 9                | -0.000002292           | -0.000007036 | -0.000006800 |
| 17               | 6                | -0.000003674           | -0.000002165 | 0.000007869  |
| 18               | 9                | 0.000000207            | 0.000001462  | 0.000000113  |
| 19               | 9                | -0.000004693           | 0.000004601  | -0.000001587 |
| 20               | 1                | -0.000003076           | 0.000006249  | -0.000000328 |
| 21               | 1                | -0.000001386           | 0.000002668  | 0.000003116  |
| 22               | 1                | 0.000000389            | -0.000000987 | 0.000001500  |
| 23               | 1                | 0.000001249            | 0.000000044  | 0.000001559  |
| 24               | 1                | -0.000000946           | 0.000000994  | -0.000000857 |
| 25               | 1                | -0.000000690           | -0.000001546 | 0.000000342  |
| 26               | 1                | 0.000001158            | 0.000001716  | 0.000000229  |
| 27               | 1                | -0.000000820           | -0.000001726 | -0.000001489 |
| 28               | 1                | -0.000002340           | -0.000000769 | -0.000000497 |
| 29               | 1                | 0.000001239            | -0.000000107 | 0.000000826  |
| 30               | 1                | -0.000002171           | -0.000003843 | -0.000002349 |
| 31               | 1                | -0.000004012           | -0.000004776 | -0.000006632 |

**TS1b**

Zero-point correction= 0.229593 (Hartree/Particle)  
 Thermal correction to Energy= 0.246525

Thermal correction to Enthalpy= 0.247470  
 Thermal correction to Gibbs Free Energy= 0.181062  
 Sum of electronic and zero-point Energies= -986.855017  
 Sum of electronic and thermal Energies= -986.838084  
 Sum of electronic and thermal Enthalpies= -986.837140  
 Sum of electronic and thermal Free Energies= -986.903548

---

| Center<br>Number | Atomic<br>Number | Forces (Hartrees/Bohr) |              |              |
|------------------|------------------|------------------------|--------------|--------------|
|                  |                  | X                      | Y            | Z            |
| 1                | 6                | -0.000001011           | 0.000000377  | -0.000003948 |
| 2                | 7                | 0.000000792            | -0.000000056 | -0.000000814 |
| 3                | 6                | -0.000001211           | -0.000000636 | -0.000001195 |
| 4                | 6                | 0.000000615            | 0.000001144  | 0.000000228  |
| 5                | 6                | -0.000000222           | 0.000001084  | -0.000003269 |
| 6                | 8                | -0.000000377           | 0.000000788  | -0.000005363 |
| 7                | 6                | -0.000001081           | -0.000000658 | -0.000002386 |
| 8                | 6                | -0.000000156           | 0.000000375  | -0.000002716 |
| 9                | 6                | 0.000000412            | 0.000001032  | -0.000003393 |
| 10               | 6                | 0.000000924            | 0.000002084  | -0.000005323 |
| 11               | 6                | 0.000000911            | 0.000001342  | -0.000004511 |
| 12               | 6                | -0.000000599           | -0.000001136 | 0.000001679  |
| 13               | 6                | 0.000001231            | 0.000000163  | 0.000002990  |
| 14               | 6                | -0.000000321           | -0.000001128 | 0.000005483  |
| 15               | 7                | 0.000001414            | 0.000000638  | 0.000001788  |
| 16               | 9                | 0.000001944            | -0.000000113 | 0.000006720  |
| 17               | 6                | 0.000000253            | -0.000001056 | 0.000006386  |
| 18               | 9                | 0.000000112            | -0.000002183 | 0.000008557  |
| 19               | 9                | -0.000001269           | -0.000001684 | 0.000005472  |
| 20               | 1                | -0.000001813           | -0.000001183 | -0.000002262 |
| 21               | 1                | 0.000000304            | 0.000000378  | -0.000001518 |
| 22               | 1                | -0.000001312           | -0.000001449 | -0.000000103 |
| 23               | 1                | -0.000001248           | -0.000000671 | -0.000001163 |
| 24               | 1                | 0.000000541            | 0.000001282  | -0.000004148 |
| 25               | 1                | 0.000001743            | 0.000002851  | -0.000006615 |
| 26               | 1                | 0.000001642            | 0.000002516  | -0.000006118 |
| 27               | 1                | -0.000001331           | -0.000001334 | 0.000001413  |
| 28               | 1                | -0.000002537           | -0.000002145 | 0.000001595  |
| 29               | 1                | 0.000001288            | 0.000000785  | 0.000002269  |
| 30               | 1                | -0.000000964           | -0.000001495 | 0.000005076  |
| 31               | 1                | 0.000001325            | 0.000000087  | 0.000005191  |

---

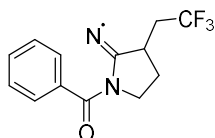

**llc**

|                                              |                             |
|----------------------------------------------|-----------------------------|
| Zero-point correction=                       | 0.233304 (Hartree/Particle) |
| Thermal correction to Energy=                | 0.249783                    |
| Thermal correction to Enthalpy=              | 0.250728                    |
| Thermal correction to Gibbs Free Energy=     | 0.186032                    |
| Sum of electronic and zero-point Energies=   | -986.887362                 |
| Sum of electronic and thermal Energies=      | -986.870882                 |
| Sum of electronic and thermal Enthalpies=    | -986.869938                 |
| Sum of electronic and thermal Free Energies= | -986.934634                 |

| Center<br>Number | Atomic<br>Number | Forces (Hartrees/Bohr) |              |              |
|------------------|------------------|------------------------|--------------|--------------|
|                  |                  | X                      | Y            | Z            |
| 1                | 6                | 0.000019602            | -0.000001496 | 0.000019662  |
| 2                | 7                | -0.000009466           | 0.000042981  | 0.000013651  |
| 3                | 6                | -0.000000353           | -0.000007302 | -0.000000723 |
| 4                | 6                | 0.000011130            | -0.000039791 | -0.000030150 |
| 5                | 6                | -0.000013553           | 0.000004889  | -0.000023176 |
| 6                | 8                | -0.000001822           | -0.000002330 | -0.000007589 |
| 7                | 6                | -0.000001418           | 0.000001032  | 0.000013233  |
| 8                | 6                | 0.000004473            | -0.000004641 | 0.000003196  |
| 9                | 6                | -0.000002054           | 0.000010414  | -0.000003977 |
| 10               | 6                | -0.000005993           | -0.000001525 | 0.000007953  |
| 11               | 6                | 0.000007340            | -0.000003566 | 0.000009493  |
| 12               | 6                | 0.000001558            | 0.000000753  | -0.000010180 |
| 13               | 6                | -0.000000704           | 0.000004404  | 0.000013324  |
| 14               | 6                | -0.000005768           | -0.000010097 | -0.000005564 |
| 15               | 7                | -0.000004242           | 0.000004405  | 0.000006478  |
| 16               | 9                | -0.000005440           | -0.000004646 | -0.000000245 |
| 17               | 6                | 0.000026448            | 0.000013113  | 0.000013128  |
| 18               | 9                | -0.000002342           | -0.000002448 | -0.000000871 |
| 19               | 9                | -0.000018590           | -0.000014794 | -0.000020179 |
| 20               | 1                | 0.000002800            | 0.000001980  | -0.000002338 |
| 21               | 1                | 0.000001665            | 0.000000125  | -0.000004084 |
| 22               | 1                | 0.000003101            | -0.000000611 | -0.000001605 |
| 23               | 1                | 0.000000281            | 0.000005468  | 0.000009371  |
| 24               | 1                | -0.000000887           | 0.000000414  | 0.000006872  |
| 25               | 1                | -0.000000447           | -0.000001144 | 0.000000919  |
| 26               | 1                | -0.000001761           | -0.000000211 | -0.000000945 |



|    |   |              |              |              |
|----|---|--------------|--------------|--------------|
| 27 | 1 | 0.000001296  | -0.000000339 | -0.000001832 |
| 28 | 1 | -0.000000807 | 0.000002731  | -0.000003669 |
| 29 | 1 | -0.000001977 | 0.000000201  | -0.000002335 |
| 30 | 1 | -0.000000317 | 0.000001212  | 0.000000567  |
| 31 | 1 | -0.000001754 | 0.000000820  | 0.000001616  |

**TS2b**

|                                              |                             |
|----------------------------------------------|-----------------------------|
| Zero-point correction=                       | 0.229593 (Hartree/Particle) |
| Thermal correction to Energy=                | 0.246525                    |
| Thermal correction to Enthalpy=              | 0.247470                    |
| Thermal correction to Gibbs Free Energy=     | 0.181062                    |
| Sum of electronic and zero-point Energies=   | -986.855017                 |
| Sum of electronic and thermal Energies=      | -986.838084                 |
| Sum of electronic and thermal Enthalpies=    | -986.837140                 |
| Sum of electronic and thermal Free Energies= | -986.903548                 |

| Center Number | Atomic Number | Forces (Hartrees/Bohr) |              |              |
|---------------|---------------|------------------------|--------------|--------------|
|               |               | X                      | Y            | Z            |
| 1             | 6             | -0.000001011           | 0.000000377  | -0.000003948 |
| 2             | 7             | 0.000000792            | -0.000000056 | -0.000000814 |
| 3             | 6             | -0.000001211           | -0.000000636 | -0.000001195 |
| 4             | 6             | 0.000000615            | 0.000001144  | 0.000000228  |
| 5             | 6             | -0.000000222           | 0.000001084  | -0.000003269 |
| 6             | 8             | -0.000000377           | 0.000000788  | -0.000005363 |
| 7             | 6             | -0.000001081           | -0.000000658 | -0.000002386 |
| 8             | 6             | -0.000000156           | 0.000000375  | -0.000002716 |
| 9             | 6             | 0.000000412            | 0.000001032  | -0.000003393 |
| 10            | 6             | 0.000000924            | 0.000002084  | -0.000005323 |
| 11            | 6             | 0.000000911            | 0.000001342  | -0.000004511 |
| 12            | 6             | -0.000000599           | -0.000001136 | 0.000001679  |
| 13            | 6             | 0.000001231            | 0.000000163  | 0.000002990  |
| 14            | 6             | -0.000000321           | -0.000001128 | 0.000005483  |
| 15            | 7             | 0.000001414            | 0.000000638  | 0.000001788  |
| 16            | 9             | 0.000001944            | -0.000000113 | 0.000006720  |
| 17            | 6             | 0.000000253            | -0.000001056 | 0.000006386  |
| 18            | 9             | 0.000000112            | -0.000002183 | 0.000008557  |
| 19            | 9             | -0.000001269           | -0.000001684 | 0.000005472  |
| 20            | 1             | -0.000001813           | -0.000001183 | -0.000002262 |
| 21            | 1             | 0.000000304            | 0.000000378  | -0.000001518 |
| 22            | 1             | -0.000001312           | -0.000001449 | -0.000000103 |
| 23            | 1             | -0.000001248           | -0.000000671 | -0.000001163 |
| 24            | 1             | 0.000000541            | 0.000001282  | -0.000004148 |

|    |   |              |              |              |
|----|---|--------------|--------------|--------------|
| 25 | 1 | 0.000001743  | 0.000002851  | -0.000006615 |
| 26 | 1 | 0.000001642  | 0.000002516  | -0.000006118 |
| 27 | 1 | -0.000001331 | -0.000001334 | 0.000001413  |
| 28 | 1 | -0.000002537 | -0.000002145 | 0.000001595  |
| 29 | 1 | 0.000001288  | 0.000000785  | 0.000002269  |
| 30 | 1 | -0.000000964 | -0.000001495 | 0.000005076  |
| 31 | 1 | 0.000001325  | 0.000000087  | 0.000005191  |

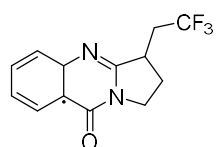

IIIb

|                                              |                             |
|----------------------------------------------|-----------------------------|
| Zero-point correction=                       | 0.234204 (Hartree/Particle) |
| Thermal correction to Energy=                | 0.249655                    |
| Thermal correction to Enthalpy=              | 0.250599                    |
| Thermal correction to Gibbs Free Energy=     | 0.189507                    |
| Sum of electronic and zero-point Energies=   | -986.891404                 |
| Sum of electronic and thermal Energies=      | -986.875954                 |
| Sum of electronic and thermal Enthalpies=    | -986.875010                 |
| Sum of electronic and thermal Free Energies= | -986.936101                 |

| Center<br>Number | Atomic<br>Number | Forces (Hartrees/Bohr) |              |              |
|------------------|------------------|------------------------|--------------|--------------|
|                  |                  | X                      | Y            | Z            |
| 1                | 6                | 0.000002780            | 0.000011511  | 0.000008331  |
| 2                | 7                | -0.000005322           | -0.000008028 | 0.000003821  |
| 3                | 6                | 0.000006526            | -0.000001569 | 0.000002125  |
| 4                | 6                | -0.000001171           | 0.000004596  | 0.000003906  |
| 5                | 6                | 0.000000041            | -0.000009116 | -0.000003747 |
| 6                | 8                | 0.000005618            | -0.000004445 | 0.000006374  |
| 7                | 6                | 0.000003423            | 0.000007458  | 0.000000333  |
| 8                | 6                | 0.000002816            | -0.000004664 | -0.000004494 |
| 9                | 6                | -0.000002103           | -0.000006357 | 0.000000306  |
| 10               | 6                | 0.000005935            | 0.000003040  | -0.000005810 |
| 11               | 6                | -0.000008716           | 0.000005362  | 0.000010261  |
| 12               | 6                | 0.000001910            | -0.000004092 | -0.000001270 |
| 13               | 6                | -0.000000102           | -0.000000058 | 0.000004613  |
| 14               | 6                | -0.000001077           | -0.000001636 | -0.000006668 |
| 15               | 7                | 0.000001141            | -0.000007866 | -0.000006637 |
| 16               | 9                | -0.000003700           | -0.000005404 | -0.000001128 |
| 17               | 6                | 0.000001973            | 0.000017105  | -0.000007157 |

|    |   |              |              |              |
|----|---|--------------|--------------|--------------|
| 18 | 9 | -0.000004475 | 0.000008663  | -0.000003523 |
| 19 | 9 | -0.000006421 | 0.000002605  | -0.000000617 |
| 20 | 1 | 0.000000844  | 0.000000179  | 0.000004685  |
| 21 | 1 | 0.000003002  | -0.000001987 | 0.000004526  |
| 22 | 1 | 0.000000133  | -0.000004011 | -0.000004302 |
| 23 | 1 | -0.000002060 | -0.000000175 | -0.000005912 |
| 24 | 1 | -0.000001994 | 0.000002109  | -0.000007024 |
| 25 | 1 | 0.000000748  | 0.000001401  | 0.000003429  |
| 26 | 1 | 0.000001162  | -0.000000290 | 0.000002034  |
| 27 | 1 | 0.000001439  | -0.000001343 | 0.000002534  |
| 28 | 1 | 0.000002184  | -0.000004106 | 0.000001571  |
| 29 | 1 | 0.000000107  | -0.000003238 | -0.000003617 |
| 30 | 1 | -0.000000924 | 0.000001251  | 0.000002390  |
| 31 | 1 | -0.000003717 | 0.000003104  | 0.000000667  |

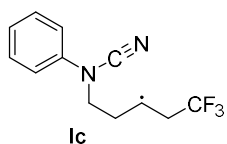

|                                              |                             |
|----------------------------------------------|-----------------------------|
| Zero-point correction=                       | 0.219777 (Hartree/Particle) |
| Thermal correction to Energy=                | 0.236120                    |
| Thermal correction to Enthalpy=              | 0.237064                    |
| Thermal correction to Gibbs Free Energy=     | 0.170604                    |
| Sum of electronic and zero-point Energies=   | -873.322783                 |
| Sum of electronic and thermal Energies=      | -873.306441                 |
| Sum of electronic and thermal Enthalpies=    | -873.305497                 |
| Sum of electronic and thermal Free Energies= | -873.371957                 |

| Center<br>Number | Atomic<br>Number | Forces (Hartrees/Bohr) |              |              |
|------------------|------------------|------------------------|--------------|--------------|
|                  |                  | X                      | Y            | Z            |
| 1                | 6                | -0.000000564           | -0.000000539 | 0.000003742  |
| 2                | 6                | -0.000001895           | 0.000000555  | 0.000004367  |
| 3                | 6                | -0.000001233           | 0.000000431  | 0.000004587  |
| 4                | 6                | 0.000000223            | -0.000000742 | 0.000002288  |
| 5                | 6                | 0.000000861            | -0.000001124 | 0.000002014  |
| 6                | 6                | 0.000000107            | -0.000000777 | 0.000002639  |
| 7                | 7                | 0.000001543            | 0.000001872  | 0.000001890  |
| 8                | 6                | 0.000002444            | -0.000001464 | 0.000000631  |
| 9                | 6                | 0.000000807            | -0.000000195 | -0.000001138 |
| 10               | 6                | -0.000000808           | -0.000001043 | -0.000001776 |
| 11               | 6                | -0.000000459           | -0.000002657 | 0.000003005  |

|    |   |              |              |              |
|----|---|--------------|--------------|--------------|
| 12 | 6 | -0.000001043 | 0.000000530  | -0.000004612 |
| 13 | 7 | 0.000000022  | 0.000000294  | 0.000003893  |
| 14 | 9 | -0.000001006 | 0.000003467  | -0.000007451 |
| 15 | 6 | -0.000002638 | 0.000000832  | -0.000004466 |
| 16 | 9 | -0.000000606 | 0.000001270  | -0.000007322 |
| 17 | 9 | 0.000001184  | 0.000000593  | -0.000006294 |
| 18 | 1 | -0.000001276 | 0.000000236  | 0.000004515  |
| 19 | 1 | -0.000002954 | 0.000001190  | 0.000005466  |
| 20 | 1 | -0.000002709 | 0.000000543  | 0.000003640  |
| 21 | 1 | 0.000001690  | -0.000001976 | 0.000000650  |
| 22 | 1 | 0.000001636  | -0.000001212 | 0.000002392  |
| 23 | 1 | 0.000002763  | -0.000000107 | -0.000000905 |
| 24 | 1 | 0.000002711  | -0.000002127 | 0.000000390  |
| 25 | 1 | 0.000001562  | -0.000000672 | -0.000000718 |
| 26 | 1 | 0.000001833  | -0.000001260 | -0.000002134 |
| 27 | 1 | -0.000001234 | 0.000001211  | -0.000001944 |
| 28 | 1 | 0.000000151  | 0.000000316  | -0.000004124 |
| 29 | 1 | -0.000001113 | 0.000002554  | -0.000003224 |

### TS1c

|                                              |                             |
|----------------------------------------------|-----------------------------|
| Zero-point correction=                       | 0.220317 (Hartree/Particle) |
| Thermal correction to Energy=                | 0.235427                    |
| Thermal correction to Enthalpy=              | 0.236372                    |
| Thermal correction to Gibbs Free Energy=     | 0.174869                    |
| Sum of electronic and zero-point Energies=   | -873.311339                 |
| Sum of electronic and thermal Energies=      | -873.296229                 |
| Sum of electronic and thermal Enthalpies=    | -873.295285                 |
| Sum of electronic and thermal Free Energies= | -873.356787                 |

| Center<br>Number | Atomic<br>Number | Forces (Hartrees/Bohr) |              |              |
|------------------|------------------|------------------------|--------------|--------------|
|                  |                  | X                      | Y            | Z            |
| 1                | 6                | 0.000000273            | 0.000003987  | -0.000001283 |
| 2                | 6                | -0.000000092           | 0.000002544  | -0.000006791 |
| 3                | 6                | -0.000000137           | 0.000000792  | -0.000006929 |
| 4                | 6                | 0.000000058            | 0.000000115  | -0.000001084 |
| 5                | 6                | 0.000000156            | 0.000001746  | 0.000004700  |
| 6                | 6                | 0.000000355            | 0.000003383  | 0.000004306  |
| 7                | 7                | -0.000000298           | -0.000001802 | -0.000000821 |
| 8                | 6                | -0.000000353           | -0.000002254 | 0.000005798  |
| 9                | 6                | -0.000000025           | -0.000006881 | 0.000003650  |
| 10               | 6                | -0.000000250           | -0.000003863 | -0.000002237 |
| 11               | 6                | 0.000000555            | -0.000001182 | -0.000005888 |

|    |   |              |              |              |
|----|---|--------------|--------------|--------------|
| 12 | 6 | -0.000000058 | 0.000001284  | -0.000000468 |
| 13 | 7 | -0.000000542 | -0.000001177 | -0.000011531 |
| 14 | 9 | -0.000000271 | -0.000001845 | -0.000002847 |
| 15 | 6 | 0.000000205  | 0.000001798  | 0.000001035  |
| 16 | 9 | 0.000000820  | 0.000008162  | 0.000001733  |
| 17 | 9 | -0.000000390 | -0.000000923 | 0.000007021  |
| 18 | 1 | 0.000000366  | 0.000005323  | -0.000001498 |
| 19 | 1 | -0.000000084 | 0.000002753  | -0.000010998 |
| 20 | 1 | -0.000000367 | -0.000000390 | -0.000010872 |
| 21 | 1 | -0.000000466 | 0.000001322  | 0.000008302  |
| 22 | 1 | 0.000000569  | 0.000004609  | 0.000008515  |
| 23 | 1 | 0.000000511  | 0.000002105  | 0.000006791  |
| 24 | 1 | 0.000000506  | -0.000005114 | 0.000008370  |
| 25 | 1 | -0.000000645 | -0.000011125 | 0.000002954  |
| 26 | 1 | -0.000000216 | -0.000006237 | 0.000008029  |
| 27 | 1 | -0.000000713 | -0.000006989 | -0.000004893 |
| 28 | 1 | 0.000000245  | 0.000005064  | 0.000002482  |
| 29 | 1 | 0.000000285  | 0.000004794  | -0.000005548 |

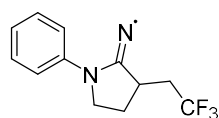

IIc

|                                              |                             |
|----------------------------------------------|-----------------------------|
| Zero-point correction=                       | 0.223910 (Hartree/Particle) |
| Thermal correction to Energy=                | 0.238530                    |
| Thermal correction to Enthalpy=              | 0.239474                    |
| Thermal correction to Gibbs Free Energy=     | 0.179555                    |
| Sum of electronic and zero-point Energies=   | -873.347808                 |
| Sum of electronic and thermal Energies=      | -873.333188                 |
| Sum of electronic and thermal Enthalpies=    | -873.332244                 |
| Sum of electronic and thermal Free Energies= | -873.392163                 |

| Center<br>Number | Atomic<br>Number | Forces (Hartrees/Bohr) |              |              |
|------------------|------------------|------------------------|--------------|--------------|
|                  |                  | X                      | Y            | Z            |
| 1                | 6                | 0.000004337            | -0.000016378 | -0.000000751 |
| 2                | 6                | -0.000016136           | 0.000013982  | -0.000005925 |
| 3                | 6                | -0.000002233           | -0.000001655 | 0.000006113  |
| 4                | 6                | -0.000015676           | 0.000011559  | -0.000006724 |
| 5                | 6                | 0.000004926            | -0.000008672 | 0.000000267  |
| 6                | 6                | 0.000009257            | 0.000007373  | -0.000004217 |
| 7                | 7                | 0.000002027            | -0.000032406 | -0.000001310 |
| 8                | 6                | 0.000007432            | 0.000030806  | -0.000006929 |

|    |   |              |              |              |
|----|---|--------------|--------------|--------------|
| 9  | 6 | -0.000002460 | 0.000001613  | 0.000010710  |
| 10 | 6 | -0.000011819 | -0.000029065 | -0.000019947 |
| 11 | 6 | -0.000012406 | 0.000038922  | -0.000006823 |
| 12 | 6 | 0.000013068  | -0.000001705 | 0.000017277  |
| 13 | 7 | 0.000025087  | -0.000017519 | 0.000011392  |
| 14 | 9 | -0.000021080 | 0.000009301  | -0.000014669 |
| 15 | 6 | 0.000042312  | 0.000024380  | 0.000052683  |
| 16 | 9 | -0.000002501 | -0.000006551 | -0.000002044 |
| 17 | 9 | -0.000019546 | -0.000037956 | -0.000011584 |
| 18 | 1 | 0.000001092  | 0.000003274  | -0.000004124 |
| 19 | 1 | -0.000000166 | 0.000000420  | 0.000002103  |
| 20 | 1 | -0.000004318 | 0.000003649  | 0.000001143  |
| 21 | 1 | 0.000008630  | 0.000005958  | -0.000005993 |
| 22 | 1 | 0.000002299  | -0.000000793 | -0.000007780 |
| 23 | 1 | 0.000000586  | -0.000004759 | -0.000004010 |
| 24 | 1 | -0.000007950 | -0.000001686 | -0.000005666 |
| 25 | 1 | 0.000002949  | 0.000012405  | -0.000002246 |
| 26 | 1 | 0.000005595  | -0.000001417 | -0.000002189 |
| 27 | 1 | -0.000003073 | 0.000003008  | 0.000010934  |
| 28 | 1 | -0.000004581 | -0.000005327 | -0.000003510 |
| 29 | 1 | -0.000005651 | -0.000000760 | 0.000003820  |

## SO<sub>2</sub>

|                                              |                             |
|----------------------------------------------|-----------------------------|
| Zero-point correction=                       | 0.006645 (Hartree/Particle) |
| Thermal correction to Energy=                | 0.009740                    |
| Thermal correction to Enthalpy=              | 0.010684                    |
| Thermal correction to Gibbs Free Energy=     | -0.017598                   |
| Sum of electronic and zero-point Energies=   | -548.598199                 |
| Sum of electronic and thermal Energies=      | -548.595104                 |
| Sum of electronic and thermal Enthalpies=    | -548.594160                 |
| Sum of electronic and thermal Free Energies= | -548.622442                 |

| Center<br>Number | Atomic<br>Number | Forces (Hartrees/Bohr) |              |              |
|------------------|------------------|------------------------|--------------|--------------|
|                  |                  | X                      | Y            | Z            |
| 1                | 16               | 0.000000000            | 0.000000000  | 0.000333150  |
| 2                | 8                | 0.000000000            | 0.000311124  | -0.000166575 |
| 3                | 8                | 0.000000000            | -0.000311124 | -0.000166575 |

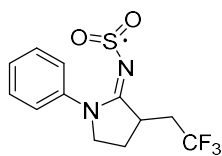

IIIc

|                                              |                             |
|----------------------------------------------|-----------------------------|
| Zero-point correction=                       | 0.234499 (Hartree/Particle) |
| Thermal correction to Energy=                | 0.252493                    |
| Thermal correction to Enthalpy=              | 0.253438                    |
| Thermal correction to Gibbs Free Energy=     | 0.185717                    |
| Sum of electronic and zero-point Energies=   | -1421.941732                |
| Sum of electronic and thermal Energies=      | -1421.923737                |
| Sum of electronic and thermal Enthalpies=    | -1421.922793                |
| Sum of electronic and thermal Free Energies= | -1421.990514                |

| Center<br>Number | Atomic<br>Number | Forces (Hartrees/Bohr) |              |              |
|------------------|------------------|------------------------|--------------|--------------|
|                  |                  | X                      | Y            | Z            |
| 1                | 6                | -0.000003850           | 0.000008352  | 0.000003718  |
| 2                | 6                | 0.000004121            | 0.000007211  | 0.000004845  |
| 3                | 6                | -0.000001328           | 0.000004303  | 0.000007906  |
| 4                | 6                | 0.000005178            | 0.000004166  | 0.000001038  |
| 5                | 6                | -0.000004014           | 0.000008202  | -0.000000524 |
| 6                | 6                | -0.000009855           | 0.000009608  | 0.000004321  |
| 7                | 7                | -0.000006891           | -0.000003573 | -0.000004155 |
| 8                | 6                | -0.000007452           | -0.000002839 | -0.000007884 |
| 9                | 6                | -0.000008469           | -0.000002358 | 0.000003116  |
| 10               | 6                | -0.000000437           | -0.000020248 | -0.000002406 |
| 11               | 6                | 0.000003973            | 0.000023976  | -0.000005344 |
| 12               | 6                | 0.000008430            | 0.000007127  | -0.000012174 |
| 13               | 7                | 0.000002725            | -0.000010839 | -0.000006354 |
| 14               | 16               | 0.000013689            | 0.000003627  | 0.000013616  |
| 15               | 8                | 0.000005275            | 0.000009493  | 0.000007186  |
| 16               | 8                | 0.000005032            | 0.000008806  | 0.000001910  |
| 17               | 9                | 0.000010584            | -0.000007187 | 0.000000947  |
| 18               | 6                | 0.000005525            | -0.000032484 | 0.000004536  |
| 19               | 9                | 0.000001276            | -0.000015415 | -0.000008962 |
| 20               | 9                | -0.000004766           | 0.000002115  | -0.000009010 |
| 21               | 1                | -0.000002465           | 0.000011969  | 0.000006377  |
| 22               | 1                | 0.000003114            | 0.000006172  | 0.000005013  |
| 23               | 1                | 0.000002963            | 0.000000183  | 0.000000844  |
| 24               | 1                | -0.000006304           | 0.000007266  | 0.000003110  |
| 25               | 1                | -0.000007280           | 0.000012796  | 0.000004885  |
| 26               | 1                | -0.000004416           | -0.000001926 | -0.000001769 |
| 27               | 1                | -0.000007838           | 0.000000541  | 0.000000318  |

|    |   |              |              |              |
|----|---|--------------|--------------|--------------|
| 28 | 1 | -0.000005865 | -0.000000824 | -0.000001862 |
| 29 | 1 | -0.000002052 | -0.000008350 | -0.000002168 |
| 30 | 1 | 0.000003725  | -0.000004924 | -0.000002335 |
| 31 | 1 | 0.000006071  | -0.000011391 | -0.000004981 |
| 32 | 1 | 0.000001599  | -0.000013556 | -0.000003758 |

### TS3c

|                                              |                             |
|----------------------------------------------|-----------------------------|
| Zero-point correction=                       | 0.234079 (Hartree/Particle) |
| Thermal correction to Energy=                | 0.250892                    |
| Thermal correction to Enthalpy=              | 0.251837                    |
| Thermal correction to Gibbs Free Energy=     | 0.187999                    |
| Sum of electronic and zero-point Energies=   | -1421.932150                |
| Sum of electronic and thermal Energies=      | -1421.915337                |
| Sum of electronic and thermal Enthalpies=    | -1421.914392                |
| Sum of electronic and thermal Free Energies= | -1421.978230                |

| Center<br>Number | Atomic<br>Number | Forces (Hartrees/Bohr) |              |              |
|------------------|------------------|------------------------|--------------|--------------|
|                  |                  | X                      | Y            | Z            |
| 1                | 6                | 0.000002490            | 0.000005367  | 0.000002667  |
| 2                | 6                | 0.000002256            | 0.000005049  | 0.000002034  |
| 3                | 6                | 0.000001566            | 0.000001905  | -0.000000250 |
| 4                | 6                | 0.000000782            | 0.000001411  | 0.000002232  |
| 5                | 6                | -0.000000849           | 0.000002941  | 0.000002668  |
| 6                | 6                | 0.000000881            | 0.000005097  | 0.000003522  |
| 7                | 7                | -0.000000796           | -0.000000327 | -0.000001000 |
| 8                | 6                | -0.000000393           | -0.000000843 | -0.000003151 |
| 9                | 6                | 0.000000134            | -0.000003975 | -0.000002632 |
| 10               | 6                | 0.000000762            | -0.000005816 | 0.000000131  |
| 11               | 6                | -0.000002126           | 0.000000386  | -0.000003051 |
| 12               | 6                | -0.000001799           | -0.000005352 | -0.000004291 |
| 13               | 7                | -0.000003329           | -0.000000505 | 0.000001635  |
| 14               | 16               | -0.000003343           | 0.000000412  | 0.000006026  |
| 15               | 8                | -0.000002861           | 0.000001819  | 0.000004242  |
| 16               | 8                | -0.000002891           | 0.000001222  | 0.000004012  |
| 17               | 9                | 0.000001460            | 0.000000225  | -0.000001885 |
| 18               | 6                | -0.000002450           | 0.000000334  | -0.000000104 |
| 19               | 9                | 0.000000668            | -0.000002905 | -0.000002473 |
| 20               | 9                | 0.000001214            | -0.000001718 | -0.000005302 |
| 21               | 1                | 0.000002470            | 0.000006474  | 0.000003799  |
| 22               | 1                | 0.000002674            | 0.000004442  | 0.000001348  |
| 23               | 1                | 0.000002676            | 0.000002727  | -0.000000936 |
| 24               | 1                | 0.000003678            | 0.000001522  | 0.000002914  |



|    |   |              |              |              |
|----|---|--------------|--------------|--------------|
| 25 | 1 | 0.000001016  | 0.000005361  | 0.000004501  |
| 26 | 1 | 0.000002108  | -0.000000719 | -0.000003493 |
| 27 | 1 | 0.000000783  | -0.000002586 | -0.000002369 |
| 28 | 1 | -0.000000942 | -0.000004415 | -0.000003071 |
| 29 | 1 | 0.000000746  | -0.000004754 | -0.000004008 |
| 30 | 1 | -0.000002370 | -0.000004633 | -0.000000620 |
| 31 | 1 | -0.000002413 | -0.000002749 | 0.000000503  |
| 32 | 1 | -0.000001803 | -0.000005397 | -0.000003599 |

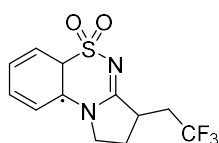

IVc

|                                              |                             |
|----------------------------------------------|-----------------------------|
| Zero-point correction=                       | 0.234765 (Hartree/Particle) |
| Thermal correction to Energy=                | 0.251914                    |
| Thermal correction to Enthalpy=              | 0.252858                    |
| Thermal correction to Gibbs Free Energy=     | 0.188068                    |
| Sum of electronic and zero-point Energies=   | -1421.933757                |
| Sum of electronic and thermal Energies=      | -1421.916608                |
| Sum of electronic and thermal Enthalpies=    | -1421.915664                |
| Sum of electronic and thermal Free Energies= | -1421.980453                |

| Center<br>Number | Atomic<br>Number | Forces (Hartrees/Bohr) |              |              |
|------------------|------------------|------------------------|--------------|--------------|
|                  |                  | X                      | Y            | Z            |
| 1                | 6                | 0.000003398            | 0.000009010  | -0.000002931 |
| 2                | 6                | 0.000000186            | 0.000003642  | -0.000001323 |
| 3                | 6                | -0.000002280           | -0.000003117 | 0.000006520  |
| 4                | 6                | -0.000004342           | 0.000003606  | 0.000000795  |
| 5                | 6                | 0.000002513            | -0.000006745 | -0.000001715 |
| 6                | 6                | 0.000006373            | 0.000003572  | -0.000002054 |
| 7                | 7                | -0.000020060           | 0.000008711  | 0.000010174  |
| 8                | 6                | -0.000000069           | 0.000002234  | 0.000020593  |
| 9                | 6                | -0.000003812           | -0.000006754 | -0.000003402 |
| 10               | 6                | 0.000005003            | -0.000012501 | -0.000000936 |
| 11               | 6                | 0.000009325            | -0.000005214 | -0.000003819 |
| 12               | 6                | 0.000003697            | -0.000004640 | 0.000011413  |
| 13               | 7                | -0.000013306           | -0.000004713 | -0.000000394 |
| 14               | 16               | 0.000003286            | 0.000019349  | -0.000014900 |
| 15               | 8                | -0.000000441           | 0.000000757  | -0.000015575 |
| 16               | 8                | -0.000007795           | -0.000001881 | -0.000001549 |
| 17               | 9                | -0.000010659           | 0.000018171  | -0.000009159 |

|    |   |              |              |              |
|----|---|--------------|--------------|--------------|
| 18 | 6 | 0.000036047  | -0.000017067 | -0.000017723 |
| 19 | 9 | 0.000007961  | -0.000001132 | 0.000001069  |
| 20 | 9 | -0.000010617 | 0.000005141  | 0.000008825  |
| 21 | 1 | 0.000003814  | 0.000008703  | -0.000004949 |
| 22 | 1 | 0.000003487  | 0.000004627  | 0.000000758  |
| 23 | 1 | -0.000002572 | -0.000003813 | -0.000001832 |
| 24 | 1 | 0.000001295  | 0.000002552  | -0.000004851 |
| 25 | 1 | 0.000001440  | 0.000008480  | -0.000008211 |
| 26 | 1 | 0.000001996  | -0.000004453 | 0.000008304  |
| 27 | 1 | -0.000001715 | 0.000003399  | 0.000005358  |
| 28 | 1 | -0.000002668 | -0.000007465 | 0.000005716  |
| 29 | 1 | 0.000000578  | -0.000005484 | 0.000006058  |
| 30 | 1 | -0.000005099 | -0.000007349 | 0.000000331  |
| 31 | 1 | -0.000000625 | -0.000000893 | 0.000004055  |
| 32 | 1 | -0.000004337 | -0.000008735 | 0.000005352  |

---

## IX. References

1. Ebule, R.; Mudshinge, S.; Nantz, M. H.; Mashuta, M. S.; Hammond, G. B.; Xu, B., *J. Org. Chem.* **2019**, *84*, 3249-3259.
2. Zhao, S.; Zang, Z.-L.; Li, S.; Wen, X.; Wang, C.; Guo, J.; He, Y., *J. Org. Chem.* **2020**, *85*, 9321-9330.
3. Fan, R.; Pu, D.; Wen, F.; Ye, Y.; Wang, X., *J. Org. Chem.* **2008**, *73*, 3623-3625.
4. Masuyama, Y.; Tosa, J.; Kurusu, Y., *Chem. Commun.* **1999**, 1075-1076.
5. Qian, P.; Deng, Y.; Mei, H.; Han, J.; Zhou, J.; Pan, Y., *Org. Lett.* **2017**, *19*, 4798-4801.
6. Castillo, J.-C.; Orrego-Hernández, J.; Portilla, J., *Eur. J. Org. Chem.* **2016**, *2016*, 3824-3835.
7. Kobayashi, Y.; Inukai, S.; Kondo, N.; Watanabe, T.; Sugiyama, Y.; Hamamoto, H.; Shioiri, T.; Matsugi, M., *Tetrahedron Lett* **2015**, *56*, 1363-1366.
8. Shen, Y.; Wang, C.; Chen, W.; Cui, S., *Org. Chem. Front.* **2018**, *5*, 3574-3578.
9. Wang, J.; Chen, S.; Zhao, Y., *Synthesis* **2006**, *2006*, 1705-1710.
10. Li, Z.; Jiao, L.; Sun, Y.; He, Z.; Wei, Z.; Liao, W.-W., *Angew. Chem. Int. Ed.* **2020**, *59*, 7266-7270.
11. Zheng, J.; Deng, Z.; Zhang, Y.; Cui, S., *Adv. Synth. Catal.* **2016**, *358*, 746-751.
12. Ruan, Z.; Huang, Z.; Xu, Z.; Mo, G.; Tian, X.; Yu, X.-Y.; Ackermann, L. *Org. Lett.* **2019**, *21*, 1237-1240.
13. Hu, X.; Zhang, G.; Nie, L.; Kong, T.; Lei, A. *Nat. Commun.* **2019**, *10*, 5467.
14. M. J. Frisch, G. W. Trucks, H. B. Schlegel, G. E. Scuseria, M. A. Robb, J. R. Cheeseman, G. Scalmani, V. Barone, G. A. Petersson, H. Nakatsuji, X. Li, M. Caricato, A. V. Marenich, J. Bloino, B. G. Janesko, R. Gomperts, B. Mennucci, H. P. Hratchian, J. V. Ortiz, A. F. Izmaylov, J. L. Sonnenberg, Williams, F. Ding, F. Lipparini, F. Egidi, J. Goings, B. Peng, A. Petrone, T. Henderson, D. Ranasinghe, V. G. Zakrzewski, J. Gao, N. Rega, G. Zheng, W. Liang, M. Hada, M. Ehara, K. Toyota, R. Fukuda, J. Hasegawa, M. Ishida, T. Nakajima, Y. Honda, O. Kitao, H. Nakai, T. Vreven, K. Throssell, J. A. Montgomery Jr., J. E. Peralta, F. Ogliaro, M. J. Bearpark, J. J. Heyd, E. N. Brothers, K. N. Kudin, V. N. Staroverov, T. A. Keith, R. Kobayashi, J. Normand, K. Raghavachari, A. P. Rendell, J. C. Burant, S. S. Iyengar, J. Tomasi, M. Cossi, J. M. Millam, M. Klene, C. Adamo, R. Cammi, J. W. Ochterski, R. L. Martin, K. Morokuma, O. Farkas, J. B. Foresman, D. J. Fox, Wallingford, CT, **2016**.

## X. Crystal Data and Structure Refinements

### 1. Compound 3ab-(E):

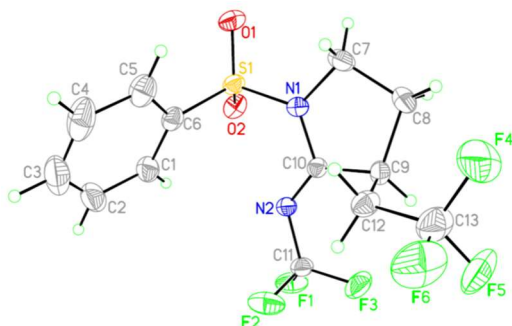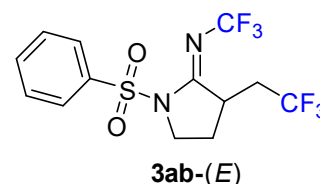

CCDC number: 2189917

Table 1. Crystal data and structure refinement for **3ab**.

|                                   |                                                                                |                  |
|-----------------------------------|--------------------------------------------------------------------------------|------------------|
| Identification code               | 3ab                                                                            |                  |
| Empirical formula                 | C <sub>13</sub> H <sub>12</sub> F <sub>6</sub> N <sub>2</sub> O <sub>2</sub> S |                  |
| Formula weight                    | 374.31                                                                         |                  |
| Temperature                       | 293(2) K                                                                       |                  |
| Wavelength                        | 0.71073 Å                                                                      |                  |
| Crystal system                    | Monoclinic                                                                     |                  |
| Space group                       | P2 <sub>1</sub> /c                                                             |                  |
| Unit cell dimensions              | a = 11.9474(9) Å                                                               | α = 90°.         |
|                                   | b = 33.043(3) Å                                                                | β = 104.806(2)°. |
|                                   | c = 8.2924(9) Å                                                                | γ = 90°.         |
| Volume                            | 3165.0(5) Å <sup>3</sup>                                                       |                  |
| Z                                 | 8                                                                              |                  |
| Density (calculated)              | 1.571 Mg/m <sup>3</sup>                                                        |                  |
| Absorption coefficient            | 0.279 mm <sup>-1</sup>                                                         |                  |
| F(000)                            | 1520                                                                           |                  |
| Crystal size                      | 0.200 x 0.180 x 0.170 mm <sup>3</sup>                                          |                  |
| Theta range for data collection   | 2.555 to 25.150°.                                                              |                  |
| Index ranges                      | -14 ≤ h ≤ 14, -39 ≤ k ≤ 39, -9 ≤ l ≤ 9                                         |                  |
| Reflections collected             | 159031                                                                         |                  |
| Independent reflections           | 5657 [R(int) = 0.0881]                                                         |                  |
| Completeness to theta = 25.150°   | 99.9 %                                                                         |                  |
| Refinement method                 | Full-matrix least-squares on F <sup>2</sup>                                    |                  |
| Data / restraints / parameters    | 5657 / 0 / 409                                                                 |                  |
| Goodness-of-fit on F <sup>2</sup> | 1.063                                                                          |                  |
| Final R indices [I > 2σ(I)]       | R1 = 0.0863, wR2 = 0.2041                                                      |                  |

R indices (all data) R1 = 0.0958, wR2 = 0.2130

Extinction coefficient n/a

Largest diff. peak and hole 0.917 and -0.697 e.Å<sup>-3</sup>

Table 2. Atomic coordinates (x 10<sup>4</sup>) and equivalent isotropic displacement parameters (Å<sup>2</sup>x 10<sup>3</sup>) for Y. U(eq) is defined as one third of the trace of the orthogonalized U<sup>ij</sup> tensor.

|       | x        | y       | z        | U(eq)  |
|-------|----------|---------|----------|--------|
| C(1)  | 8280(1)  | 334(1)  | 6867(1)  | 78(1)  |
| C(2)  | 8424(1)  | -42(1)  | 6191(2)  | 110(1) |
| C(3)  | 9502(1)  | -228(1) | 6602(2)  | 129(1) |
| C(4)  | 10437(1) | -40(1)  | 7688(2)  | 118(1) |
| C(5)  | 10293(1) | 336(1)  | 8364(2)  | 84(1)  |
| C(6)  | 9215(1)  | 523(1)  | 7954(1)  | 59(1)  |
| C(7)  | 10560(2) | 1574(1) | 8580(2)  | 71(1)  |
| C(8)  | 10486(2) | 1910(1) | 7322(3)  | 74(1)  |
| C(9)  | 9850(2)  | 1722(1) | 5632(2)  | 56(1)  |
| C(10) | 9042(1)  | 1420(1) | 6163(2)  | 47(1)  |
| C(11) | 7669(2)  | 1296(1) | 3654(2)  | 58(1)  |
| C(12) | 10622(2) | 1491(1) | 4746(2)  | 64(1)  |
| C(13) | 11371(2) | 1740(1) | 3985(3)  | 102(1) |
| C(14) | 3641(1)  | 725(1)  | 10691(1) | 69(1)  |
| C(15) | 4045(1)  | 576(1)  | 12303(1) | 92(1)  |
| C(16) | 5138(1)  | 402(1)  | 12800(2) | 92(1)  |
| C(17) | 5829(1)  | 377(1)  | 11685(2) | 89(1)  |
| C(18) | 5425(1)  | 526(1)  | 10073(2) | 68(1)  |
| C(19) | 4331(1)  | 700(1)  | 9576(1)  | 50(1)  |
| C(20) | 5142(2)  | 1327(1) | 6088(2)  | 58(1)  |
| C(21) | 5295(2)  | 1780(1) | 6047(2)  | 59(1)  |
| C(22) | 5287(1)  | 1923(1) | 7807(2)  | 45(1)  |
| C(23) | 4448(1)  | 1623(1) | 8268(2)  | 43(1)  |
| C(24) | 3811(2)  | 1971(1) | 10298(2) | 68(1)  |
| C(25) | 6457(1)  | 1892(1) | 9106(2)  | 54(1)  |
| C(26) | 7313(2)  | 2200(1) | 8913(3)  | 72(1)  |
| F(1)  | 6534(1)  | 1288(1) | 3288(1)  | 91(1)  |
| F(2)  | 7972(1)  | 992(1)  | 2802(2)  | 104(1) |
| F(3)  | 7968(1)  | 1622(1) | 2954(2)  | 122(1) |
| F(4)  | 12162(1) | 1943(1) | 5103(2)  | 164(1) |

|       |          |         |          |        |
|-------|----------|---------|----------|--------|
| F(5)  | 10802(2) | 1993(1) | 2875(2)  | 147(1) |
| F(6)  | 11986(1) | 1513(1) | 3171(2)  | 149(1) |
| F(7)  | 2907(1)  | 1995(1) | 10805(2) | 152(1) |
| F(8)  | 4645(2)  | 1999(1) | 11534(2) | 254(1) |
| F(9)  | 3826(2)  | 2314(1) | 9644(2)  | 231(1) |
| F(10) | 7673(1)  | 2146(1) | 7529(2)  | 120(1) |
| F(11) | 8274(1)  | 2192(1) | 10129(2) | 110(1) |
| F(12) | 6911(1)  | 2573(1) | 8836(2)  | 121(1) |
| N(1)  | 9501(1)  | 1336(1) | 7826(2)  | 55(1)  |
| N(2)  | 8136(1)  | 1237(1) | 5352(2)  | 51(1)  |
| N(3)  | 4448(1)  | 1282(1) | 7319(2)  | 50(1)  |
| N(4)  | 3825(1)  | 1635(1) | 9317(2)  | 51(1)  |
| O(1)  | 9808(1)  | 994(1)  | 10506(2) | 85(1)  |
| O(2)  | 7822(1)  | 1032(1) | 8726(2)  | 72(1)  |
| O(3)  | 4152(1)  | 578(1)  | 6450(2)  | 79(1)  |
| O(4)  | 2571(1)  | 924(1)  | 7268(2)  | 76(1)  |
| S(1)  | 9022(1)  | 976(1)  | 8902(1)  | 57(1)  |
| S(2)  | 3774(1)  | 850(1)  | 7528(1)  | 54(1)  |

Table 3. Bond lengths [ $\text{\AA}$ ] and angles [ $^\circ$ ] for Y.

|            |            |
|------------|------------|
| C(1)-C(2)  | 1.3900     |
| C(1)-C(6)  | 1.3900     |
| C(1)-H(1)  | 0.9300     |
| C(2)-C(3)  | 1.3900     |
| C(2)-H(2)  | 0.9300     |
| C(3)-C(4)  | 1.3900     |
| C(3)-H(3)  | 0.9300     |
| C(4)-C(5)  | 1.3900     |
| C(4)-H(4)  | 0.9300     |
| C(5)-C(6)  | 1.3900     |
| C(5)-H(5)  | 0.9300     |
| C(6)-S(1)  | 1.7358(13) |
| C(7)-N(1)  | 1.485(2)   |
| C(7)-C(8)  | 1.510(3)   |
| C(7)-H(7A) | 0.9700     |
| C(7)-H(7B) | 0.9700     |

|              |            |
|--------------|------------|
| C(8)-C(9)    | 1.543(3)   |
| C(8)-H(8A)   | 0.9700     |
| C(8)-H(8B)   | 0.9700     |
| C(9)-C(12)   | 1.524(3)   |
| C(9)-C(10)   | 1.531(2)   |
| C(9)-H(9)    | 0.9800     |
| C(10)-N(2)   | 1.2709(19) |
| C(10)-N(1)   | 1.3748(19) |
| C(11)-F(1)   | 1.312(2)   |
| C(11)-F(3)   | 1.317(2)   |
| C(11)-F(2)   | 1.329(2)   |
| C(11)-N(2)   | 1.390(2)   |
| C(12)-C(13)  | 1.472(3)   |
| C(12)-H(12A) | 0.9700     |
| C(12)-H(12B) | 0.9700     |
| C(13)-F(5)   | 1.300(3)   |
| C(13)-F(4)   | 1.325(3)   |
| C(13)-F(6)   | 1.347(3)   |
| C(14)-C(15)  | 1.3900     |
| C(14)-C(19)  | 1.3900     |
| C(14)-H(14)  | 0.9300     |
| C(15)-C(16)  | 1.3900     |
| C(15)-H(15)  | 0.9300     |
| C(16)-C(17)  | 1.3900     |
| C(16)-H(16)  | 0.9300     |
| C(17)-C(18)  | 1.3900     |
| C(17)-H(17)  | 0.9300     |
| C(18)-C(19)  | 1.3900     |
| C(18)-H(18)  | 0.9300     |
| C(19)-S(2)   | 1.7308(10) |
| C(20)-N(3)   | 1.478(2)   |
| C(20)-C(21)  | 1.512(3)   |
| C(20)-H(20A) | 0.9700     |
| C(20)-H(20B) | 0.9700     |
| C(21)-C(22)  | 1.536(2)   |
| C(21)-H(21A) | 0.9700     |
| C(21)-H(21B) | 0.9700     |
| C(22)-C(23)  | 1.528(2)   |

|              |            |
|--------------|------------|
| C(22)-C(25)  | 1.535(2)   |
| C(22)-H(22)  | 0.9800     |
| C(23)-N(4)   | 1.281(2)   |
| C(23)-N(3)   | 1.3733(19) |
| C(24)-F(8)   | 1.237(2)   |
| C(24)-F(7)   | 1.257(3)   |
| C(24)-F(9)   | 1.258(3)   |
| C(24)-N(4)   | 1.379(2)   |
| C(25)-C(26)  | 1.480(3)   |
| C(25)-H(25A) | 0.9700     |
| C(25)-H(25B) | 0.9700     |
| C(26)-F(12)  | 1.317(3)   |
| C(26)-F(11)  | 1.321(2)   |
| C(26)-F(10)  | 1.337(3)   |
| N(1)-S(1)    | 1.6736(16) |
| N(3)-S(2)    | 1.6691(14) |
| O(1)-S(1)    | 1.4189(13) |
| O(2)-S(1)    | 1.4160(14) |
| O(3)-S(2)    | 1.4206(15) |
| O(4)-S(2)    | 1.4196(15) |

|                |           |
|----------------|-----------|
| C(2)-C(1)-C(6) | 120.0     |
| C(2)-C(1)-H(1) | 120.0     |
| C(6)-C(1)-H(1) | 120.0     |
| C(1)-C(2)-C(3) | 120.0     |
| C(1)-C(2)-H(2) | 120.0     |
| C(3)-C(2)-H(2) | 120.0     |
| C(4)-C(3)-C(2) | 120.0     |
| C(4)-C(3)-H(3) | 120.0     |
| C(2)-C(3)-H(3) | 120.0     |
| C(5)-C(4)-C(3) | 120.0     |
| C(5)-C(4)-H(4) | 120.0     |
| C(3)-C(4)-H(4) | 120.0     |
| C(6)-C(5)-C(4) | 120.0     |
| C(6)-C(5)-H(5) | 120.0     |
| C(4)-C(5)-H(5) | 120.0     |
| C(5)-C(6)-C(1) | 120.0     |
| C(5)-C(6)-S(1) | 119.63(6) |

|                     |            |
|---------------------|------------|
| C(1)-C(6)-S(1)      | 120.25(6)  |
| N(1)-C(7)-C(8)      | 101.83(14) |
| N(1)-C(7)-H(7A)     | 111.4      |
| C(8)-C(7)-H(7A)     | 111.4      |
| N(1)-C(7)-H(7B)     | 111.4      |
| C(8)-C(7)-H(7B)     | 111.4      |
| H(7A)-C(7)-H(7B)    | 109.3      |
| C(7)-C(8)-C(9)      | 105.09(15) |
| C(7)-C(8)-H(8A)     | 110.7      |
| C(9)-C(8)-H(8A)     | 110.7      |
| C(7)-C(8)-H(8B)     | 110.7      |
| C(9)-C(8)-H(8B)     | 110.7      |
| H(8A)-C(8)-H(8B)    | 108.8      |
| C(12)-C(9)-C(10)    | 108.27(14) |
| C(12)-C(9)-C(8)     | 114.93(15) |
| C(10)-C(9)-C(8)     | 101.66(15) |
| C(12)-C(9)-H(9)     | 110.5      |
| C(10)-C(9)-H(9)     | 110.5      |
| C(8)-C(9)-H(9)      | 110.5      |
| N(2)-C(10)-N(1)     | 120.23(15) |
| N(2)-C(10)-C(9)     | 132.22(14) |
| N(1)-C(10)-C(9)     | 107.45(13) |
| F(1)-C(11)-F(3)     | 107.19(15) |
| F(1)-C(11)-F(2)     | 105.52(15) |
| F(3)-C(11)-F(2)     | 104.04(16) |
| F(1)-C(11)-N(2)     | 110.78(16) |
| F(3)-C(11)-N(2)     | 118.50(15) |
| F(2)-C(11)-N(2)     | 109.89(15) |
| C(13)-C(12)-C(9)    | 115.76(19) |
| C(13)-C(12)-H(12A)  | 108.3      |
| C(9)-C(12)-H(12A)   | 108.3      |
| C(13)-C(12)-H(12B)  | 108.3      |
| C(9)-C(12)-H(12B)   | 108.3      |
| H(12A)-C(12)-H(12B) | 107.4      |
| F(5)-C(13)-F(4)     | 108.7(2)   |
| F(5)-C(13)-F(6)     | 104.9(2)   |
| F(4)-C(13)-F(6)     | 104.4(2)   |
| F(5)-C(13)-C(12)    | 113.5(2)   |



|                     |            |
|---------------------|------------|
| F(4)-C(13)-C(12)    | 112.7(2)   |
| F(6)-C(13)-C(12)    | 111.9(2)   |
| C(15)-C(14)-C(19)   | 120.0      |
| C(15)-C(14)-H(14)   | 120.0      |
| C(19)-C(14)-H(14)   | 120.0      |
| C(14)-C(15)-C(16)   | 120.0      |
| C(14)-C(15)-H(15)   | 120.0      |
| C(16)-C(15)-H(15)   | 120.0      |
| C(17)-C(16)-C(15)   | 120.0      |
| C(17)-C(16)-H(16)   | 120.0      |
| C(15)-C(16)-H(16)   | 120.0      |
| C(16)-C(17)-C(18)   | 120.0      |
| C(16)-C(17)-H(17)   | 120.0      |
| C(18)-C(17)-H(17)   | 120.0      |
| C(19)-C(18)-C(17)   | 120.0      |
| C(19)-C(18)-H(18)   | 120.0      |
| C(17)-C(18)-H(18)   | 120.0      |
| C(18)-C(19)-C(14)   | 120.0      |
| C(18)-C(19)-S(2)    | 120.39(6)  |
| C(14)-C(19)-S(2)    | 119.42(6)  |
| N(3)-C(20)-C(21)    | 101.92(14) |
| N(3)-C(20)-H(20A)   | 111.4      |
| C(21)-C(20)-H(20A)  | 111.4      |
| N(3)-C(20)-H(20B)   | 111.4      |
| C(21)-C(20)-H(20B)  | 111.4      |
| H(20A)-C(20)-H(20B) | 109.2      |
| C(20)-C(21)-C(22)   | 104.66(13) |
| C(20)-C(21)-H(21A)  | 110.8      |
| C(22)-C(21)-H(21A)  | 110.8      |
| C(20)-C(21)-H(21B)  | 110.8      |
| C(22)-C(21)-H(21B)  | 110.8      |
| H(21A)-C(21)-H(21B) | 108.9      |
| C(23)-C(22)-C(25)   | 108.60(12) |
| C(23)-C(22)-C(21)   | 101.66(12) |
| C(25)-C(22)-C(21)   | 114.86(14) |
| C(23)-C(22)-H(22)   | 110.5      |
| C(25)-C(22)-H(22)   | 110.4      |
| C(21)-C(22)-H(22)   | 110.5      |

|                     |            |
|---------------------|------------|
| N(4)-C(23)-N(3)     | 119.97(14) |
| N(4)-C(23)-C(22)    | 133.01(14) |
| N(3)-C(23)-C(22)    | 107.01(13) |
| F(8)-C(24)-F(7)     | 107.29(19) |
| F(8)-C(24)-F(9)     | 101.10(19) |
| F(7)-C(24)-F(9)     | 101.30(19) |
| F(8)-C(24)-N(4)     | 114.84(18) |
| F(7)-C(24)-N(4)     | 112.89(16) |
| F(9)-C(24)-N(4)     | 117.82(17) |
| C(26)-C(25)-C(22)   | 114.07(14) |
| C(26)-C(25)-H(25A)  | 108.7      |
| C(22)-C(25)-H(25A)  | 108.7      |
| C(26)-C(25)-H(25B)  | 108.7      |
| C(22)-C(25)-H(25B)  | 108.7      |
| H(25A)-C(25)-H(25B) | 107.6      |
| F(12)-C(26)-F(11)   | 106.95(18) |
| F(12)-C(26)-F(10)   | 106.03(19) |
| F(11)-C(26)-F(10)   | 104.13(17) |
| F(12)-C(26)-C(25)   | 113.30(18) |
| F(11)-C(26)-C(25)   | 113.17(18) |
| F(10)-C(26)-C(25)   | 112.55(17) |
| C(10)-N(1)-C(7)     | 113.26(14) |
| C(10)-N(1)-S(1)     | 125.02(11) |
| C(7)-N(1)-S(1)      | 121.49(11) |
| C(10)-N(2)-C(11)    | 122.50(15) |
| C(23)-N(3)-C(20)    | 113.39(13) |
| C(23)-N(3)-S(2)     | 124.79(12) |
| C(20)-N(3)-S(2)     | 121.80(11) |
| C(23)-N(4)-C(24)    | 121.49(15) |
| O(2)-S(1)-O(1)      | 120.08(9)  |
| O(2)-S(1)-N(1)      | 109.17(8)  |
| O(1)-S(1)-N(1)      | 103.71(8)  |
| O(2)-S(1)-C(6)      | 108.24(7)  |
| O(1)-S(1)-C(6)      | 109.09(8)  |
| N(1)-S(1)-C(6)      | 105.62(7)  |
| O(4)-S(2)-O(3)      | 118.98(9)  |
| O(4)-S(2)-N(3)      | 109.56(8)  |
| O(3)-S(2)-N(3)      | 103.70(8)  |

|                 |           |
|-----------------|-----------|
| O(4)-S(2)-C(19) | 108.59(8) |
| O(3)-S(2)-C(19) | 109.37(6) |
| N(3)-S(2)-C(19) | 105.84(6) |

---

Symmetry transformations used to generate equivalent atoms:

Table 4. Anisotropic displacement parameters ( $\text{\AA}^2 \times 10^3$ ) for Y. The anisotropic displacement factor exponent takes the form:  $-2\pi^2 [ h^2 a^* U^{11} + \dots + 2 h k a^* b^* U^{12} ]$

|       | U <sup>11</sup> | U <sup>22</sup> | U <sup>33</sup> | U <sup>23</sup> | U <sup>13</sup> | U <sup>12</sup> |
|-------|-----------------|-----------------|-----------------|-----------------|-----------------|-----------------|
| C(1)  | 95(1)           | 64(1)           | 78(1)           | 2(1)            | 25(1)           | -13(1)          |
| C(2)  | 177(2)          | 69(1)           | 90(1)           | -12(1)          | 45(1)           | -36(1)          |
| C(3)  | 225(3)          | 63(1)           | 129(2)          | 1(1)            | 100(1)          | 2(2)            |
| C(4)  | 153(2)          | 85(1)           | 145(2)          | 27(1)           | 90(1)           | 49(1)           |
| C(5)  | 82(1)           | 79(1)           | 98(1)           | 13(1)           | 35(1)           | 18(1)           |
| C(6)  | 69(1)           | 58(1)           | 56(1)           | 11(1)           | 27(1)           | 2(1)            |
| C(7)  | 69(1)           | 78(1)           | 56(1)           | -14(1)          | 2(1)            | -15(1)          |
| C(8)  | 77(1)           | 68(1)           | 73(1)           | -10(1)          | 13(1)           | -23(1)          |
| C(9)  | 59(1)           | 45(1)           | 59(1)           | 5(1)            | 7(1)            | -7(1)           |
| C(10) | 51(1)           | 44(1)           | 44(1)           | 1(1)            | 11(1)           | 4(1)            |
| C(11) | 58(1)           | 68(1)           | 43(1)           | 2(1)            | 4(1)            | -6(1)           |
| C(12) | 56(1)           | 80(1)           | 56(1)           | 10(1)           | 15(1)           | -4(1)           |
| C(13) | 86(1)           | 140(2)          | 82(1)           | 15(1)           | 27(1)           | -29(1)          |
| C(14) | 86(1)           | 69(1)           | 54(1)           | 4(1)            | 22(1)           | -14(1)          |
| C(15) | 144(2)          | 88(1)           | 47(1)           | -1(1)           | 31(1)           | -38(1)          |
| C(16) | 147(2)          | 63(1)           | 53(1)           | 8(1)            | -1(1)           | -24(1)          |
| C(17) | 105(2)          | 54(1)           | 83(1)           | 4(1)            | -21(1)          | -4(1)           |
| C(18) | 82(1)           | 50(1)           | 67(1)           | 1(1)            | 7(1)            | -4(1)           |
| C(19) | 69(1)           | 36(1)           | 41(1)           | 1(1)            | 8(1)            | -10(1)          |
| C(20) | 78(1)           | 60(1)           | 40(1)           | -5(1)           | 24(1)           | -2(1)           |
| C(21) | 76(1)           | 66(1)           | 38(1)           | 4(1)            | 20(1)           | -12(1)          |
| C(22) | 53(1)           | 42(1)           | 40(1)           | 6(1)            | 15(1)           | 0(1)            |
| C(23) | 58(1)           | 38(1)           | 34(1)           | 3(1)            | 13(1)           | 1(1)            |
| C(24) | 79(1)           | 66(1)           | 70(1)           | -32(1)          | 38(1)           | -24(1)          |
| C(25) | 57(1)           | 58(1)           | 48(1)           | 4(1)            | 15(1)           | 3(1)            |
| C(26) | 67(1)           | 74(1)           | 76(1)           | -6(1)           | 20(1)           | -9(1)           |
| F(1)  | 56(1)           | 151(1)          | 61(1)           | -7(1)           | 3(1)            | 3(1)            |

|       |        |        |        |         |        |         |
|-------|--------|--------|--------|---------|--------|---------|
| F(2)  | 105(1) | 145(1) | 63(1)  | -28(1)  | 23(1)  | 17(1)   |
| F(3)  | 134(1) | 125(1) | 75(1)  | 48(1)   | -29(1) | -49(1)  |
| F(4)  | 132(1) | 242(2) | 126(1) | -13(1)  | 44(1)  | -114(1) |
| F(5)  | 170(1) | 152(1) | 128(1) | 73(1)   | 56(1)  | -15(1)  |
| F(6)  | 112(1) | 231(2) | 128(1) | 7(1)    | 76(1)  | -7(1)   |
| F(7)  | 135(1) | 154(1) | 205(1) | -114(1) | 116(1) | -54(1)  |
| F(8)  | 174(2) | 312(1) | 206(1) | -214(1) | -77(1) | 116(1)  |
| F(9)  | 445(2) | 66(1)  | 289(1) | -51(1)  | 288(1) | -28(1)  |
| F(10) | 108(1) | 169(1) | 99(1)  | -13(1)  | 56(1)  | -52(1)  |
| F(11) | 68(1)  | 147(1) | 103(1) | -2(1)   | 0(1)   | -24(1)  |
| F(12) | 102(1) | 61(1)  | 186(2) | -3(1)   | 14(1)  | -18(1)  |
| N(1)  | 59(1)  | 57(1)  | 44(1)  | 1(1)    | 6(1)   | -4(1)   |
| N(2)  | 55(1)  | 54(1)  | 42(1)  | 0(1)    | 10(1)  | -7(1)   |
| N(3)  | 78(1)  | 38(1)  | 39(1)  | 2(1)    | 24(1)  | -3(1)   |
| N(4)  | 64(1)  | 49(1)  | 48(1)  | -9(1)   | 27(1)  | -9(1)   |
| O(1)  | 112(1) | 89(1)  | 45(1)  | 8(1)    | 4(1)   | 5(1)    |
| O(2)  | 72(1)  | 80(1)  | 73(1)  | 13(1)   | 37(1)  | 15(1)   |
| O(3)  | 147(1) | 45(1)  | 46(1)  | -11(1)  | 26(1)  | -6(1)   |
| O(4)  | 68(1)  | 73(1)  | 73(1)  | 11(1)   | -8(1)  | -13(1)  |
| S(1)  | 69(1)  | 61(1)  | 43(1)  | 5(1)    | 16(1)  | 6(1)    |
| S(2)  | 80(1)  | 39(1)  | 37(1)  | -1(1)   | 8(1)   | -8(1)   |

Table 5. Hydrogen coordinates ( $\times 10^4$ ) and isotropic displacement parameters ( $\text{\AA}^2 \times 10^{-3}$ ) for Y.

|       | x     | y    | z    | U(eq) |
|-------|-------|------|------|-------|
| H(1)  | 7559  | 459  | 6592 | 94    |
| H(2)  | 7799  | -168 | 5464 | 132   |
| H(3)  | 9599  | -480 | 6150 | 155   |
| H(4)  | 11158 | -165 | 7963 | 142   |
| H(5)  | 10918 | 462  | 9091 | 101   |
| H(7A) | 11254 | 1413 | 8689 | 85    |
| H(7B) | 10544 | 1680 | 9665 | 85    |
| H(8A) | 11253 | 2001 | 7296 | 89    |
| H(8B) | 10056 | 2138 | 7590 | 89    |

|        |       |      |       |     |
|--------|-------|------|-------|-----|
| H(9)   | 9401  | 1929 | 4895  | 67  |
| H(12A) | 11109 | 1309 | 5542  | 77  |
| H(12B) | 10132 | 1326 | 3879  | 77  |
| H(14)  | 2909  | 841  | 10359 | 82  |
| H(15)  | 3583  | 593  | 13050 | 110 |
| H(16)  | 5408  | 303  | 13879 | 111 |
| H(17)  | 6560  | 261  | 12017 | 107 |
| H(18)  | 5887  | 509  | 9326  | 82  |
| H(20A) | 4730  | 1223 | 5004  | 70  |
| H(20B) | 5881  | 1189 | 6453  | 70  |
| H(21A) | 4666  | 1903 | 5215  | 71  |
| H(21B) | 6022  | 1848 | 5796  | 71  |
| H(22)  | 4982  | 2199 | 7771  | 54  |
| H(25A) | 6329  | 1917 | 10210 | 65  |
| H(25B) | 6780  | 1625 | 9029  | 65  |

## 2. Compound 4aa-syn:

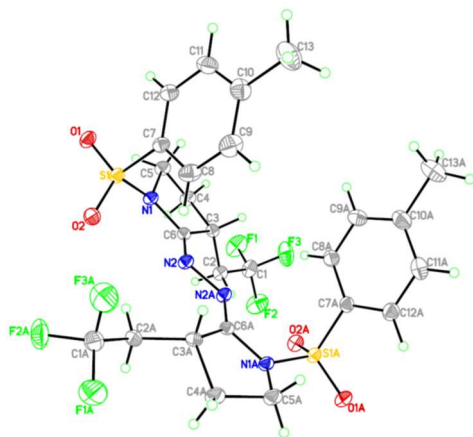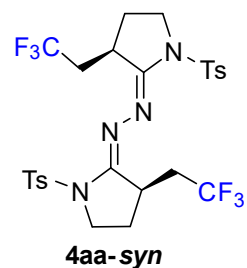

CCDC number: 2189919

Table 1. Crystal data and structure refinement for **4aa-syn**.

|                     |                                                                                             |
|---------------------|---------------------------------------------------------------------------------------------|
| Identification code | <b>4aa-syn</b>                                                                              |
| Empirical formula   | C <sub>26</sub> H <sub>28</sub> F <sub>6</sub> N <sub>4</sub> O <sub>4</sub> S <sub>2</sub> |
| Formula weight      | 638.64                                                                                      |
| Temperature         | 100(2) K                                                                                    |
| Wavelength          | 0.71073 Å                                                                                   |
| Crystal system      | Monoclinic                                                                                  |

|                                   |                                             |                                |
|-----------------------------------|---------------------------------------------|--------------------------------|
| Space group                       | C2/c                                        |                                |
| Unit cell dimensions              | a = 19.8426(6) Å                            | $\alpha = 90^\circ$ .          |
|                                   | b = 14.7342(4) Å                            | $\beta = 112.8380(10)^\circ$ . |
|                                   | c = 21.7333(9) Å                            | $\gamma = 90^\circ$ .          |
| Volume                            | 5855.9(3) Å <sup>3</sup>                    |                                |
| Z                                 | 8                                           |                                |
| Density (calculated)              | 1.449 Mg/m <sup>3</sup>                     |                                |
| Absorption coefficient            | 0.259 mm <sup>-1</sup>                      |                                |
| F(000)                            | 2640                                        |                                |
| Crystal size                      | 0.200 x 0.180 x 0.170 mm <sup>3</sup>       |                                |
| Theta range for data collection   | 2.765 to 23.737°.                           |                                |
| Index ranges                      | -22 ≤ h ≤ 22, -16 ≤ k ≤ 16, -24 ≤ l ≤ 24    |                                |
| Reflections collected             | 99617                                       |                                |
| Independent reflections           | 4444 [R(int) = 0.0283]                      |                                |
| Completeness to theta = 23.737°   | 99.8 %                                      |                                |
| Absorption correction             | Semi-empirical from equivalents             |                                |
| Max. and min. transmission        | 0.9572 and 0.9500                           |                                |
| Refinement method                 | Full-matrix least-squares on F <sup>2</sup> |                                |
| Data / restraints / parameters    | 4444 / 0 / 381                              |                                |
| Goodness-of-fit on F <sup>2</sup> | 1.054                                       |                                |
| Final R indices [I > 2σ(I)]       | R1 = 0.0388, wR2 = 0.0994                   |                                |
| R indices (all data)              | R1 = 0.0438, wR2 = 0.1054                   |                                |
| Extinction coefficient            | n/a                                         |                                |
| Largest diff. peak and hole       | 0.236 and -0.339 e.Å <sup>-3</sup>          |                                |

Table 2. Atomic coordinates ( $\times 10^4$ ) and equivalent isotropic displacement parameters ( $\text{Å}^2 \times 10^3$ ) for Y.  $U(\text{eq})$  is defined as one third of the trace of the orthogonalized  $U^{\text{ij}}$  tensor.

|      | x       | y       | z       | U(eq)  |
|------|---------|---------|---------|--------|
| S(1) | 6872(1) | 1398(1) | 8755(1) | 40(1)  |
| F(1) | 3820(1) | 257(2)  | 9214(1) | 101(1) |
| F(2) | 3089(1) | -149(2) | 8247(1) | 100(1) |
| F(3) | 3353(1) | 1242(1) | 8454(1) | 104(1) |
| O(1) | 7437(1) | 1343(1) | 9405(1) | 52(1)  |
| O(2) | 6933(1) | 884(1)  | 8223(1) | 50(1)  |
| N(1) | 6120(1) | 1072(1) | 8858(1) | 38(1)  |
| N(2) | 5366(1) | 1040(1) | 7730(1) | 39(1)  |

|       |          |          |         |        |
|-------|----------|----------|---------|--------|
| C(1)  | 3642(1)  | 416(2)   | 8573(1) | 61(1)  |
| C(2)  | 4249(1)  | 316(2)   | 8344(1) | 45(1)  |
| C(3)  | 4857(1)  | 1017(1)  | 8647(1) | 36(1)  |
| C(4)  | 5315(1)  | 877(2)   | 9392(1) | 51(1)  |
| C(5)  | 6060(1)  | 1262(2)  | 9506(1) | 47(1)  |
| C(6)  | 5426(1)  | 1027(1)  | 8338(1) | 33(1)  |
| C(7)  | 6723(1)  | 2546(2)  | 8522(1) | 41(1)  |
| C(8)  | 6332(1)  | 2781(2)  | 7863(1) | 59(1)  |
| C(9)  | 6209(2)  | 3688(2)  | 7702(1) | 72(1)  |
| C(10) | 6474(2)  | 4363(2)  | 8175(2) | 63(1)  |
| C(11) | 6876(2)  | 4108(2)  | 8822(1) | 62(1)  |
| C(12) | 7000(1)  | 3208(2)  | 9004(1) | 51(1)  |
| C(13) | 6338(2)  | 5356(2)  | 7982(2) | 95(1)  |
| S(2)  | 9287(1)  | 2616(1)  | 8861(1) | 52(1)  |
| F(4)  | 7507(1)  | 3754(2)  | 5666(1) | 119(1) |
| F(5)  | 8347(1)  | 4205(1)  | 5361(1) | 104(1) |
| F(6)  | 8204(1)  | 2797(1)  | 5484(1) | 112(1) |
| O(3)  | 8740(1)  | 2766(1)  | 9123(1) | 69(1)  |
| O(4)  | 9940(1)  | 3140(1)  | 9101(1) | 64(1)  |
| N(3)  | 8867(1)  | 2809(1)  | 8052(1) | 50(1)  |
| N(4)  | 9885(1)  | 2695(1)  | 7771(1) | 47(1)  |
| C(14) | 8194(2)  | 3609(2)  | 5750(1) | 70(1)  |
| C(15) | 8723(1)  | 3654(2)  | 6456(1) | 51(1)  |
| C(16) | 8594(1)  | 2916(2)  | 6894(1) | 47(1)  |
| C(17) | 7905(1)  | 3076(2)  | 7037(1) | 70(1)  |
| C(18) | 8066(1)  | 2675(2)  | 7716(1) | 66(1)  |
| C(19) | 9197(1)  | 2812(1)  | 7581(1) | 42(1)  |
| C(20) | 9505(2)  | 1456(2)  | 8946(1) | 56(1)  |
| C(21) | 10199(2) | 1176(2)  | 9057(2) | 80(1)  |
| C(22) | 10370(2) | 268(3)   | 9152(2) | 102(1) |
| C(23) | 9863(3)  | -368(2)  | 9128(2) | 93(1)  |
| C(24) | 9164(2)  | -83(2)   | 9016(2) | 92(1)  |
| C(25) | 8977(2)  | 835(2)   | 8927(2) | 76(1)  |
| C(26) | 10054(3) | -1373(2) | 9225(2) | 141(2) |

---

Table 3. Bond lengths [ $\text{\AA}$ ] and angles [ $^\circ$ ] for Y.

---

|              |            |
|--------------|------------|
| S(1)-O(1)    | 1.4253(15) |
| S(1)-O(2)    | 1.4256(15) |
| S(1)-N(1)    | 1.6640(17) |
| S(1)-C(7)    | 1.758(2)   |
| F(1)-C(1)    | 1.320(3)   |
| F(2)-C(1)    | 1.340(3)   |
| F(3)-C(1)    | 1.327(3)   |
| N(1)-C(6)    | 1.402(2)   |
| N(1)-C(5)    | 1.487(2)   |
| N(2)-C(6)    | 1.280(2)   |
| N(2)-N(2)#1  | 1.406(3)   |
| C(1)-C(2)    | 1.478(3)   |
| C(2)-C(3)    | 1.529(3)   |
| C(2)-H(2A)   | 0.9003     |
| C(2)-H(2B)   | 0.9296     |
| C(3)-C(6)    | 1.521(3)   |
| C(3)-C(4)    | 1.533(3)   |
| C(3)-H(3)    | 1.0000     |
| C(4)-C(5)    | 1.510(3)   |
| C(4)-H(4A)   | 0.9578     |
| C(4)-H(4B)   | 0.9884     |
| C(5)-H(5A)   | 0.9681     |
| C(5)-H(5B)   | 0.9554     |
| C(7)-C(12)   | 1.380(3)   |
| C(7)-C(8)    | 1.381(3)   |
| C(8)-C(9)    | 1.380(4)   |
| C(8)-H(8)    | 0.9500     |
| C(9)-C(10)   | 1.379(4)   |
| C(9)-H(9)    | 0.9500     |
| C(10)-C(11)  | 1.374(4)   |
| C(10)-C(13)  | 1.516(4)   |
| C(11)-C(12)  | 1.379(4)   |
| C(11)-H(11)  | 0.9500     |
| C(12)-H(12)  | 0.9500     |
| C(13)-H(13A) | 0.9800     |
| C(13)-H(13B) | 0.9800     |
| C(13)-H(13C) | 0.9800     |
| S(2)-O(4)    | 1.4214(19) |



|                |            |
|----------------|------------|
| S(2)-O(3)      | 1.4231(17) |
| S(2)-N(3)      | 1.653(2)   |
| S(2)-C(20)     | 1.755(3)   |
| F(4)-C(14)     | 1.321(4)   |
| F(5)-C(14)     | 1.334(3)   |
| F(6)-C(14)     | 1.333(3)   |
| N(3)-C(19)     | 1.411(3)   |
| N(3)-C(18)     | 1.483(3)   |
| N(4)-C(19)     | 1.277(3)   |
| N(4)-N(4)#2    | 1.416(3)   |
| C(14)-C(15)    | 1.486(4)   |
| C(15)-C(16)    | 1.531(3)   |
| C(15)-H(15A)   | 0.9328     |
| C(15)-H(15B)   | 0.9327     |
| C(16)-C(19)    | 1.514(3)   |
| C(16)-C(17)    | 1.534(3)   |
| C(16)-H(16)    | 1.0000     |
| C(17)-C(18)    | 1.504(4)   |
| C(17)-H(17A)   | 1.0164     |
| C(17)-H(17B)   | 0.9153     |
| C(18)-H(18A)   | 0.9651     |
| C(18)-H(18B)   | 1.0513     |
| C(20)-C(21)    | 1.366(4)   |
| C(20)-C(25)    | 1.380(4)   |
| C(21)-C(22)    | 1.376(5)   |
| C(21)-H(21)    | 0.9500     |
| C(22)-C(23)    | 1.361(6)   |
| C(22)-H(22)    | 0.9500     |
| C(23)-C(24)    | 1.377(5)   |
| C(23)-C(26)    | 1.523(5)   |
| C(24)-C(25)    | 1.396(4)   |
| C(24)-H(24)    | 0.9500     |
| C(25)-H(25)    | 0.9500     |
| C(26)-H(26A)   | 0.9800     |
| C(26)-H(26B)   | 0.9800     |
| C(26)-H(26C)   | 0.9800     |
| O(1)-S(1)-O(2) | 119.49(10) |

|                  |            |
|------------------|------------|
| O(1)-S(1)-N(1)   | 104.61(9)  |
| O(2)-S(1)-N(1)   | 108.51(9)  |
| O(1)-S(1)-C(7)   | 108.70(10) |
| O(2)-S(1)-C(7)   | 109.58(10) |
| N(1)-S(1)-C(7)   | 104.93(9)  |
| C(6)-N(1)-C(5)   | 110.94(16) |
| C(6)-N(1)-S(1)   | 123.83(13) |
| C(5)-N(1)-S(1)   | 118.62(13) |
| C(6)-N(2)-N(2)#1 | 113.06(19) |
| F(1)-C(1)-F(3)   | 106.6(3)   |
| F(1)-C(1)-F(2)   | 106.0(2)   |
| F(3)-C(1)-F(2)   | 105.3(2)   |
| F(1)-C(1)-C(2)   | 114.7(2)   |
| F(3)-C(1)-C(2)   | 111.9(2)   |
| F(2)-C(1)-C(2)   | 111.6(2)   |
| C(1)-C(2)-C(3)   | 113.5(2)   |
| C(1)-C(2)-H(2A)  | 106.1      |
| C(3)-C(2)-H(2A)  | 111.6      |
| C(1)-C(2)-H(2B)  | 105.7      |
| C(3)-C(2)-H(2B)  | 108.9      |
| H(2A)-C(2)-H(2B) | 111.0      |
| C(6)-C(3)-C(2)   | 114.45(16) |
| C(6)-C(3)-C(4)   | 103.33(16) |
| C(2)-C(3)-C(4)   | 114.14(17) |
| C(6)-C(3)-H(3)   | 108.2      |
| C(2)-C(3)-H(3)   | 108.2      |
| C(4)-C(3)-H(3)   | 108.2      |
| C(5)-C(4)-C(3)   | 105.29(17) |
| C(5)-C(4)-H(4A)  | 113.1      |
| C(3)-C(4)-H(4A)  | 113.3      |
| C(5)-C(4)-H(4B)  | 108.2      |
| C(3)-C(4)-H(4B)  | 107.1      |
| H(4A)-C(4)-H(4B) | 109.5      |
| N(1)-C(5)-C(4)   | 101.97(16) |
| N(1)-C(5)-H(5A)  | 109.0      |
| C(4)-C(5)-H(5A)  | 111.8      |
| N(1)-C(5)-H(5B)  | 108.0      |
| C(4)-C(5)-H(5B)  | 113.4      |

|                     |            |
|---------------------|------------|
| H(5A)-C(5)-H(5B)    | 112.0      |
| N(2)-C(6)-N(1)      | 120.03(17) |
| N(2)-C(6)-C(3)      | 131.85(17) |
| N(1)-C(6)-C(3)      | 108.04(15) |
| C(12)-C(7)-C(8)     | 120.6(2)   |
| C(12)-C(7)-S(1)     | 119.18(17) |
| C(8)-C(7)-S(1)      | 120.25(17) |
| C(9)-C(8)-C(7)      | 118.6(2)   |
| C(9)-C(8)-H(8)      | 120.7      |
| C(7)-C(8)-H(8)      | 120.7      |
| C(10)-C(9)-C(8)     | 122.0(3)   |
| C(10)-C(9)-H(9)     | 119.0      |
| C(8)-C(9)-H(9)      | 119.0      |
| C(11)-C(10)-C(9)    | 117.9(2)   |
| C(11)-C(10)-C(13)   | 121.1(3)   |
| C(9)-C(10)-C(13)    | 120.9(3)   |
| C(10)-C(11)-C(12)   | 121.7(2)   |
| C(10)-C(11)-H(11)   | 119.2      |
| C(12)-C(11)-H(11)   | 119.2      |
| C(11)-C(12)-C(7)    | 119.2(2)   |
| C(11)-C(12)-H(12)   | 120.4      |
| C(7)-C(12)-H(12)    | 120.4      |
| C(10)-C(13)-H(13A)  | 109.5      |
| C(10)-C(13)-H(13B)  | 109.5      |
| H(13A)-C(13)-H(13B) | 109.5      |
| C(10)-C(13)-H(13C)  | 109.5      |
| H(13A)-C(13)-H(13C) | 109.5      |
| H(13B)-C(13)-H(13C) | 109.5      |
| O(4)-S(2)-O(3)      | 119.78(12) |
| O(4)-S(2)-N(3)      | 107.92(10) |
| O(3)-S(2)-N(3)      | 104.58(11) |
| O(4)-S(2)-C(20)     | 109.69(12) |
| O(3)-S(2)-C(20)     | 107.69(12) |
| N(3)-S(2)-C(20)     | 106.34(11) |
| C(19)-N(3)-C(18)    | 110.71(19) |
| C(19)-N(3)-S(2)     | 126.05(16) |
| C(18)-N(3)-S(2)     | 120.10(16) |
| C(19)-N(4)-N(4)#2   | 112.4(2)   |

|                     |            |
|---------------------|------------|
| F(4)-C(14)-F(6)     | 105.9(3)   |
| F(4)-C(14)-F(5)     | 106.4(3)   |
| F(6)-C(14)-F(5)     | 105.6(3)   |
| F(4)-C(14)-C(15)    | 114.4(3)   |
| F(6)-C(14)-C(15)    | 111.3(2)   |
| F(5)-C(14)-C(15)    | 112.5(2)   |
| C(14)-C(15)-C(16)   | 112.9(2)   |
| C(14)-C(15)-H(15A)  | 105.0      |
| C(16)-C(15)-H(15A)  | 112.3      |
| C(14)-C(15)-H(15B)  | 107.1      |
| C(16)-C(15)-H(15B)  | 110.4      |
| H(15A)-C(15)-H(15B) | 108.8      |
| C(19)-C(16)-C(15)   | 115.23(18) |
| C(19)-C(16)-C(17)   | 103.93(19) |
| C(15)-C(16)-C(17)   | 113.2(2)   |
| C(19)-C(16)-H(16)   | 108.1      |
| C(15)-C(16)-H(16)   | 108.1      |
| C(17)-C(16)-H(16)   | 108.1      |
| C(18)-C(17)-C(16)   | 105.7(2)   |
| C(18)-C(17)-H(17A)  | 108.0      |
| C(16)-C(17)-H(17A)  | 109.8      |
| C(18)-C(17)-H(17B)  | 112.6      |
| C(16)-C(17)-H(17B)  | 108.7      |
| H(17A)-C(17)-H(17B) | 111.8      |
| N(3)-C(18)-C(17)    | 102.1(2)   |
| N(3)-C(18)-H(18A)   | 109.3      |
| C(17)-C(18)-H(18A)  | 111.6      |
| N(3)-C(18)-H(18B)   | 109.8      |
| C(17)-C(18)-H(18B)  | 112.7      |
| H(18A)-C(18)-H(18B) | 111.0      |
| N(4)-C(19)-N(3)     | 120.3(2)   |
| N(4)-C(19)-C(16)    | 131.87(19) |
| N(3)-C(19)-C(16)    | 107.73(18) |
| C(21)-C(20)-C(25)   | 120.4(3)   |
| C(21)-C(20)-S(2)    | 120.2(2)   |
| C(25)-C(20)-S(2)    | 119.3(2)   |
| C(20)-C(21)-C(22)   | 119.6(3)   |
| C(20)-C(21)-H(21)   | 120.2      |

|                     |          |
|---------------------|----------|
| C(22)-C(21)-H(21)   | 120.2    |
| C(23)-C(22)-C(21)   | 121.9(4) |
| C(23)-C(22)-H(22)   | 119.1    |
| C(21)-C(22)-H(22)   | 119.1    |
| C(22)-C(23)-C(24)   | 118.4(3) |
| C(22)-C(23)-C(26)   | 121.6(4) |
| C(24)-C(23)-C(26)   | 120.0(4) |
| C(23)-C(24)-C(25)   | 121.0(3) |
| C(23)-C(24)-H(24)   | 119.5    |
| C(25)-C(24)-H(24)   | 119.5    |
| C(20)-C(25)-C(24)   | 118.7(3) |
| C(20)-C(25)-H(25)   | 120.6    |
| C(24)-C(25)-H(25)   | 120.6    |
| C(23)-C(26)-H(26A)  | 109.5    |
| C(23)-C(26)-H(26B)  | 109.5    |
| H(26A)-C(26)-H(26B) | 109.5    |
| C(23)-C(26)-H(26C)  | 109.5    |
| H(26A)-C(26)-H(26C) | 109.5    |
| H(26B)-C(26)-H(26C) | 109.5    |

---

Symmetry transformations used to generate equivalent atoms:

#1  $-x+1, y, -z+3/2$     #2  $-x+2, y, -z+3/2$

Table 4. Anisotropic displacement parameters ( $\text{\AA}^2 \times 10^3$ ) for Y. The anisotropic displacement factor exponent takes the form:  $-2\pi^2 [ h^2 a^{*2} U^{11} + \dots + 2 h k a^* b^* U^{12} ]$

---

|      | U <sup>11</sup> | U <sup>22</sup> | U <sup>33</sup> | U <sup>23</sup> | U <sup>13</sup> | U <sup>12</sup> |
|------|-----------------|-----------------|-----------------|-----------------|-----------------|-----------------|
| S(1) | 36(1)           | 48(1)           | 35(1)           | -2(1)           | 12(1)           | 0(1)            |
| F(1) | 88(1)           | 173(2)          | 62(1)           | 24(1)           | 49(1)           | -4(1)           |
| F(2) | 66(1)           | 132(2)          | 110(1)          | 0(1)            | 43(1)           | -38(1)          |
| F(3) | 76(1)           | 99(1)           | 158(2)          | 22(1)           | 69(1)           | 29(1)           |
| O(1) | 40(1)           | 65(1)           | 41(1)           | 1(1)            | 5(1)            | 3(1)            |
| O(2) | 46(1)           | 59(1)           | 48(1)           | -8(1)           | 22(1)           | 2(1)            |
| N(1) | 39(1)           | 47(1)           | 25(1)           | 0(1)            | 11(1)           | -2(1)           |
| N(2) | 36(1)           | 53(1)           | 28(1)           | -2(1)           | 13(1)           | -1(1)           |
| C(1) | 51(1)           | 76(2)           | 63(2)           | 14(1)           | 28(1)           | 0(1)            |
| C(2) | 47(1)           | 52(1)           | 40(1)           | 6(1)            | 20(1)           | -4(1)           |

|       |        |        |        |        |       |        |
|-------|--------|--------|--------|--------|-------|--------|
| C(3)  | 43(1)  | 39(1)  | 30(1)  | 3(1)   | 18(1) | 4(1)   |
| C(4)  | 53(1)  | 72(2)  | 30(1)  | 2(1)   | 19(1) | -2(1)  |
| C(5)  | 52(1)  | 60(1)  | 27(1)  | -1(1)  | 16(1) | -1(1)  |
| C(6)  | 38(1)  | 33(1)  | 29(1)  | 1(1)   | 14(1) | 0(1)   |
| C(7)  | 38(1)  | 46(1)  | 42(1)  | -1(1)  | 17(1) | -7(1)  |
| C(8)  | 70(2)  | 57(2)  | 43(1)  | 3(1)   | 14(1) | -15(1) |
| C(9)  | 80(2)  | 68(2)  | 58(2)  | 20(1)  | 16(1) | -7(2)  |
| C(10) | 65(2)  | 52(2)  | 79(2)  | 10(1)  | 35(2) | -3(1)  |
| C(11) | 66(2)  | 52(2)  | 73(2)  | -12(1) | 32(1) | -11(1) |
| C(12) | 52(1)  | 54(1)  | 46(1)  | -4(1)  | 17(1) | -5(1)  |
| C(13) | 121(3) | 56(2)  | 120(3) | 20(2)  | 59(2) | 7(2)   |
| S(2)  | 67(1)  | 52(1)  | 52(1)  | -3(1)  | 37(1) | 4(1)   |
| F(4)  | 65(1)  | 180(2) | 87(1)  | 26(1)  | 4(1)  | 14(1)  |
| F(5)  | 132(2) | 108(2) | 60(1)  | 23(1)  | 22(1) | -13(1) |
| F(6)  | 144(2) | 94(1)  | 67(1)  | -27(1) | 7(1)  | -15(1) |
| O(3)  | 87(1)  | 71(1)  | 73(1)  | 0(1)   | 58(1) | 14(1)  |
| O(4)  | 74(1)  | 68(1)  | 55(1)  | -7(1)  | 30(1) | -9(1)  |
| N(3)  | 48(1)  | 58(1)  | 55(1)  | 2(1)   | 31(1) | 2(1)   |
| N(4)  | 48(1)  | 58(1)  | 44(1)  | 0(1)   | 26(1) | 0(1)   |
| C(14) | 77(2)  | 68(2)  | 57(2)  | 0(1)   | 17(1) | -6(2)  |
| C(15) | 55(1)  | 43(1)  | 52(1)  | 0(1)   | 18(1) | -4(1)  |
| C(16) | 48(1)  | 41(1)  | 52(1)  | -6(1)  | 19(1) | -8(1)  |
| C(17) | 47(1)  | 91(2)  | 69(2)  | 5(2)   | 21(1) | -4(1)  |
| C(18) | 52(2)  | 80(2)  | 77(2)  | 2(2)   | 36(1) | -4(1)  |
| C(19) | 47(1)  | 39(1)  | 46(1)  | -3(1)  | 25(1) | -4(1)  |
| C(20) | 74(2)  | 55(1)  | 51(1)  | 1(1)   | 37(1) | 8(1)   |
| C(21) | 92(2)  | 78(2)  | 95(2)  | 20(2)  | 63(2) | 24(2)  |
| C(22) | 131(3) | 87(3)  | 119(3) | 32(2)  | 83(3) | 48(2)  |
| C(23) | 156(4) | 66(2)  | 68(2)  | 13(2)  | 56(2) | 35(2)  |
| C(24) | 134(3) | 58(2)  | 86(2)  | 2(2)   | 44(2) | -10(2) |
| C(25) | 83(2)  | 65(2)  | 85(2)  | 4(2)   | 39(2) | 0(2)   |
| C(26) | 263(6) | 68(2)  | 101(3) | 23(2)  | 82(4) | 57(3)  |

Table 5. Hydrogen coordinates ( $\times 10^4$ ) and isotropic displacement parameters ( $\text{\AA}^2 \times 10^{-3}$ ) for Y.

---

|  | x | y | z | U(eq) |
|--|---|---|---|-------|
|--|---|---|---|-------|

---

|        |       |       |      |     |
|--------|-------|-------|------|-----|
| H(2A)  | 4047  | 355   | 7896 | 54  |
| H(2B)  | 4440  | -260  | 8480 | 54  |
| H(3)   | 4627  | 1632  | 8587 | 44  |
| H(4A)  | 5101  | 1143  | 9676 | 61  |
| H(4B)  | 5367  | 216   | 9471 | 61  |
| H(5A)  | 6079  | 1912  | 9578 | 56  |
| H(5B)  | 6451  | 954   | 9848 | 56  |
| H(8)   | 6151  | 2327  | 7529 | 71  |
| H(9)   | 5934  | 3853  | 7251 | 86  |
| H(11)  | 7074  | 4563  | 9153 | 75  |
| H(12)  | 7272  | 3045  | 9456 | 61  |
| H(13A) | 6501  | 5487  | 7619 | 143 |
| H(13B) | 6611  | 5735  | 8369 | 143 |
| H(13C) | 5815  | 5487  | 7833 | 143 |
| H(15A) | 9183  | 3607  | 6435 | 61  |
| H(15B) | 8679  | 4228  | 6616 | 61  |
| H(16)  | 8538  | 2323  | 6656 | 57  |
| H(17A) | 7821  | 3753  | 7063 | 83  |
| H(17B) | 7517  | 2801  | 6709 | 83  |
| H(18A) | 7824  | 3006  | 7955 | 80  |
| H(18B) | 7942  | 1979  | 7697 | 80  |
| H(21)  | 10560 | 1605  | 9069 | 96  |
| H(22)  | 10856 | 80    | 9238 | 122 |
| H(24)  | 8804  | -518  | 9000 | 111 |
| H(25)  | 8495  | 1028  | 8854 | 91  |
| H(26A) | 9653  | -1706 | 9279 | 212 |
| H(26B) | 10503 | -1454 | 9624 | 212 |
| H(26C) | 10129 | -1606 | 8834 | 212 |

---

### 3. Compound 4aa-anti:

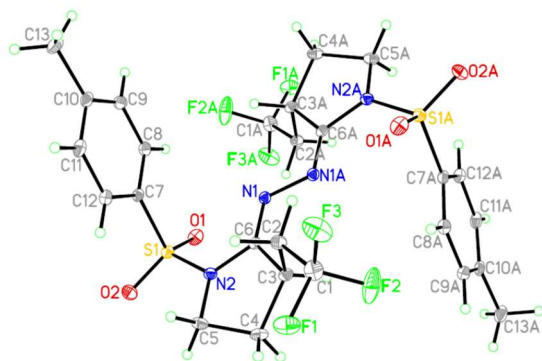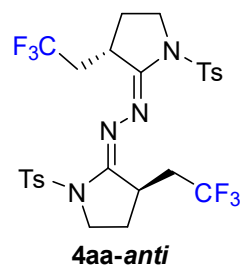

**CCDC number:** 2189918

Table 1. Crystal data and structure refinement for **4aa-anti**.

|                                   |                                                                                             |                  |
|-----------------------------------|---------------------------------------------------------------------------------------------|------------------|
| Identification code               | <b>4aa-anti</b>                                                                             |                  |
| Empirical formula                 | C <sub>26</sub> H <sub>28</sub> F <sub>6</sub> N <sub>4</sub> O <sub>4</sub> S <sub>2</sub> |                  |
| Formula weight                    | 638.66                                                                                      |                  |
| Temperature                       | 100(2) K                                                                                    |                  |
| Wavelength                        | 0.71073 Å                                                                                   |                  |
| Crystal system                    | Monoclinic                                                                                  |                  |
| Space group                       | P2 <sub>1</sub> /c                                                                          |                  |
| Unit cell dimensions              | a = 9.6979(5) Å                                                                             | α = 90°.         |
|                                   | b = 13.7295(6) Å                                                                            | β = 117.729(3)°. |
|                                   | c = 11.9468(5) Å                                                                            | γ = 90°.         |
| Volume                            | 1408.01(12) Å <sup>3</sup>                                                                  |                  |
| Z                                 | 2                                                                                           |                  |
| Density (calculated)              | 1.506 Mg/m <sup>3</sup>                                                                     |                  |
| Absorption coefficient            | 0.270 mm <sup>-1</sup>                                                                      |                  |
| F(000)                            | 660                                                                                         |                  |
| Crystal size                      | 0.210 x 0.200 x 0.180 mm <sup>3</sup>                                                       |                  |
| Theta range for data collection   | 2.700 to 27.500°.                                                                           |                  |
| Index ranges                      | -12 ≤ h ≤ 12, -17 ≤ k ≤ 17, -15 ≤ l ≤ 15                                                    |                  |
| Reflections collected             | 51146                                                                                       |                  |
| Independent reflections           | 3225 [R(int) = 0.0300]                                                                      |                  |
| Completeness to theta = 25.242°   | 99.7 %                                                                                      |                  |
| Refinement method                 | Full-matrix least-squares on F <sup>2</sup>                                                 |                  |
| Data / restraints / parameters    | 3225 / 0 / 191                                                                              |                  |
| Goodness-of-fit on F <sup>2</sup> | 1.051                                                                                       |                  |
| Final R indices [I > 2σ(I)]       | R1 = 0.0308, wR2 = 0.0753                                                                   |                  |
| R indices (all data)              | R1 = 0.0346, wR2 = 0.0784                                                                   |                  |
| Extinction coefficient            | n/a                                                                                         |                  |
| Largest diff. peak and hole       | 0.357 and -0.384 e.Å <sup>-3</sup>                                                          |                  |



Table 2. Atomic coordinates ( $\times 10^4$ ) and equivalent isotropic displacement parameters ( $\text{\AA}^2 \times 10^3$ ) for Y.  $U(\text{eq})$  is defined as one third of the trace of the orthogonalized  $U^{ij}$  tensor.

|       | x        | y        | z        | $U(\text{eq})$ |
|-------|----------|----------|----------|----------------|
| S(1)  | -1868(1) | -2352(1) | -1411(1) | 18(1)          |
| F(1)  | 2498(1)  | -1686(1) | 4532(1)  | 34(1)          |
| F(2)  | 3576(1)  | -468(1)  | 4139(1)  | 56(1)          |
| F(3)  | 1750(1)  | -247(1)  | 4669(1)  | 44(1)          |
| O(1)  | -1676(1) | -1904(1) | -2413(1) | 25(1)          |
| O(2)  | -2053(1) | -3387(1) | -1415(1) | 28(1)          |
| N(1)  | -387(1)  | -431(1)  | -317(1)  | 16(1)          |
| N(2)  | -310(1)  | -2118(1) | -56(1)   | 17(1)          |
| C(1)  | 2206(2)  | -802(1)  | 3979(1)  | 27(1)          |
| C(2)  | 990(2)   | -824(1)  | 2618(1)  | 20(1)          |
| C(3)  | 1554(1)  | -1244(1) | 1712(1)  | 18(1)          |
| C(4)  | 1936(2)  | -2338(1) | 1857(1)  | 23(1)          |
| C(5)  | 407(2)   | -2846(1) | 976(1)   | 21(1)          |
| C(6)  | 229(1)   | -1178(1) | 372(1)   | 15(1)          |
| C(7)  | -3424(1) | -1776(1) | -1308(1) | 17(1)          |
| C(8)  | -4258(2) | -1048(1) | -2162(1) | 20(1)          |
| C(9)  | -5503(2) | -610(1)  | -2078(1) | 23(1)          |
| C(10) | -5900(2) | -886(1)  | -1143(1) | 23(1)          |
| C(11) | -5021(2) | -1604(1) | -281(1)  | 23(1)          |
| C(12) | -3793(2) | -2062(1) | -359(1)  | 20(1)          |
| C(13) | -7295(2) | -441(1)  | -1097(2) | 32(1)          |

Table 3. Bond lengths [ $\text{\AA}$ ] and angles [ $^\circ$ ] for Y.

|           |            |
|-----------|------------|
| S(1)-O(2) | 1.4309(10) |
| S(1)-O(1) | 1.4326(10) |
| S(1)-N(2) | 1.6525(11) |
| S(1)-C(7) | 1.7586(12) |
| F(1)-C(1) | 1.3479(17) |
| F(2)-C(1) | 1.3320(18) |
| F(3)-C(1) | 1.3395(18) |

|                  |            |
|------------------|------------|
| N(1)-C(6)        | 1.2759(16) |
| N(1)-N(1)#1      | 1.418(2)   |
| N(2)-C(6)        | 1.3981(16) |
| N(2)-C(5)        | 1.4853(16) |
| C(1)-C(2)        | 1.5005(18) |
| C(2)-C(3)        | 1.5351(17) |
| C(2)-H(2A)       | 0.9900     |
| C(2)-H(2B)       | 0.9900     |
| C(3)-C(6)        | 1.5187(16) |
| C(3)-C(4)        | 1.5375(18) |
| C(3)-H(3)        | 1.0000     |
| C(4)-C(5)        | 1.530(2)   |
| C(4)-H(4A)       | 0.9900     |
| C(4)-H(4B)       | 0.9900     |
| C(5)-H(5A)       | 0.9900     |
| C(5)-H(5B)       | 0.9900     |
| C(7)-C(8)        | 1.3874(18) |
| C(7)-C(12)       | 1.3943(18) |
| C(8)-C(9)        | 1.3940(19) |
| C(8)-H(8)        | 0.9500     |
| C(9)-C(10)       | 1.392(2)   |
| C(9)-H(9)        | 0.9500     |
| C(10)-C(11)      | 1.394(2)   |
| C(10)-C(13)      | 1.5093(18) |
| C(11)-C(12)      | 1.3886(19) |
| C(11)-H(11)      | 0.9500     |
| C(12)-H(12)      | 0.9500     |
| C(13)-H(13A)     | 0.9800     |
| C(13)-H(13B)     | 0.9800     |
| C(13)-H(13C)     | 0.9800     |
| O(2)-S(1)-O(1)   | 119.22(6)  |
| O(2)-S(1)-N(2)   | 104.60(6)  |
| O(1)-S(1)-N(2)   | 108.65(6)  |
| O(2)-S(1)-C(7)   | 109.67(6)  |
| O(1)-S(1)-C(7)   | 108.35(6)  |
| N(2)-S(1)-C(7)   | 105.50(6)  |
| C(6)-N(1)-N(1)#1 | 110.69(12) |

|                  |            |
|------------------|------------|
| C(6)-N(2)-C(5)   | 111.52(10) |
| C(6)-N(2)-S(1)   | 123.62(9)  |
| C(5)-N(2)-S(1)   | 122.97(9)  |
| F(2)-C(1)-F(3)   | 108.02(13) |
| F(2)-C(1)-F(1)   | 105.74(13) |
| F(3)-C(1)-F(1)   | 105.39(11) |
| F(2)-C(1)-C(2)   | 112.99(11) |
| F(3)-C(1)-C(2)   | 111.09(12) |
| F(1)-C(1)-C(2)   | 113.13(12) |
| C(1)-C(2)-C(3)   | 114.42(11) |
| C(1)-C(2)-H(2A)  | 108.7      |
| C(3)-C(2)-H(2A)  | 108.7      |
| C(1)-C(2)-H(2B)  | 108.7      |
| C(3)-C(2)-H(2B)  | 108.7      |
| H(2A)-C(2)-H(2B) | 107.6      |
| C(6)-C(3)-C(2)   | 108.42(10) |
| C(6)-C(3)-C(4)   | 102.64(10) |
| C(2)-C(3)-C(4)   | 115.72(11) |
| C(6)-C(3)-H(3)   | 109.9      |
| C(2)-C(3)-H(3)   | 109.9      |
| C(4)-C(3)-H(3)   | 109.9      |
| C(5)-C(4)-C(3)   | 105.21(10) |
| C(5)-C(4)-H(4A)  | 110.7      |
| C(3)-C(4)-H(4A)  | 110.7      |
| C(5)-C(4)-H(4B)  | 110.7      |
| C(3)-C(4)-H(4B)  | 110.7      |
| H(4A)-C(4)-H(4B) | 108.8      |
| N(2)-C(5)-C(4)   | 101.13(10) |
| N(2)-C(5)-H(5A)  | 111.5      |
| C(4)-C(5)-H(5A)  | 111.5      |
| N(2)-C(5)-H(5B)  | 111.5      |
| C(4)-C(5)-H(5B)  | 111.5      |
| H(5A)-C(5)-H(5B) | 109.4      |
| N(1)-C(6)-N(2)   | 121.53(11) |
| N(1)-C(6)-C(3)   | 129.84(11) |
| N(2)-C(6)-C(3)   | 108.62(10) |
| C(8)-C(7)-C(12)  | 121.22(12) |
| C(8)-C(7)-S(1)   | 119.87(10) |

|                     |            |
|---------------------|------------|
| C(12)-C(7)-S(1)     | 118.92(10) |
| C(7)-C(8)-C(9)      | 119.11(12) |
| C(7)-C(8)-H(8)      | 120.4      |
| C(9)-C(8)-H(8)      | 120.4      |
| C(10)-C(9)-C(8)     | 120.77(13) |
| C(10)-C(9)-H(9)     | 119.6      |
| C(8)-C(9)-H(9)      | 119.6      |
| C(9)-C(10)-C(11)    | 118.94(12) |
| C(9)-C(10)-C(13)    | 120.42(14) |
| C(11)-C(10)-C(13)   | 120.60(13) |
| C(12)-C(11)-C(10)   | 121.27(12) |
| C(12)-C(11)-H(11)   | 119.4      |
| C(10)-C(11)-H(11)   | 119.4      |
| C(11)-C(12)-C(7)    | 118.66(12) |
| C(11)-C(12)-H(12)   | 120.7      |
| C(7)-C(12)-H(12)    | 120.7      |
| C(10)-C(13)-H(13A)  | 109.5      |
| C(10)-C(13)-H(13B)  | 109.5      |
| H(13A)-C(13)-H(13B) | 109.5      |
| C(10)-C(13)-H(13C)  | 109.5      |
| H(13A)-C(13)-H(13C) | 109.5      |
| H(13B)-C(13)-H(13C) | 109.5      |

---

Symmetry transformations used to generate equivalent atoms:

#1 -x,-y,-z

Table 4. Anisotropic displacement parameters ( $\text{\AA}^2 \times 10^3$ ) for Y. The anisotropic displacement factor exponent takes the form:  $-2\pi^2 [ h^2 a^{*2} U^{11} + \dots + 2 h k a^* b^* U^{12} ]$

|      | U <sup>11</sup> | U <sup>22</sup> | U <sup>33</sup> | U <sup>23</sup> | U <sup>13</sup> | U <sup>12</sup> |
|------|-----------------|-----------------|-----------------|-----------------|-----------------|-----------------|
| S(1) | 19(1)           | 19(1)           | 18(1)           | -4(1)           | 10(1)           | 0(1)            |
| F(1) | 45(1)           | 38(1)           | 21(1)           | 13(1)           | 15(1)           | 14(1)           |
| F(2) | 38(1)           | 93(1)           | 24(1)           | 3(1)            | 4(1)            | -33(1)          |
| F(3) | 71(1)           | 36(1)           | 23(1)           | -4(1)           | 21(1)           | 4(1)            |
| O(1) | 25(1)           | 36(1)           | 18(1)           | -3(1)           | 14(1)           | 1(1)            |
| O(2) | 31(1)           | 19(1)           | 35(1)           | -9(1)           | 16(1)           | -1(1)           |
| N(1) | 15(1)           | 16(1)           | 16(1)           | 1(1)            | 8(1)            | -1(1)           |

|       |       |       |       |        |       |       |
|-------|-------|-------|-------|--------|-------|-------|
| N(2)  | 17(1) | 16(1) | 17(1) | 2(1)   | 8(1)  | 2(1)  |
| C(1)  | 32(1) | 30(1) | 18(1) | 3(1)   | 11(1) | -3(1) |
| C(2)  | 21(1) | 20(1) | 17(1) | 2(1)   | 8(1)  | 2(1)  |
| C(3)  | 16(1) | 20(1) | 16(1) | 4(1)   | 6(1)  | 4(1)  |
| C(4)  | 24(1) | 22(1) | 20(1) | 4(1)   | 8(1)  | 9(1)  |
| C(5)  | 27(1) | 18(1) | 22(1) | 6(1)   | 14(1) | 6(1)  |
| C(6)  | 13(1) | 18(1) | 15(1) | 1(1)   | 8(1)  | 1(1)  |
| C(7)  | 14(1) | 18(1) | 18(1) | -4(1)  | 8(1)  | -3(1) |
| C(8)  | 19(1) | 21(1) | 19(1) | -1(1)  | 8(1)  | -3(1) |
| C(9)  | 17(1) | 20(1) | 26(1) | -2(1)  | 5(1)  | -1(1) |
| C(10) | 14(1) | 23(1) | 28(1) | -12(1) | 8(1)  | -6(1) |
| C(11) | 19(1) | 30(1) | 22(1) | -7(1)  | 12(1) | -7(1) |
| C(12) | 18(1) | 23(1) | 19(1) | -1(1)  | 9(1)  | -3(1) |
| C(13) | 18(1) | 35(1) | 44(1) | -17(1) | 14(1) | -3(1) |

Table 5. Hydrogen coordinates ( $\times 10^4$ ) and isotropic displacement parameters ( $\text{\AA}^2 \times 10^{-3}$ ) for Y.

|        | x     | y     | z     | U(eq) |
|--------|-------|-------|-------|-------|
| H(2A)  | 612   | -152  | 2348  | 23    |
| H(2B)  | 96    | -1216 | 2547  | 23    |
| H(3)   | 2471  | -865  | 1781  | 21    |
| H(4A)  | 2753  | -2488 | 1606  | 28    |
| H(4B)  | 2304  | -2548 | 2743  | 28    |
| H(5A)  | 594   | -3474 | 661   | 25    |
| H(5B)  | -247  | -2960 | 1400  | 25    |
| H(8)   | -3984 | -852  | -2795 | 24    |
| H(9)   | -6088 | -117  | -2666 | 28    |
| H(11)  | -5268 | -1783 | 374   | 27    |
| H(12)  | -3216 | -2561 | 222   | 24    |
| H(13A) | -7622 | 144   | -1628 | 49    |
| H(13B) | -7019 | -265  | -223  | 49    |
| H(13C) | -8152 | -913  | -1410 | 49    |
